1 **Title:** Mucosal immune stimulation with HSV-2 and polyICLC boosts control of viremia in  
2 SIV $\Delta$ Nef vaccinated rhesus macaques with breakthrough SIV infection

3

4 **Short Title:** Modulating SIV $\Delta$ Nef for SIV controller phenotype

5

6 **Authors:** Meropi Aravantinou<sup>1</sup>, Olga Mizenina<sup>1</sup>, Thilo Brill<sup>2</sup>, Jessica Kenney<sup>1</sup>, Christine  
7 Timmons<sup>1</sup>, Ines Frank<sup>1</sup>, Agegnehu Gettie<sup>3</sup>, Brooke Grasperge<sup>4</sup>, James Blanchard<sup>4</sup>, Andres  
8 Salazar<sup>5</sup>, Jeffrey D. Lifson<sup>6</sup>, Melissa Robbiani<sup>7</sup>, and Nina Derby<sup>1\*</sup>

9

10 **Affiliations:** <sup>1</sup>Center for Biomedical Research, Population Council, New York, NY, USA;  
11 <sup>2</sup>Linköping University, Linköping, Sweden; <sup>3</sup>Aaron Diamond AIDS Research Center, Rockefeller  
12 University, New York, NY, USA; <sup>4</sup>Tulane National Primate Research Center, Tulane University  
13 Health Sciences Center, Covington, LA, USA; <sup>5</sup>Oncovir, Inc., Washington, DC, USA; <sup>6</sup>AIDS and  
14 Cancer Virus Program, Leidos Biomedical Research, Inc., Frederick National Laboratory,  
15 Frederick, MD, USA; <sup>7</sup>mjr4consulting@gmail.com.

16

17 \*Corresponding author

18 Nina Derby, Population Council, 1230 York Avenue, New York, NY, 10065

19 Tel (212) 327-8737, Fax (212) 327-7764, Email [nderby@popcouncil.org](mailto:nderby@popcouncil.org)

20

21

22

23 **ABSTRACT**

24 Development of an effective human immunodeficiency virus (HIV) vaccine is among the highest  
25 priorities in the biomedical research agenda. Adjuvants enhance vaccine efficacy, but in the  
26 case of HIV, strong or inappropriate immune activation may undermine protection by increasing  
27 HIV susceptibility. Co-infection with immunomodulatory pathogens may also impact vaccine  
28 efficacy. In the rhesus macaque rectal SIV $\Delta$ Nef live attenuated vaccine model, we utilized a low  
29 virulence HSV-2 infection and the double-stranded RNA viral mimic polyI:CLC as tools to probe  
30 the effects of distinct types of immune activation on HIV vaccine efficacy and explore novel  
31 correlates of protection from wild type SIV. Rectally administered HSV-2 and polyI:CLC impacted  
32 the protection conferred by mucosal SIV $\Delta$ Nef vaccination by favoring partial protection in  
33 animals with breakthrough infection following virulent SIV challenge (“Controllers”). However,  
34 SIV $\Delta$ Nef persistence in blood and tissues did not predict protection in this rectal immunization  
35 and challenge model. Non-controllers had similar SIV $\Delta$ Nef viremia as completely protected  
36 macaques, and while they tended to have less replication competent SIV $\Delta$ Nef in lymph nodes,  
37 controllers had no recoverable virus in the lymph nodes. Non-controllers differed from protected  
38 macaques immunologically by having a greater frequency of pro-inflammatory CXCR3<sup>+</sup>CCR6<sup>+</sup>  
39 CD4 T cells in blood and a monofunctional IFN $\gamma$ -dominant CD8 T cell response in lymph nodes.  
40 Controller phenotype was associated with heightened IFN $\alpha$  production during acute SIV  
41 infection and a greater frequency of CXCR5<sup>+</sup> CD4 T cells in blood pre-challenge despite a lower  
42 frequency of cells with the T follicular helper (Tfh) cell phenotype in blood and lymph nodes. Our  
43 results establish novel correlates of immunological control of SIV infection while reinforcing the  
44 potential importance of T cell functionality and location in SIV $\Delta$ Nef efficacy. Moreover, this work  
45 highlights that triggering of mucosal immunity can aid mucosal vaccine strategies rather than  
46 undermine protection.

47

48 **AUTHOR SUMMARY**

49 An efficacious HIV vaccine is essential to contain the HIV pandemic. Vaccine-mediated  
50 protection from HIV may be either enhanced or obstructed by mucosal immune activation; thus,  
51 the impact of adjuvants and underlying co-infections that lead to immune activation needs to be  
52 evaluated. Using the SIV macaque model, we set out to study the impact of underlying infection  
53 with HSV-2 or treatment with the adjuvant polyICLC on rectal immunization with the live  
54 attenuated vaccine SIV $\Delta$ Nef. We found that neither stimulus impacted complete protection from  
55 SIV; however, the combination of HSV-2 and polyICLC improved control of infection in animals  
56 that were not completely protected. Compared with non-controller macaques, controllers had  
57 less inflammatory T cells before SIV challenge as well as greater gene expression of IFN $\alpha$  and  
58 more functional SIV-specific T cells after infection. The results add to our understanding of the  
59 mechanisms of SIV $\Delta$ Nef protection and demonstrate that mucosal immune activation does not  
60 necessarily undermine protection in mucosal vaccination against HIV.

61

## 62 **INTRODUCTION**

63 Designing an efficacious HIV vaccine is a difficult task by any measure due to the high level of  
64 viral diversity, immune escape, and early seeding of cellular and anatomical viral reservoirs. Any  
65 efforts that can reduce the barriers to efficacy should be considered. Mucosal vaccines offer  
66 advantages over parenteral vaccines in their enhanced ability to position antigen-specific  
67 immune responses where they are needed to curb sexual transmission (1). However, vaccine-  
68 associated immune activation in the mucosa, including that provided by the adjuvants employed  
69 to augment and focus the immune response and by underlying co-infections, may have the  
70 undesired side effect of increasing available target cells for HIV infection. When lack of efficacy  
71 and enhancement of HIV acquisition were found in large-scale clinical trials of Adenovirus (Ad)-  
72 based HIV vaccines (2, 3), a link with mucosal T cell activation was hypothesized (4, 5). Given

73 the potential dichotomy between appropriate and pathological mucosal immune activation, it is  
74 critical to tease out the impacts of mucosal stimuli on HIV vaccine efficacy.

75 As a model system to address the question, we used the SIVmac239 $\Delta$ Nef (SIV $\Delta$ Nef)  
76 live attenuated vaccine (LAV). SIV $\Delta$ Nef is among the best characterized SIV vaccines in  
77 macaques and a benchmark for the potency of protective immunity that should be elicited by an  
78 efficacious (but safer) HIV vaccine in humans. SIV $\Delta$ Nef engages multiple arms of the immune  
79 system, including humoral and T cell-mediated responses and even mucosal immunity in  
80 response to systemic vaccination (6-9). Thus, it represents an excellent choice for examining  
81 the effect of immune stimuli on different components of protection. While a number of studies  
82 have found that high-dose intravenous SIV $\Delta$ Nef immunization completely protects macaques  
83 against intravenous or mucosal SIV challenge (6-14), we have shown that mucosal  
84 immunization with a lower dose of SIV $\Delta$ Nef via the rectal mucosa is less efficient in blocking  
85 rectal SIV transmission (15). The presence of breakthrough infections within an immunized  
86 cohort allows for the examination of factors that improve or disrupt immunity. Throughout the  
87 large body of literature on immunization of macaques with LAVs including SIV $\Delta$ Nef, a number of  
88 correlates of vaccine protection have been identified, including persistence of the LAV (6),  
89 especially in the PD-1<sup>+</sup>CXCR5<sup>+</sup>CD200<sup>+</sup> T follicular helper (Tfh) cell subset of CD4 T cells that  
90 reside within the lymph node B cell follicles (16). This antigen persistence is thought to drive the  
91 production of the effector differentiated SIV-specific T cells (6, 8) and antibodies (6, 7, 9) that  
92 have been correlated with protection.

93 To explore the impact of mucosal stimulation on rectal mucosa SIV $\Delta$ Nef immunization  
94 and challenge in macaques (15, 17), we selected polyI:CLC and herpes simplex virus-2 (HSV-2)  
95 as model stimuli with divergent mechanisms of cell activation and potentially divergent  
96 immunological effects. PolyI:CLC is an adjuvant that activates dendritic cells (DCs) and T cells  
97 (15, 18-20), and we found that rectal administration of polyI:CLC just prior to SIV $\Delta$ Nef improves  
98 protection against SIV challenge (15). Infection with HSV-2 in humans confers a 3-fold

99 enhancement in HIV infection risk (21) through mechanisms including mucosal inflammation,  
100 upregulation of HIV receptors, and recruitment and persistence of HIV target cells in the genital  
101 and anorectal mucosa (17, 22-28). HSV-2 infection in rhesus macaques recapitulates many of  
102 the features of infection in humans but is less pathogenic with a more restricted pattern of  
103 shedding (22, 29-31). Nonetheless, high dose vaginal and rectal HSV-2 inoculation in  
104 macaques creates a pro-inflammatory state with T cell activation in mucosa and blood (23, 24)  
105 that mirrors similar findings in humans (28). Moreover, in opposition to the effect of polyICLC,  
106 post-vaccination acute rectal HSV-2 infection in macaques dampened the protective efficacy of  
107 SIV $\Delta$ Nef in association with increased mucosal inflammation (17).

108 In the current study, we utilized a repeated low dose HSV-2 infection model together  
109 with polyICLC to generate a matrix of differing types of immune activation and differing  
110 associated levels of protection that could facilitate understanding how immune activation  
111 impacts protection by SIV $\Delta$ Nef and possibly uncover novel correlates of protection. Testing of  
112 how an underlying low virulence rectal HSV-2 infection impacts SIV $\Delta$ Nef efficacy in macaques  
113 might also inform on the impact of subclinical human HSV-2 infection on mucosal HIV vaccines.

114 We found that both HSV-2 infection and polyICLC increased acquisition of SIV $\Delta$ Nef  
115 (vaccine take) following a low dose intrarectal inoculation. Notably, in animals in which there  
116 was a take of the SIV $\Delta$ Nef, neither HSV-2 nor polyICLC pre-treatment impacted the elicitation of  
117 complete protection by SIV $\Delta$ Nef. However, the combination of both mucosal stimuli boosted the  
118 control of SIV in animals with breakthrough infection, revealing a novel partial protection  
119 “controller” phenotype. In this model, control (vs. non-control) was not directly predicted by  
120 SIV $\Delta$ Nef persistence but rather by increased IFN $\alpha$  production during acute SIV infection as well  
121 as a heightened frequency of CXCR5<sup>high</sup> CD4 T cells in blood, despite a lower frequency of such  
122 cells in lymph nodes and a lower frequency of Tfh cells. Controllers also exhibited lower  
123 expression of CD40L on their SIV-specific CD8 T cells than completely protected macaques.  
124 Moreover, we found a monofunctional CD8 T cell response in non-controllers that was not seen

125 in controllers or completely protected macaques. Our results reinforce the importance of T cell  
126 functionality and tissue localization, as well as an aptly timed innate response in control of SIV  
127 infection. This provides a platform for future testing of the importance of immune modifying  
128 conditions on HIV vaccine outcomes.

129

130

## 131 **RESULTS**

### 132 **Rectal HSV-2 infection and polyICLC treatment promote an SIV controller phenotype in** 133 **breakthrough infections in SIV $\Delta$ Nef mucosal vaccinees.**

134 We evaluated the impact of two mucosal stimuli – HSV-2 and polyICLC – on rectal SIV $\Delta$ Nef-  
135 mediated protection from SIVmac239 in a cohort of 31 rhesus macaques. The macaques were  
136 divided in 4 treatment groups: control (n=10), HSV-2 (n=11), polyICLC (n=4), and HSV-  
137 2/polyICLC (n=6) (**Fig. 1A**). We hypothesized that HSV-2 would exert an immune activating  
138 effect, undermining SIV $\Delta$ Nef-mediated protection and that polyICLC would boost protection and  
139 possibly buffer dysregulating effects of HSV-2. A 10-week regimen of twice-weekly mucosal  
140 treatments with  $10^7$  pfu of HSV-2 and/or 1mg of polyICLC was employed. This regimen was  
141 used to mimic physiological conditions, which may include accumulated effects of repeated  
142 exposure to immunomodulatory agents such as HSV-2. In addition, we previously found that  
143 repeated vaginal exposure to  $10^7$  pfu of HSV-2 (together with lentivirus) was associated with  
144 sustained HSV-2 shedding in the macaques' vaginal mucosa (29, 30). Since we aimed to  
145 maximize the effects of stimuli and predicted that frequent shedding would more strongly  
146 undermine SIV $\Delta$ Nef-mediated protection, we followed a similar challenge protocol herein.  
147 Following the treatment regimens, all macaques were exposed rectally to  $1 \times 10^3$  TCID<sub>50</sub>  
148 SIV $\Delta$ Nef. In contrast to higher dose mucosal exposures or intravenous inoculation with  
149 SIV $\Delta$ Nef, which results in near universal take of SIV $\Delta$ Nef and associated protection, this low  
150 dose of the vaccine was utilized in order to create a control group of animals that were exposed

151 to the stimuli and vaccine but did not become infected with SIV $\Delta$ Nef (no vaccine take) and to  
152 observe effects of the stimuli on vaccine take (15). As we were unable to exclude or fully  
153 balance the inclusion of protective MHC alleles between groups (**Fig. S1**), we present the data  
154 concerning SIV protection and pathogenesis for all animals (**Fig. 1-9**) as well as for the subset  
155 of animals lacking the Mamu A\*01, B\*08, and B\*17 alleles (MHC censored data in **Supporting**  
156 **Information**).

157 In the untreated group, low-dose rectal immunization resulted in SIV $\Delta$ Nef infection  
158 (vaccine take, SIV $\Delta$ Nef+) in 60% of the macaques (**Table 1, Fig. 1B**), similar to our previous  
159 observations (15). Immunological stimulation of the rectal mucosa with HSV-2 or polyICLC prior  
160 to SIV $\Delta$ Nef exposure significantly enhanced vaccine take, increasing the proportion of  
161 SIV $\Delta$ Nef+ animals (**Table 1, Fig. 1B**). We then challenged all macaques rectally with  $3 \times 10^3$   
162 TCID<sub>50</sub> of virulent SIVmac239 and followed them for 16 weeks. Because both SIV $\Delta$ Nef and SIV  
163 are detected by standard quantification of gag RNA, we evaluated the effects of pre-vaccination  
164 treatment on protection by quantifying nef RNA to detect the intact Nef (in the challenge virus  
165 SIVmac239) or the region spanning the nef deletion (in the SIV $\Delta$ Nef LAV) (15, 17, 32). Overall,  
166 half (3/6) of the control group SIV $\Delta$ Nef+ macaques showed no evidence of SIVmac239  
167 challenge virus infection (“complete protection”, defined by no time point with SIVmac239  
168 plasma virus RNA >30 copies/ml plasma) while the other half became infected with levels of  
169 SIVmac239 plasma viremia similar to unvaccinated controls (**Table 1, Fig. 1C,D,E**). Complete  
170 protection was neither improved nor impaired significantly by mucosal stimulation (**Table 1, Fig.**  
171 **1C,D,E**).

172

173

174

175

176

177 **Table 1. Protection from SIVmac239 in SIVΔNef vaccinated macaques.**

| Group               | ΔNEF+        | Protection from WT |                 |                 |            |    |    |                |    |    |                |    |    |
|---------------------|--------------|--------------------|-----------------|-----------------|------------|----|----|----------------|----|----|----------------|----|----|
|                     |              | Complete           |                 |                 | Controller |    |    | Any Protection |    |    | Non Controller |    |    |
|                     |              | Total              | 13 <sup>a</sup> | 31 <sup>a</sup> | Total      | 13 | 31 | Total          | 13 | 31 | Total          | 13 | 31 |
| Untreated           | 6/10 (60%)   | 3/6 (50%)          | 3               | 0               | 0/6 (0%)   | 0  | 0  | 3/6 (50%)      | 3  | 0  | 3/6 (50%)      | 1  | 2  |
| HSV-2               | 11/11 (100%) | 6/11 (55%)         | 4               | 2               | 2/11 (18%) | 1  | 1  | 8/11 (73%)     | 5  | 3  | 3/11 (27%)     | 2  | 1  |
| PICLC               | 4/4 (100%)   | 1/4 (25%)          | 0               | 1               | 2/4 (50%)  | 0  | 2  | 3/4 (75%)      | 0  | 3  | 1/4 (25%)      | 0  | 1  |
| HSV-2/PICLC         | 5/6 (83%)    | 2/5 (40%)          | 1               | 1               | 3/5 (60%)  | 1  | 2  | 5/5 (100%)     | 2  | 3  | 0/5 (0%)       | 0  | 0  |
| <b>MHC Censored</b> |              |                    |                 |                 |            |    |    |                |    |    |                |    |    |
| Untreated           | 5/10 (50%)   | 2/5 (40%)          | 2               | 0               | 0/5 (0%)   | 0  | 0  | 2/5 (40%)      | 2  | 0  | 3/5 (60%)      | 1  | 2  |
| HSV-2               | 9/9 (100%)   | 5/9 (55%)          | 3               | 2               | 1/9 (11%)  | 0  | 1  | 6/9 (67%)      | 3  | 3  | 3/9 (33%)      | 2  | 1  |
| PICLC               | 1/1 (100%)   | 1/1 (100%)         | 0               | 1               | 0/1 (0%)   | 0  | 0  | 1/1 (100%)     | 0  | 1  | 0/1 (0%)       | 0  | 0  |
| HSV-2/PICLC         | 3/6 (50%)    | 1/3 (33%)          | 1               | 0               | 2/3 (67%)  | 1  | 1  | 3/3 (100%)     | 2  | 1  | 0/3 (0%)       | 0  | 0  |

<sup>a</sup>Macaques in the column labeled “13” were challenged with SIV 13 weeks after SIVΔNef vaccination. Macaques in the column labeled “31” were challenged with SIV 31 weeks after SIVΔNef vaccination.

178

179 In contrast, mucosal stimulation by HSV-2, polyICLC, or both prior to vaccination was

180 associated with the appearance of a partial protection “controller” phenotype that was absent in

181 untreated animals (**Table 1, Fig. 1C,D,E**). Partial protection with relative control of viral

182 replication (“controller”) was defined as SIVmac239 challenge virus infection with rapid post-

183 acute containment and maintenance of plasma viremia <10<sup>4</sup> RNA copies/ml (**Fig. 1D,E,F**). Two

184 macaques that marginally fit these criteria were considered controllers – JG86 had higher peak

185 viral load than the rest but experienced rapid decline in viremia and contained peripheral SIV

186 replication to < 30 copies/mL by 16 weeks post infection (the last time point sampled); IJ50 had

187 low peak viral load and rapid containment to less than 100 RNA copies/ml from weeks 4-8 post

188 infection but then experienced resurgence of SIV plasma viremia at weeks 12 and 16 (**Fig. 1D**).

189 Nonetheless, plasma SIV viral load in IJ50 was still a Log lower than in most non-controllers and

190 several Logs lower than in unvaccinated macaques at week 16 (**Fig. 1F**); thus, IJ50 was

191 grouped with the controllers. Controller status associated with protective MHC alleles was only

192 seen in 25-50% of unvaccinated animals. The combination of HSV-2 and polyICLC resulted in

193 the greatest frequency of controller macaques (**Table 1, Fig.1C,D**) and “any protection”,

194 categorized as complete protection or control (**Table 1, Fig. 1C**). Although the controller

195 phenotype was potentially due in part to MHC haplotype, when macaques with known protective

196 Mamu alleles were censored, the controller phenotype was still most prevalent among HSV-



197 2/polyICLC-treated macaques (**Table 1, Fig. S1, Fig. S2**), indicating a role for the stimuli. The  
198 impact of polyICLC alone on the controller phenotype could not be evaluated in the MHC  
199 censored dataset as only one polyICLC-treated macaque was negative for all three alleles.  
200 However, the controller phenotype was more prevalent within the HSV-2/polyICLC group than  
201 the HSV-2 group, suggesting a role for polyICLC (**Fig. S2**).

202 The study was executed in two parts (**Table 1, Fig. S1**). The first set of macaques was  
203 challenged 13 weeks post-SIV $\Delta$ Nef to mirror our previous study (15). Upon noting the  
204 emergence of the controller phenotype, we held the second set longer before challenge (31  
205 weeks) to determine if this phenotype was related to incomplete maturation of the immune  
206 response 13 weeks post-SIV $\Delta$ Nef (10, 33, 34). However, in this low dose rectal SIV $\Delta$ Nef  
207 inoculation model, increasing the time between vaccination and challenge from 13 to 31 weeks  
208 neither increased the proportion of completely protected or controller macaques in the untreated  
209 group nor changed the course of viremia in SIVmac239 challenge virus infected macaques  
210 (**Table 1, Fig. S1**). This agrees with the shorter time to maturation of immunity against the  
211 homologous SIVmac239 vs heterologous challenge strains (35). Thus, we grouped animals  
212 from 13 and 31 weeks for further analyses.

213 Protection groupings based on plasma viral load were corroborated through  
214 measurements of SIVmac239 challenge virus DNA in lymphoid and mucosal tissues at the time  
215 of euthanasia, 16 weeks post-SIV challenge, assessed by quantitation of SIV Nef DNA (**Fig. 2**).  
216 As expected, completely protected macaques had no detectable SIVmac239 Nef DNA in  
217 axillary, mesenteric, or iliac lymph nodes, colorectal tissue, or gut mucosa. Non-controllers and  
218 unvaccinated macaques alike had high levels of SIV DNA in all tissues. Controllers varied in  
219 their level of tissue SIVmac239 Nef DNA with tissue SIV DNA viral load generally following  
220 plasma SIV RNA viral load (**Fig. 2, Fig. 1D,F**). IJ50 in the HSV-2 group was viremic with  
221 SIVmac239 Nef DNA detected at the time of necropsy, but SIVmac239 Nef DNA was only  
222 detected in the mesenteric lymph node among the tissues studied. In the MHC-censored

223 dataset, the trends were the same but only one of the controllers had SIVmac239 Nef DNA  
224 detected in tissues at necropsy, the HSV-2/polyICLC-treated macaque ID90 (**Fig. S3**).

225 We further explored the degree of protection by examining CD4 T cell loss. Like  
226 completely protected macaques, controllers preserved their peripheral CD4 T cells while non-  
227 controllers lost over half of them, even more than non-vaccinated animals (**Fig. 3A**). In jejunum  
228 obtained from the SIV infected animals challenged 31 weeks post-SIV $\Delta$ Nef, we found that fewer  
229 live cells, fewer CD4 T cells among the live cells, and a more activated CD4 T cell phenotype  
230 (CD69+) tended to be present in animals with a lower degree of protection (**Fig. 3B**).  
231 Examination of the frequency of jejunum CD4 T cells secreting IFN- $\gamma$ , IL-17, and IL-22 in  
232 response to mitogen stimulation revealed that controllers, but not non-controllers, also  
233 preserved their functional CD4 T cells, especially the Th17, Th1Th17, and Th17Th22 subsets in  
234 the gut at similar levels to the completely protected macaques (**Fig. 3C,D**). There was no  
235 difference in the frequency of CD8 T cells secreting the same cytokines (not shown). Peripheral  
236 T cell loss and gut T cell phenotype followed the same pattern in the MHC-censored dataset.  
237 Notably, the Th1 preservation was driven by animals with protective MHC alleles while IL-17  
238 and IL-22 secreting cells were preserved in controllers without protective MHC alleles (**Fig. S4**).  
239 Overall, gut T cell function was somewhat reduced in the MHC-censored controllers compared  
240 to the total, suggesting a more prominent role for MHC-mediated protection in preserving gut T  
241 cell function. Taken together, these analyses indicate that both repeated low-dose rectal HSV-2  
242 inoculation and repeated polyICLC treatment preceding SIV $\Delta$ Nef boosted vaccine uptake, and  
243 the combination of these stimuli in particular increased control of SIV replication in animals with  
244 breakthrough SIVmac239 challenge virus infection, which was associated with protection from  
245 gut CD4 T cell loss.

246

247 **Minimally virulent rectal HSV-2 infection elicits systemic type I IFN (IFN I) signaling that**  
248 **contributes to SIV control.**

249 Although rectal HSV-2 infection increased SIV $\Delta$ Nef infection (vaccine take), it did not reduce  
250 protection from wild type SIV and possibly improved protection, especially when administered  
251 together with polyI $\Delta$ CLC. Thus, we investigated HSV-2 shedding and innate immune responses  
252 in HSV-2 exposed macaques to appreciate the level of HSV-2 infection and understand if innate  
253 responses to HSV-2 could have aided protection from SIV. We detected HSV-2 DNA in rectal  
254 swabs from all but one of the HSV-2 exposed macaques (IN31 in the HSV-2/polyI $\Delta$ CLC group)  
255 on at least one of the time points sampled (despite lacking samples during the vaccination  
256 phase of those animals challenged 13 weeks post-SIV $\Delta$ Nef) (**Fig. 4A**). In macaques infected  
257 rectally with HSV-2 in the absence of polyI $\Delta$ CLC, shedding recurred infrequently during the study  
258 but over at least 25 weeks after the final HSV-2 inoculation, including in response to rectal  
259 mucosa biopsy especially in SIVmac239 infected animals (**Fig. 4A**).

260 PolyI $\Delta$ CLC significantly inhibited HSV-2 shedding over the course of the study. Twenty-  
261 four hours after the 20<sup>th</sup> HSV-2 challenge, the level of HSV-2 DNA detected in rectal swabs was  
262 not significantly different between the HSV-2 and HSV-2/polyI $\Delta$ CLC groups, though it tended to  
263 be less in macaques treated with polyI $\Delta$ CLC (**Fig. 4A,B**). Analysis of all later time points revealed  
264 that animals treated with polyI $\Delta$ CLC shed HSV-2 significantly less frequently and had less HSV-2  
265 DNA in their swabs at shedding times than those not treated with polyI $\Delta$ CLC (**Fig. 4A,C**). In fact,  
266 only one of the HSV-2/polyI $\Delta$ CLC animals (GL42) was shedding at any of the times examined  
267 past 24 hours (**Fig. 4A**). During just the post-SIVmac239 challenge phase (when samples were  
268 available from all animals) significantly fewer of the polyI $\Delta$ CLC treated animals experienced  
269 shedding, and the frequency and level of shedding in polyI $\Delta$ CLC treated animals were both  
270 reduced (**Fig. 4D**). In agreement with the greatest control of breakthrough infection with  
271 SIVmac239 seen in HSV-2/polyI $\Delta$ CLC treatment, shedding appeared to associate inversely with  
272 SIV protection status, especially in the non-polyI $\Delta$ CLC treated animals (**Fig. 4A**). During the  
273 period following SIV challenge, the frequency of shedding trended with the severity of SIV  
274 infection though too few macaques were studied to detect a significant effect (**Fig. 4E**).

275 Further evidence that repeated low dose rectal HSV-2 inoculation resulted in a less  
276 virulent infection than high dose inoculation came by examining the impact of HSV-2 on the  
277 rectal mucosa. The macaques exhibited little acute rectal inflammatory response to repeated  
278 low dose HSV-2 (**Fig. S5**), which contrasts the response to a single high dose inoculation (17).  
279 In particular, CXCL8 was not elevated in swabs taken 24 hours after the final inoculation. Low  
280 dose rectal HSV-2 infection also failed to increase rectal T cell activation in biopsies collected 8  
281 weeks post-SIV $\Delta$ Nef. Expression of CD69, CCR5, CCR6, CCR7, and  $\alpha_4\beta_7$  integrin on memory  
282 CD4 T cells were unaltered or potentially decreased by HSV-2 at this time point (**Fig. S5**), in  
283 contrast to what has been shown following single high dose mucosal HSV-2 inoculation (17,  
284 24).

285 We next examined if HSV-2 infection had systemic effects despite minimal mucosal  
286 responses. In plasma 24 hours after the final treatment, levels of multiple inflammatory soluble  
287 factors were unaffected by HSV-2 though IL-2 was decreased by all treatments and CXCL9 and  
288 CCL11 were increased in plasma in association with the controller phenotype (ie. Highest level  
289 in HSV-2/polyICLC treated macaques) (**Fig. S5**). In PBMCs, we also studied gene expression  
290 relevant to the IFN I pathway, which is involved in the immune response to both HSV-2 and  
291 polyICLC. We quantified transcripts of two transcription factors (*IRF3* and *IRF7*) (36-38)  
292 involved in the induction of IFN responses to HSV infection and polyICLC, two IFN-induced  
293 innate antiviral proteins (*TRIM5 $\alpha$*  and *IFI16*) associated with restriction of both HIV (39, 40) and  
294 HSV (41-43), and *IFN $\alpha$* . Seven days after the last mucosal treatment (the day of vaccination),  
295 IFN I related transcripts were elevated in PBMCs isolated from HSV-2 infected macaques,  
296 especially *IRF3*, *TRIM5 $\alpha$* , and *IFI16*, whereas polyICLC had little effect (**Fig. 5A**). One week  
297 later when responses reflected both treatment and acute innate response to SIV $\Delta$ Nef, increased  
298 systemic expression of IFN I related genes was still related predominantly to HSV-2 infection,  
299 and polyICLC may have even dampened *TRIM5 $\alpha$*  expression (**Fig. 5B**). However, *IRF3*,  
300 *TRIM5 $\alpha$* , and *IFI16* were all increased in the HSV-2/polyICLC group compared to Untreated

301 macaques. Although IFN I responses at these time points did not correlate with eventual  
302 protection from SIV, at 2 weeks post SIV challenge, the expression of *IFN $\alpha$*  was increased in the  
303 controller group compared with either the completely protected or non-controller groups in  
304 parallel with the increased frequency of controller phenotype by treatment group (HSV-  
305 2/polyICLC > polyICLC > HSV-2 > Untreated) (**Fig. 5C**). Thus, polyICLC reduced HSV-2  
306 shedding in the absence of a detectable systemic IFN I response at the times examined,  
307 whereas low-virulence HSV-2 infection itself triggered a systemic IFN I response despite little  
308 shedding or mucosal immune dysfunction at the times examined. Acute systemic IFN $\alpha$   
309 production, which was elevated in macaques treated with mucosal stimuli, was associated with  
310 SIVmac239 control in SIV+ animals.

311

### 312 **SIV $\Delta$ Nef persists in lymph nodes of non-controllers but not controllers.**

313 In past studies using intravenous immunization with either intravenous or vaginal challenge, the  
314 measured levels of LAV, especially in lymph nodes, correlated with protection from virulent SIV  
315 challenge (6, 8, 44). We also previously found in our rectal immunization model that polyICLC  
316 increased levels of SIV $\Delta$ Nef viremia in association with increased protection from SIV (15). If  
317 SIV $\Delta$ Nef persistence was boosted through mucosal stimulation, this would provide a strong  
318 predictor of protection differentiating controllers from non-controllers and (together with  
319 increased acute IFN $\alpha$ ) explain the controller phenotype.

320 In this unique model of SIV $\Delta$ Nef immunization across the rectal mucosa, we found that  
321 some of the completely protected macaques exhibited a transient SIV $\Delta$ Nef viremia throughout  
322 the time post-vaccination before SIVmac239 challenge (the vaccination phase) while others  
323 exhibited ongoing SIV $\Delta$ Nef viremia throughout the vaccination phase (**Fig. 6A,B**). In contrast, all  
324 controllers rapidly controlled SIV $\Delta$ Nef to <30 copies/mL plasma after a peak of replication in  
325 plasma (**Fig. 6A,B**). Non-controllers exhibited overlapping SIV $\Delta$ Nef plasma viral loads to the  
326 completely protected animals (**Fig. 6A,B**). Peak SIV $\Delta$ Nef viral loads were the same among the

327 protected, controller, and non-controller groups, diverging in the post-acute period by 8 weeks  
328 post-vaccination through to the time of SIV challenge (**Fig. 6C**). Instead, peak SIV $\Delta$ Nef loads  
329 stratified by treatment; HSV-2 alone and not polyICLC (or the HSV-2/polyICLC combination)  
330 significantly increased SIV $\Delta$ Nef peak viral load (**Fig. 6D**). These trends were preserved in the  
331 MHC-censored dataset (**Fig. S6**).

332 Following SIV challenge, some of the completely protected macaques (those that had  
333 low to undetectable SIV $\Delta$ Nef viral load prior to SIV challenge) experienced an early resurgence  
334 of SIV $\Delta$ Nef RNA in plasma (**Fig. 6E**). By contrast controllers, which also had undetectable  
335 SIV $\Delta$ Nef viral load at the time of challenge, maintained SIV $\Delta$ Nef viremia <30 copies/mL plasma  
336 throughout the SIVmac239 challenge phase. Non-controllers exhibited an early and sustained  
337 decline in SIV $\Delta$ Nef regardless of their pre-challenge SIV $\Delta$ Nef viral load and concomitant with  
338 the development of SIVmac239 viremia. Paralleling their loss of SIV $\Delta$ Nef RNA from blood post-  
339 SIV challenge, non-controllers' tissues contained no SIV $\Delta$ Nef DNA at the time of euthanasia 16  
340 weeks post-challenge (**Fig. 6F**). Controllers also had little SIV $\Delta$ Nef DNA in tissues at euthanasia  
341 whereas completely protected animals had detectable SIV $\Delta$ Nef DNA in lymph nodes and  
342 mucosa, most prominently in the gut-draining mesenteric lymph nodes. Presence of SIV $\Delta$ Nef  
343 DNA in completely protected macaques was as expected based on prior association between  
344 SIV $\Delta$ Nef persistence and protection (8).

345 Lack of SIV $\Delta$ Nef DNA in tissues during chronic SIV infection in SIV+ macaques could  
346 have reflected replacement by SIV; alternatively, the loss of SIV $\Delta$ Nef in tissues could have  
347 preceded and facilitated SIV infection in non-controllers. To test the hypothesis that the extent of  
348 SIV protection was correlated with SIV $\Delta$ Nef persistence in tissues prior to SIV challenge, we  
349 examined  $\Delta$ Nef DNA in rectal biopsies taken 8 weeks post-vaccine. Unexpectedly, we detected  
350 similar copy numbers of SIV $\Delta$ Nef DNA between non-controllers and completely protected  
351 macaques (and more non-controllers than protected macaques had detectable SIV $\Delta$ Nef DNA,  
352 **Fig. 6G**). We also detected less SIV $\Delta$ Nef DNA in controllers, paralleling RNA levels in plasma.

353 In PBMCs from the same 8 weeks post-vaccine time point, SIV $\Delta$ Nef DNA levels followed the  
354 same pattern (**Fig. 6G**). These trends were also preserved in the MHC-censored dataset (**Fig**  
355 **S6**).

356 Since the presence of SIV $\Delta$ Nef DNA may not reflect ongoing SIV $\Delta$ Nef replication, we  
357 measured inducible replication competent virus in lymph nodes collected 29 weeks post-  
358 vaccination (2 weeks before SIV challenge) by culturing isolated lymph node mononuclear cells  
359 (LNMCs) with the susceptible CEMx174 cell line (**Fig. 7A**). We examined gag p27 production  
360 within cells (**Fig. 7B**) and secretion into culture supernatant (**Fig. 7C**). In accordance with the  
361 levels of pre-challenge SIV $\Delta$ Nef RNA measured in plasma and DNA in PBMCs and rectal  
362 mucosa, SIV $\Delta$ Nef grew in cultures containing LNMCs from both completely protected and non-  
363 controlling macaques. Of note, the growth tended to be lower overall in non-controllers than  
364 completely protected animals, especially when animals possessing protective MHC alleles were  
365 censored (**Fig. S7**), and the data represent a snapshot after 21 days of culture. Still it is  
366 noteworthy that no SIV $\Delta$ Nef grew in co-cultures containing LNMCs from controller macaques  
367 (**Fig. 7A,B,C**). No replication competent virus was detected in co-cultures containing PBMCs  
368 (**Fig. 7A, not shown**). These findings demonstrate that in this rectal model, SIV $\Delta$ Nef persists in  
369 blood plasma, PBMCs, mucosa, and lymph nodes of protected macaques. However, this  
370 persistence, which includes replication competent SIV $\Delta$ Nef in lymph nodes close to the time of  
371 SIV challenge, is not sufficient for complete protection from rectal SIV challenge. Neither is it  
372 necessary or sufficient for protection from disease.

373

#### 374 **Lack of control predicted by pro-inflammatory, poorly functional T cell environment.**

375 We assessed the phenotype of CD4 T cells (**Fig. 8A**) in PBMCs and LNMCs from 2 weeks  
376 before SIV challenge with the goal to identify immunophenotypic patterns that distinguished  
377 completely protected macaques from non-controllers and to uncover novel phenotypes  
378 associated with control. Tfh cells (PD-1<sup>high</sup>CD200<sup>+</sup> or PD-1<sup>high</sup>CXCR5<sup>+</sup> CD4 T cells) within



379 LNMCs have been shown to be a haven for HIV/SIV replication including SIV $\Delta$ Nef and SIV in  
380 elite controller macaques (8, 16). In our cohort, the frequency of cells with a Tfh phenotype in  
381 blood and lymph nodes (identified as PD-1<sup>high</sup>CD200<sup>+</sup>CXCR5<sup>+</sup>, **Fig. 8B,C**) correlated with  
382 SIV $\Delta$ Nef plasma viral load as expected (**Fig. 8D,E**). A population of PD-1<sup>low</sup>CD200<sup>+</sup>CXCR5<sup>+</sup>  
383 cells having high CXCR5 expression was also identified in lymph nodes (**Fig. 8B,F**). These PD-  
384 1<sup>low</sup> follicle homing cells, which have been shown to be Tfh precursors that support neutralizing  
385 antibody development (45), were present at highest frequency in the completely protected  
386 macaques (**Fig. 8G**). When we looked at all follicle-homing memory CD4 T cells  
387 (CD95<sup>+</sup>CXCR5<sup>+</sup>) with high CXCR5 expression (**Fig. 8H**), we found that these cells were more  
388 frequent in the blood of controllers than the other groups even though controllers had fewer Tfh  
389 cells, fewer PD-1<sup>low</sup> Tfh precursors, and fewer CXCR5<sup>high</sup> CD4 T cells in lymph nodes (**Fig. 8I**).  
390 These CXCR5<sup>high</sup> cells in blood (but not lymph nodes) displayed an increasingly CXCR3<sup>+</sup>CCR6<sup>+</sup>  
391 Th1Th17-like phenotype in macaques with less protection (**Fig. 8J,K**). There was no apparent  
392 difference in the frequency of either CXCR3<sup>+</sup>CCR6<sup>-</sup> or CXCR3<sup>-</sup>CCR6<sup>+</sup> cells between the groups  
393 (not shown). Similarly within the whole CD4 T cell population, macaques with less protection  
394 tended to have a greater frequency of CXCR3<sup>+</sup>CCR6<sup>+</sup> cells in blood (**Fig. 8L,M**). These  
395 observations were similar in the MHC-censored dataset (**Fig. S8**).

396         Altered CXCR5<sup>+</sup> CD4 T cell frequencies suggested a potential role for antibody  
397 maturation in the controller phenotype. However, when we measured the titer of SIV-specific  
398 antibodies in plasma on the day of challenge, we found that antibody titer followed SIV $\Delta$ Nef  
399 viremia (**Fig. 9A-C**) and did not correlate with peak SIV<sub>mac239</sub> viremia in SIV+ macaques (**Fig.**  
400 **9D, Fig. S9**).

401         We hypothesized that lack of control, which was associated with elevated Th1Th17 cell  
402 frequency, may be due to a dysregulated or inferior T cell response to SIV even though  
403 SIV $\Delta$ Nef was replicating in the non-controller macaques at the time of SIV challenge. We  
404 examined SIV-specific T cells 7 days post-SIV challenge, in order to observe boosted pre-



405 existing responses without yet seeing *de novo* responses. Although SIV-specific T cell  
406 responses to SIV gag and env peptide pools were low, especially in the CD4 compartment (**Fig.**  
407 **S10**), we found in both the CD8 and CD4 T cell compartments that completely protected and  
408 non-controller macaques possessed a similar frequency of IFN $\gamma$ -producing cells while  
409 controllers tended to have fewer of these cells, paralleling SIV $\Delta$ Nef persistence (**Fig. 10A,B,**  
410 **Fig. S10**). However, non-controllers' T cells produced less TNF $\alpha$  than T cells from protected  
411 macaques, and IFN $\gamma$  contributed most to their overall gag/env-specific CD8 T cell cytokine  
412 production (**Fig. 10C**). Similarly in the MHC censored data set, non-controllers had an IFN $\gamma$ -  
413 dominant gag/env T cell response. In the full dataset, we noted that CD40L expression was  
414 minimal on SIV-specific T cells from non-controllers compared with controllers and completely  
415 protected macaques, most notably in the CD8 compartment (**Fig. 10B**). However, CD40L  
416 effects in controllers were related to protective MHC alleles, and when the animals possessing  
417 these alleles were censored, controllers and non-controllers both exhibited low CD40L on their  
418 antigen-specific T cells in comparison with completely protected animals (**Fig. S11**). Thus  
419 CD40L on CD8 T cells may contribute to the difference between controllers and completely  
420 protected macaques. Low CD40L expression in SIV+ animals was not global as  
421 PMA/ionomycin-stimulation increased CD40L in all animals similarly (**Fig. 10D**).

422

423

## 424 **DISCUSSION**

425 Adjuvants are a key element of successful vaccines and can promote increased vaccine  
426 efficacy by inducing certain kinds of immune activation. Yet paradoxically, agents that induce  
427 mucosal immune activation may undermine the efficacy of HIV vaccines because immune  
428 activation can increase HIV susceptibility by generating and recruiting permissive target cells for  
429 the virus. We set out to evaluate the impact of opposing triggers of immune activation on the  
430 SIV $\Delta$ Nef vaccine using a mucosal vaccination/challenge model. We hypothesized that HSV-2

431 infection would impair SIV $\Delta$ Nef-mediated immune responses whereas polyICLC would boost  
432 immune responses and potentially limit postulated HSV-2 mediated dysfunction. Unexpectedly,  
433 we found that neither HSV-2 nor polyICLC impacted complete protection by SIV $\Delta$ Nef but both  
434 promoted partial control of breakthrough SIVmac239 infections in SIV $\Delta$ Nef vaccinated animals,  
435 with the most pronounced control in animals that received both immune modulating stimuli in  
436 conjunction with SIV $\Delta$ Nef vaccination.

437         HSV-2 infection inflames the mucosa with cytokine secretion and recruitment of immune  
438 cells and impairs the immunostimulatory capacity of DCs to induce T cell responses (46-52).  
439 The IFN I pathway is involved in initial control of HSV and SIV infections (53), and IFN- $\alpha$  was  
440 shown to blunt SIV infection (53) while plasma IFN- $\alpha$  during chronic infection is also a hallmark  
441 of HIV/SIV systemic immune activation (54-60). IFN I responses are also triggered by polyIC  
442 and polyICLC (15, 18, 19, 61, 62), and polyIC was shown to blunt HSV-2 infection in a mouse  
443 genital infection model (63, 64). As used in our study, low dose repeated mucosal HSV-2  
444 exposure elicited a minimal mucosal innate response even though macaques shed the virus  
445 intermittently throughout the follow up period. Negligible mucosal inflammation may explain why  
446 HSV-2 infection did not undermine SIV $\Delta$ Nef mediated protection. The repeated inoculation  
447 regimen with  $10^7$  pfu HSV-2 per challenge was based on our previous finding that this approach  
448 augmented shedding following vaginal infection in contrast to a single inoculation with  $2 \times 10^8$   
449 pfu (29, 30). However, in that study, HSV-2 was inoculated as a co-challenge with SHIV  
450 vaginally, and that may have facilitated more frequent and greater magnitude HSV-2 shedding.  
451 While it may be that HSV-2 infection is less virulent in macaques rectally than vaginally,  
452 previous studies found that rectal single high dose HSV-2 inoculation resulted in detectable  
453 mucosal and systemic inflammation in contrast to our observations herein (17, 24). It is notable  
454 that HSV-2 infection increased SIV $\Delta$ Nef infection and peak viremia despite the low virulence  
455 and absence of rectal cytokine responses or T cell activation at the times examined,  
456 underscoring that factors beyond mucosal inflammation are involved in the HSV-2 mediated

457 increase in HIV/SIV susceptibility and replication. However, we did not study any other time  
458 points or examine a role for additional mucosal immune changes (e.g. HSV-specific tissue  
459 resident memory T cells) since we wanted to limit the collection of tissues.

460 PolyICLC also contributed to SIV control in SIV $\Delta$ Nef vaccinated macaques, as the  
461 frequency of controllers was higher in the HSV-2/polyICLC group than in the HSV-2 group even  
462 with the protective MHC allele-bearing macaques censored. PolyICLC and its parent molecule  
463 polyIC stimulate innate immunity, activate DCs to focus Th1 responses, and are being tested in  
464 preventative and therapeutic vaccines for HIV, other pathogens, and cancer in animal models  
465 and clinical trials (15, 19, 20, 62, 65-74). Repeated administration of polyICLC increased  
466 SIV $\Delta$ Nef take but did not increase SIV $\Delta$ Nef viremia or induce a systemic IFN I response  
467 detectable at the times tested. PolyICLC did, however, induce mucosal and systemic innate  
468 antiviral cytokine responses. We previously reported that a regimen of 2mg of polyICLC given  
469 twice 24 hours apart (with the second dose 24 hours before SIV $\Delta$ Nef) dampened take of  
470 SIV $\Delta$ Nef, increased SIV $\Delta$ Nef viremia in those vaccinated, and boosted complete protection from  
471 rectal SIV challenge (15). Differences in SIV protection outcomes by the dosing and timing of  
472 the same adjuvant highlight the delicate balance required in the mucosa for prevention of HIV  
473 transmission. Facilitation of complete protection by polyICLC may be linked with the magnitude  
474 of SIV $\Delta$ Nef viremia as we did not observe increased SIV $\Delta$ Nef viremia by polyICLC herein. In  
475 keeping with published results from murine studies showing that polyICLC inhibits HSV-2  
476 infection (63, 64), polyICLC reduced HSV-2 shedding in the macaques. Since delivering  
477 polyICLC with each HSV-2 inoculation resulted in virtually no shedding past the 24-hour time  
478 point, it is likely that polyICLC either blunted the inoculum or triggered an abortive infection with  
479 immune system activation. Mechanistic studies that can reveal how the combination of HSV-2  
480 and polyICLC uniquely focused the immune system for SIV control will be critically informative.

481 Most studies of SIV $\Delta$ Nef and other LAVs have used traditional intravenous immunization  
482 with a large vaccine inoculum (e.g.  $10^5$  TCID<sub>50</sub> SIV $\Delta$ Nef). In those studies, vaccine take was

483 universal, and protection correlated inversely with the level of vaccine attenuation and  
484 heterogeneity between the vaccine and challenge strains (6-8, 33, 34). Immunization with  $10^3$   
485 TCID<sub>50</sub> SIV $\Delta$ Nef rectally is less protective (15), providing the opportunity to investigate the role  
486 of host factors and immune responses to the same vaccine at differing levels of protection. The  
487 large cohort of macaques immunized mucosally with SIV $\Delta$ Nef and displaying varying levels of  
488 protection herein enabled the unexpected finding that in this mucosal vaccination model,  
489 SIV $\Delta$ Nef persistence – as reflected by levels of plasma viremia, SIV $\Delta$ Nef DNA in tissues, and  
490 replication competent virus in lymph nodes – is neither necessary nor sufficient for protection  
491 from SIV disease. In fact, macaques with the greatest SIV $\Delta$ Nef viremia exhibited no control  
492 whatsoever over SIVmac239 replication while macaques that controlled SIV completely after  
493 infection had no SIV $\Delta$ Nef – including DNA, RNA, and replication competent virus – in blood or  
494 tissues prior to SIV challenge. Ours is the first study of which we are aware to identify a specific  
495 SIV $\Delta$ Nef vaccinated partial protection group with complete control of SIV viremia in the absence  
496 of measurable SIV $\Delta$ Nef persistence. Although low amounts of SIV DNA were detected in the  
497 gut and lymph nodes of controller macaques at the time of euthanasia, CD4 T cell frequency  
498 and function in the gut mucosa were preserved in keeping with previous findings that completely  
499 and partially protected SIV $\Delta$ Nef vaccinated macaques do not lose their gut CD4 T cells (6). We  
500 further demonstrated that functional cytokine producing cells were preserved, especially the  
501 IL17-secreting subsets.

502         How vaccinated macaques managed to control SIV in the absence of SIV $\Delta$ Nef  
503 persistence remains mechanistically unanswered. Local immune changes, including innate  
504 responses at times we did not sample and migration or phenotypic/functional changes in  
505 specific T cell subsets as mentioned above, could have participated in the controller phenotype.  
506 Rectal HSV-2 infection did induce a systemic IFN I response, which was sustained in the  
507 polyICLC-treated animals at the times examined, and this also potentially contributed to SIV  
508 control. We explored a role for Tfh cells since previous studies identified Tfh cells in lymph

509 nodes as the major refuge for LAV replication in vaccinated macaques as well as for SIV  
510 persistence with viral transcription in elite controllers (8, 16). Tfh cell frequency herein paralleled  
511 SIV $\Delta$ Nef viremia, which is not surprising since these cells are expected to house replicating  
512 virus. Although controller macaques had a low frequency of Tfh cells (paralleling lack of  
513 SIV $\Delta$ Nef viremia), they had a heightened frequency of CXCR5<sup>high</sup> CD4 T cells in blood,  
514 suggesting a possible redistribution of immune cells between blood and tissues. A lower  
515 baseline frequency of Tfh cells could have been the cause for lower SIV $\Delta$ Nef persistence in  
516 controllers. By the same reasoning, a higher frequency of total CXCR5<sup>high</sup> CD4 T cells in blood  
517 could have resulted from lack of SIV $\Delta$ Nef replication and thus lack of cell death. However, IFN I  
518 has been shown to induce the CXCR5 ligand CXCL13 in the periphery, driving the formation of  
519 extra-lymphoid germinal centers (75). Controllers also displayed increased IFN $\alpha$  production  
520 during acute SIV infection. The enhanced IFN I production by controllers (especially in HSV-  
521 2/polyICLC treated animals) could have independently facilitated the induction of CXCR5 on  
522 blood CD4 T cells. Future studies will need to investigate further the role of these blood  
523 CXCR5<sup>high</sup> cells in SIV control.

524 Tfh frequency does not explain the differences in protection outcomes between the  
525 protected and non-controller macaques. Similar Tfh cell frequencies pre-challenge are likely  
526 related to the similar SIV $\Delta$ Nef viral loads. Importantly, we were unable to dissect which cells  
527 harbored SIV $\Delta$ Nef pre-challenge as co-cultures of LNMCs with CEMx174 cells utilized unsorted  
528 LNMC populations and the frequency of SIV $\Delta$ Nef<sup>+</sup> cells was below the level of detection in  
529 absence of co-culture. But it is possible that different cell subsets from completely protected and  
530 non-controller macaques harbored the SIV $\Delta$ Nef pre-challenge and that this contributed to the  
531 dysfunctional immune response in non-controllers. Completely protected animals and not non-  
532 controllers exhibited a blip in SIV $\Delta$ Nef viremia following SIV challenge, but we do not know  
533 which cells produced this blip or if it aided protective immunity.

534 Non-controllers segregated from completely protected macaques phenotypically by their  
535 heightened frequency in blood of CXCR3+CCR6+ CD4 T cells, a subset containing the pro-  
536 inflammatory and highly HIV-susceptible Th1Th17 cells, within total CD4 T cells and also within  
537 the CXCR5<sup>high</sup> subset of CD4 T cells. The correlation between Th1Th17 cell frequency and lack  
538 of control hints at the importance of systemic immune activation in HIV pathogenesis. Non-  
539 controllers also lacked the PD-1<sup>low</sup>CXCR5<sup>high</sup> Tfh precursors found in the protected macaques.

540 Location, maturity and functionality, especially of SIV-specific T cell responses, have  
541 emerged as cornerstones of SIV $\Delta$ Nef immunity (6, 8, 9, 44, 76, 77), and T cell function certainly  
542 was involved in the difference between completely protected and non-controller macaques.  
543 Previous studies showed the importance of lymph node T cell functionality in LAV-mediated  
544 protection in terms of the magnitude and number of cytokines secreted. Adding to this, we found  
545 that non-controllers also displayed an impaired CD8 T cell response dominated by  
546 monofunctional IFN $\gamma$  producing cells. Both non-controllers and controllers differed from the  
547 completely protected macaques by having low CD40L expression on their SIV-specific T cells,  
548 and thus low capacity to receive co-stimulatory signals. Although CD40L is prototypically  
549 considered a marker of antigen specific CD4 T cells, CD40L expression has been documented  
550 on a substantial fraction of CD8 T cells with helper cytokine secretion function (78). Our findings  
551 indicate that the ability to engage costimulatory CD40 on cognate antigen presenting cells is an  
552 additional important factor in SIV $\Delta$ Nef mediated protection that may help to differentiate  
553 completely protected macaques from those not completely protected (controllers and non-  
554 controllers). Although HIV-induced impairment in CD40L expression has been reported, it is  
555 unlikely that SIV replication drove the lack of CD40L expression so early in infection. Whether  
556 impairment in CD40L was a contributing cause of failure to be completely protected from SIV  
557 infection remains to be investigated.

558 There were limitations to our study in terms of specific immune responses and host  
559 characteristics that were beyond the scope and so not measured herein. We did not determine

560 the tetherin, APOBEC3G, or other alleles that could have promoted certain protection  
561 phenotypes. We did not study gene expression over time, but only at a single time point. We did  
562 not study antibody functions other than neutralization. And we did not examine SIV-specific T  
563 cells in the mucosa or HSV-specific T cells at all. Any of these parameters could have  
564 additionally contributed to the phenotypes we identified and should be examined in future  
565 studies. In addition, we followed animals out to only 16 weeks post SIV challenge, and the  
566 protection groupings were made based on the viral load data during this time period.  
567 Importantly, we are unable to exclude potential confounding of protective Mamu alleles as  
568 macaques possessing these alleles were included in the study. In particular, the effect of  
569 polyICLC alone on the controller phenotype cannot be evaluated as three of four polyICLC  
570 treated macaques possessed a protective allele. Nonetheless, the findings for HSV-2 persisted  
571 in the MHC censored dataset and the controller phenotype was present more in the HSV-  
572 2/polyICLC group than the HSV-2 group, indicating a role for polyICLC, and also the  
573 combination of the two agents. Moreover, most of the immunological observations were  
574 consistent between the full dataset and the MHC censored dataset. A central caveat to this work  
575 is that, despite enhancing SIV $\Delta$ Nef acquisition and initial replication, the HSV-2 infection  
576 resulting from low-dose repeated inoculation was minimally pathogenic. Hence, we could not  
577 explore how an underlying robust HSV-2 infection (as seen in humans) would influence  
578 protection by HIV vaccines. Use of the vaginal HSV-2 infection model, which leads to greater  
579 shedding even in the absence of SIV infection (22, 23, 29, 30), may be more useful and just as  
580 relevant for answering this question. A better understanding of how HSV-2 infection differs  
581 between macaques and humans may also facilitate an understanding of how to capitalize on the  
582 adjuvant properties of HSV observed in macaques and turn vaccination of HSV infected  
583 subjects to the favor of immunogenicity. Upon introduction of an HIV vaccine into the field, many  
584 adolescents and adults who undergo HIV immunization will already be infected with HSV-2,  
585 most with subclinical infection. Thus, understanding how underlying subclinical HSV-2 infection



586 will influence protection is an important step in successful HIV vaccine development that should  
587 be pursued in future studies.

588

589

## 590 **MATERIALS AND METHODS**

### 591 **Ethics statement**

592 Adult male Indian rhesus macaques (*Macaca mulatta*) that tested negative by serology and  
593 virus-specific PCR for SIV, SRV, Herpes B, and STLV-1 were selected for these studies. Animal  
594 care at Tulane National Primate Research Center (TNPRC, Covington, LA) complied with the  
595 regulations stated in the Animal Welfare Act and the Guide for the Care and Use of Laboratory  
596 Animals (79, 80). All macaque studies were approved by the Institutional Animal Care and Use  
597 Committee (IACUC) of TNPRC for macaques (OLAW Assurance #A4499-01) and complied with  
598 TNPRC animal care procedures. TNPRC receives full accreditation by the Association for  
599 Accreditation of Laboratory Animal Care (AAALAC #000594). Animals were socially housed  
600 indoors in climate-controlled conditions and were monitored twice daily by a team of  
601 veterinarians and technicians to ensure their welfare. Any abnormalities, including changes in  
602 appetite, stool, and behavior, were recorded and reported to a veterinarian. Macaques were fed  
603 commercially prepared monkey chow twice daily. Supplemental foods were provided in the form  
604 of fruit, vegetables, and foraging treats as part of the TNPRC environmental enrichment  
605 program. Water was available continuously through an automated watering system.

606 Veterinarians at the TNPRC Division of Veterinary Medicine have established  
607 procedures to minimize pain and distress through several means in accordance with the  
608 recommendations of the Weatherall Report. Prior to all procedures, including blood draws,  
609 macaques were anesthetized with ketamine-HCl (10 mg/kg) or tiletamine/zolazepam (6 mg/kg).  
610 Preemptive and post-procedural analgesia (buprenorphine 0.01 mg/kg) was administered for  
611 procedures that could cause more than momentary pain or distress in humans undergoing the



612 same procedures. Macaques were euthanized at the study conclusion 16 weeks post-  
613 SIVmac239 challenge using methods consistent with recommendations of the American  
614 Veterinary Medical Association (AVMA) Panel on Euthanasia and per the recommendations of  
615 the IACUC. Four macaques were recommended for euthanasia prior to study conclusion – 2  
616 were euthanized prior to scheduled SIV challenge (and were excluded from the study analyses)  
617 and 2 were euthanized at 12 weeks post-SIV challenge. For euthanasia, animals were  
618 anesthetized with tiletamine/zolazepam (8 mg/kg) and given buprenorphine (0.01 mg/kg)  
619 followed by an overdose of pentobarbital sodium. Death was confirmed by auscultation of the  
620 heart and pupillary dilation.

621

## 622 **Viruses and stimuli**

623 Stocks of SIVmac239 and SIVmac239 $\Delta$ Nef were grown in freshly isolated rhesus macaque  
624 PBMCs from SIV-uninfected single donors as previously described (15). The same virus stocks  
625 used in (15) were re-titered and used herein. Virus titer was determined in CEMx174 cells  
626 (ATCC, Manassass, VA) by p27 ELISA quantification (ZeptoMetrix, Buffalo, NY) and syncytia  
627 scoring after 14 days with the calculation method of Reed and Meunch. HSV-2 strain G was  
628 originally obtained from ATCC and grown and titered on Vero cells (ATCC) by plaque assay as  
629 described (81). PolyICLC (Hiltonol®) was provided by Oncovir (15, 19, 20, 65).

630

## 631 **Animal treatments and specimen collection**

632 Thirty-three macaques were initially enrolled across four treatment groups: control (PBS; n=11),  
633 HSV-2 alone (n=11), polyICLC alone (n=5), and HSV-2/polyICLC (n=6). However, two  
634 macaques (one control, one polyICLC) became ill for reasons unrelated to the assigned  
635 treatments, had to be euthanized prior to scheduled SIV challenge, and were excluded from all  
636 analyses. Treatments were administered atraumatically rectally in 1 mL volume repeated twice  
637 weekly for 10 weeks (20 treatments) according to the protocol we developed for vaginal HSV-2

638 infection (29, 30). Each HSV-2 exposure was  $10^7$  pfu; each polyICLC exposure was 1 mg; and  
639 each HSV-2/polyICLC exposure was  $10^7$  pfu + 1 mg mixed together. Seven days after the last  
640 treatment, all macaques were rectally immunized with the LAV SIV $\Delta$ Nef ( $10^3$  TCID<sub>50</sub>). Half of the  
641 animals (IK12, HE04, HV35, II42, GL42, IN72, JG09, HP57, IJ50, IN31, HR88, HG53, II29,  
642 IR67, II95, HP47) were challenged with SIV 13 weeks later and the other half (IC50, IH05,  
643 GL03, JN70, HR79, ID90, JG86, HT20, IJ04, JI44, HE49, IM98, JN27, JM05, JF96) 31 weeks  
644 later (**Fig. S1**). Challenging macaques that did not become infected with SIV $\Delta$ Nef alongside  
645 vaccinated macaques provided an internal control for SIV virulence (all unvaccinated animals  
646 became infected with SIV). The animals were followed for 16 weeks post-SIV challenge and  
647 euthanized.

648 Blood, rectal swabs, rectal biopsies, and peripheral lymph nodes (inguinal, axillary) were  
649 collected periodically during the study. At euthanasia, additional deep tissues (axillary,  
650 mesenteric, iliac lymph nodes; colorectal mucosa; jejunum; ileum) were collected. All fluids and  
651 tissues were shipped to the Population Council in New York overnight and processed  
652 immediately on arrival as previously described (15, 19). Plasmas were isolated and stored at -  
653 80°C (15). Isolated PBMCs were used immediately for flow cytometry or stored in RNA Protect  
654 (Qiagen) according to the manufacturer's instructions for RNA isolation. Rectal swabs were  
655 stored both as total uncleared and cleared (by centrifugation) aliquots at -80°C (15, 17).  
656 Mucosal tissues and lymph nodes were transported in L-15 media (HyClone Laboratories, Inc.,  
657 Logan, UT) supplemented with 10% FBS and 100 U/mL penicillin/100 µg/mL streptomycin. All  
658 tissues were washed upon arrival. Lymph nodes were manually dissociated and the LNMCs  
659 passed through 40µm cell strainers before being used for flow cytometry, or they were placed in  
660 RNALater (Qiagen) overnight at 4°C before being transferred to -20°C for storage. Mucosal  
661 tissues were digested with collagenase IV and passed through 40µm strainers to obtain cells for  
662 flow cytometry, or they were placed in RNALater and stored.

663

664 **SIV $\Delta$ Nef and SIV detection**

665 SIV $\Delta$ Nef and SIV plasma RNA viral loads in macaques were determined by discriminatory RT-  
666 qPCR in *nef* as previously described (15, 17, 32). The Quantitative Molecular Diagnostics Core,  
667 AIDS and Cancer Virus Program, Frederick National Laboratory performed the plasma Nef and  
668  $\Delta$ Nef assays. Infection was defined as two consecutive time points with plasma viremia >100  
669 copies/mL or any viremia >10<sup>3</sup> copies/mL, consistent with our previously defined criteria (15).  
670 SIV $\Delta$ Nef and SIV DNA in tissues collected at the time of euthanasia were quantified alongside  
671 albumin by qPCR in-house (17, 82, 83) using the Nef and  $\Delta$ Nef-specific primers and probes.  
672 Standard curves for the DNA qPCR assays were produced from SIV and SIV $\Delta$ Nef virus  
673 preparations. RNA was extracted from SIV and SIV $\Delta$ Nef virus stocks with the QIAamp  
674 UltraSens Virus kit (Qiagen, Germantown, MD), reverse transcribed with the Superscript VILO  
675 kit (Thermofisher, Waltham, MA), and diluted to make the standard curves. Each standard curve  
676 was checked for specificity and amplification linearity across the dilutions.

677

678 **HSV-2 detection**

679 We determined the presence of HSV-2 DNA in unclarified rectal swab samples collected over  
680 time, including following biopsy of the rectal mucosa 8 weeks post-SIV $\Delta$ Nef and 8 weeks post-  
681 SIV. The biopsy provides a stressor to encourage HSV-2 reactivation and mucosal replication,  
682 thereby increasing mucosal shedding. Swabs were subjected to nested PCR with 6 reactions  
683 per sample, as in previous studies (17, 22, 24, 29, 30, 82, 83). The identity of the amplicons was  
684 confirmed by sequencing (Genewiz, South Plainfield, NJ).

685

686 **Soluble factors**

687 Soluble factors in rectal swabs and plasma were quantified using the monkey Novex Multiplex  
688 Luminex assay (Cytokine Monkey Magnetic 29-Plex Panel; Invitrogen, Waltham, MA) on a  
689 MAGPIX1 System (Luminex Corporation, Austin, TX). The kit included the following analytes:

690 IL-1RA, GM-CSF, G-CSF, MDC, MIF, I-TAC, FGF-Basic, EGF, HGF, VEGF, Eotaxin, TNF $\alpha$ ,  
691 IFN $\gamma$ , IL-1 $\beta$ , IL-2, IL-4, IL-5, IL-6, IL-10, IL-12, IL-15, IL-17, CXCL8, CXCL9, CXCL10, CCL2,  
692 CCL3, CCL4 and CCL5. Factors with detectable levels above the lowest standard curve  
693 concentration were analyzed.

694

## 695 **Gene expression**

696 Gene expression studies were performed with modifications to our previously published  
697 approach (15, 84). RNA was isolated from frozen PBMC dry pellets using the RNeasy mini kit  
698 (Qiagen) according to the manufacturer's instructions with Qiashtredder columns (Qiagen) for  
699 cell disruption. Total RNA was subjected to on-column DNA digestion with RNase-free DNase  
700 (Qiagen) and post-isolation DNA digestion using DNA-free DNase Treatment and Removal  
701 System from Ambion (Austin, TX) according to the manufacturer's instructions. RNA was  
702 quantified on a Nanodrop 1000 spectrophotometer (Thermo Scientific, Wilmington, DE).  
703 Expression of macaque IRF3, IRF7, TRIM5 $\alpha$ , and IFI16 vs. GAPDH was analyzed by one-step  
704 SYBR Green RT-qPCR (Kapa Biosystems, Wilmington, MA) according to the manufacturer's  
705 instructions. Expression of IFN $\alpha$  vs. GAPDH was analyzed by two-step SYBR Green RT-qPCR  
706 (Kapa) as follows: cDNA was synthesized with the Superscript VILO cDNA synthesis kit, and  
707 Kapa SYBR Green RT-qPCR was performed. For all genes, primer concentrations were  
708 determined empirically and efficiency was determined prior to testing mRNA expression in  
709 samples. Data were analyzed by the  $\Delta\Delta C_t$  method. The cell control was GAPDH. The  
710 comparison control was sample from a single donor (same for all comparisons). The fold  
711 difference ( $2^{-\Delta\Delta C_t}$ ) is reported. Primer sequences are as follows. IRF3: F- 5'  
712 CGCAGCCTCGAGTTTGAGAG 3', R- 5' ATGGTCCGGCCTACGATAGAA 3'; IRF7: F- 5'  
713 ATGGGCAAGTGCAAGGTGTA 3', R- 5' ACCAGCTCTTGAAGAAGACTC 3'; TRIM5 $\alpha$ : F- 5'  
714 GTGTGCCGGATCAGTTACCA 3', R- 5' GTCCCTCTTCTGGGCTCAAC 3'; IFI16: F- 5'  
715 GAAGGCTGGAACGAAAGGGA 3'; R- 5' GAAGGCTGGAACGAAAGGGA 3'; IFN $\alpha$ : F- 5'

716 AGCCTGTGTGATGCAGGAGATG 3', R- 5' GGAAGTATTTCTCACGGCCAG 3'; GAPDH: F-  
717 5' GCTGAGTACGTCGTGGAGTC 3', R- 5' GCGTTGCTGACGATCTTG 3'.

718

### 719 **Surface flow cytometry**

720 Isolated rectal cells, PBMCs, and LNMCs were subjected to surface staining and flow cytometry  
721 as previously described (15, 83). Briefly, cells were incubated with the viability dye LIVE/DEAD  
722 Aqua (eBioscience), washed, and incubated with various antibody cocktails. Labeled cells were  
723 washed and fixed in 1% paraformaldehyde (PFA). All antibodies were purchased from Becton  
724 Dickenson (BD, Franklin Lakes, NJ) unless otherwise noted. Clone information is provided in  
725 parentheses for each antibody. Fluorescence minus one (FMO) controls were used throughout  
726 for gating. Data were acquired immediately after staining on an LSRII (BD) and analyzed with  
727 FlowJo software version 9.

728 Rectal cells were labeled with: CD3-AlexaFluor700 (SP34-2), CD4-V450 (L200), CD95-  
729 FITC (DX2),  $\alpha$ 4 $\beta$ 7-APC (Non-human Primate Reagent Resource), CD69-APCH7 (FN50),  
730 CCR7-BV605 (Biolegend, San Diego, CA), CCR5-PE-Cy7 (NIH AIDS Reagent Program,  
731 labeled in-house), CCR6-PE (11-A9), and CD8-BUV395 (RPA-T8).

732 LNMCs and PBMCs were labeled with: CD3-APC-Cy7 (SP34-2), CD4-BUV395 (L200),  
733 CD200-BB515 (MRC OX-104), CD95-PE-Cy7 (DX2), CD127-BB700 (HIL-7R-M21), PD-1-PE-  
734 CF594 (EH12.1), CCR6-APC-R700 (11A9), CXCR3-BV605 (1C6), CD25-BV421 (M-A251), and  
735 CXCR5-PE (NHP, obtained from the Non-human Primate Reagent Resource).

736

### 737 **Intracellular cytokine flow cytometry**

738 The frequencies of all cytokine-secreting T cells were monitored in jejunum. Isolated jejunum  
739 cells were stimulated with PMA (20 ng/mL)/ionomycin (0.5  $\mu$ g/mL) vs. media for 1 hour at 37°C  
740 and then an additional 4 hours with Brefeldin A (10  $\mu$ g/mL) and GolgiStop (BD) according to the  
741 manufacturer's instructions. Stimulated cells were washed in Brilliant Staining Buffer (BD),

742 stained with fixable viability stain (FVS)-575V (BD), and labeled with antibodies to surface  
743 markers (clones information is provided only if not provided above): CD3-APC-Cy7, CD4-  
744 BUV395, CD8-BUV496 (RPA-T8), and CD69-PerCP-Cy5.5 (FN50). Surface-labeled cells were  
745 then fixed in PFA overnight, permeabilized in BD Perm Wash Buffer, and labeled with  
746 antibodies to intracellular markers IFN $\gamma$ -PE-Cy7 (4S.B3), IL17A-BV421 (N49-653), and IL22-  
747 APC (IL22JOP, eBioscience, San Diego, CA). Fully labeled cells were washed and the data  
748 were acquired immediately on an LSRII and analyzed with FlowJo software.

749 The frequencies of SIV-specific T cells were monitored in inguinal lymph nodes. Isolated  
750 LNMCs were incubated with SIV peptide pools covering gag and env in the presence of co-  
751 stimulatory  $\alpha$ CD28 and  $\alpha$ CD49d (BD, 10  $\mu$ g/mL) on goat- $\alpha$ -mouse IgG F(ab)<sub>2</sub>-coated (KPL,  
752 Gaithersburg, MD) plates. Brefeldin A and GolgiStop were added after 1 hour and the cells  
753 stimulated for a further 5 hours. Stimulated cells were washed and stained with FVS-575V as  
754 above followed by surface staining, permeabilization, intracellular staining, and data acquisition  
755 and analysis as described above. Antibodies were the following: CD3-APC-Cy7, CD4-BUV395,  
756 CD8-BUV496, CD95-APC (DX2), CD69-PerCP-Cy5.5, CD40L-PE (TRAP1), TNF $\alpha$ -PE-CF594  
757 (MAb11), IL2-APCR700 (MQ1-17H12), and IFN $\gamma$ -PE-Cy7 (4S.B3).

758

### 759 **Co-cultures to detect replication competent SIV**

760  $5 \times 10^4$  LNMCs were co-cultured with  $10^5$  CEMx174 cells for 21 days. Culture media was  
761 exchanged every 3 days, and cultures were checked for signs of syncytia. On day 21,  
762 supernatants were collected for SIV p27 ELISA per the manufacturer's instructions, and cells  
763 were collected for flow cytometry. The cells were stained for viability with Live/Dead Aqua stain,  
764 then labeled with antibody to CD4 (CD4-PE, L200), fixed and permeabilized with BD Fix/Perm,  
765 washed in BD Perm Wash, and incubated with Alexa647-conjugated antibody to SIV p27 (55-  
766 F12, provided by Mr. Trubey, NCI Frederick). Labeled cells were washed and the data acquired  
767 immediately on the LSRII and analyzed with FlowJo software.

768

769 **SIV env-specific antibody detection**

770 Binding antibodies were detected by ELISA as follows. Heat-inactivated plasmas from baseline  
771 and the day of SIV challenge were incubated for 1 hour at 37°C on plates that had been coated  
772 with SIVmacA11 gp140 (NIH AIDS Reagent Program [ARP] Cat#2209 Lot16) in sodium  
773 bicarbonate buffer pH 9.6 overnight at 4°C and blocked 1 hour at 22°C in 2% bovine serum  
774 albumin (BSA)/PBS. Plates were washed in 1x ELISA plate wash (PerkinElmer, Waltham, MA)  
775 and anti-rhesus IgG-horseradish peroxidase (Non Human Primate Repository) was added for 1  
776 hour at 37°C. Upon washing, the substrate was added for 0.5 hours at 22°C. The reaction was  
777 stopped with 1N hydrochloric acid and the optical density (OD) was read on an Emax Precision  
778 microplate reader with Softmax Pro software (Molecular Devices, San Jose, CA). Groups were  
779 compared at a plasma dilution of 1:2560.

780 Neutralizing antibodies were measured against lab-adapted SIVmac251. A stock of  
781 SIVmac251 was grown from stock obtained from the NIH ARP (Catalog #253) according to the  
782 protocol from the NIH ARP. Heat-inactivated plasmas from baseline and day of SIV challenge  
783 vs media were incubated with 50 TCID<sub>50</sub> SIVmac251 in the presence of polybrene (4 µg/mL) on  
784 5% BSA-coated plates for 1 hour at 37°C. Plasma/virus mixtures were then collected and added  
785 to 3 x 10<sup>5</sup> CEMx174 cells for 7 days. On days 3 and 5 of culture, cells were fed with additional  
786 plasma or media. Sybr Green SIV RT-qPCR (Kapa) was used to measure SIV growth in the  
787 cultures, and SIV quantities in culture supernatant were determined by standard curve method.  
788 Percent neutralization was considered to be the SIV copy number in the presence of immune  
789 plasma subtracted from the SIV copy number in the presence of baseline plasma divided by the  
790 SIV copy number in the presence of baseline plasma.

791

792 **Statistics**



793 Unless otherwise specified, the data were analyzed using the Kruskal Wallis test for unpaired  
794 samples with Dunns multiple comparison correction post-test. Significance level  $\alpha$  was 0.05  
795 throughout, but in order to identify trends, Wilcoxon Signed Rank test was performed for  
796 datasets with a Kruskal Wallis  $P < 0.10$ , and all Kruskal Wallis  $P$  values less than 0.10 are  
797 shown. Everywhere multiple comparison correction was used, all comparisons were made  
798 except as noted in the figure legend. Mann Whitney test was used for binary comparisons (e.g.  
799 the effect of polyICLC on HSV-2 shedding). Spearman correlation coefficient was calculated to  
800 identify correlations between parameters (e.g. Tfh frequency and SIV $\Delta$ Nef plasma viral load).  
801 SIV $\Delta$ Nef take and SIV infection in macaques by treatment group was evaluated with two-sided  
802 Fisher's exact test (control vs. treatment), and Chi Square test for trend (comparison of all  
803 groups).

804

805

## 806 **ACKNOWLEDGEMENTS**

807 We would like to express our sincere thanks to Mr. Mac Trubey (AIDS and Cancer Virus  
808 Program, Frederick National Laboratory) for providing the SIV p27 antibody and staining  
809 method, and to Dr. Brandon Keele (AIDS and Cancer Virus Program, Frederick National  
810 Laboratory) for sequencing the *nef* gene of the plasma SIV in macaques with outlying viral loads  
811 to confirm the identity of the circulating virus. At the Population Council, we thank Drs. Elena  
812 Martinelli and Natalia Teleshova for helpful discussions and critical reading of the manuscript,  
813 Ms. Marlena Plagianos for discussions on statistical analysis, and Ms. Shimin Zhang for LSRII  
814 maintenance.

815

816

## 817 **REFERENCES**



- 818 1. Kozlowski PA, Aldovini A. Mucosal Vaccine Approaches for Prevention of HIV and SIV  
819 Transmission. *Curr Immunol Rev.* 2019;15(1):102-22.
- 820 2. Gray G, Buchbinder S, Duerr A. Overview of STEP and Phambili trial results: two phase  
821 IIb test-of-concept studies investigating the efficacy of MRK adenovirus type 5 gag/pol/nef  
822 subtype B HIV vaccine. *Curr Opin HIV AIDS.* 2010;5(5):357-61.
- 823 3. Hammer SM, Sobieszczyk ME, Janes H, Karuna ST, Mulligan MJ, Grove D, et al.  
824 Efficacy trial of a DNA/rAd5 HIV-1 preventive vaccine. *N Engl J Med.* 2013;369(22):2083-92.
- 825 4. Bukh I, Calcedo R, Roy S, Carnathan DG, Grant R, Qin Q, et al. Increased mucosal  
826 CD4+ T cell activation in rhesus macaques following vaccination with an adenoviral vector. *J*  
827 *Viro.* 2014;88(15):8468-78.
- 828 5. Qureshi H, Ma ZM, Huang Y, Hodge G, Thomas MA, DiPasquale J, et al. Low-dose  
829 penile SIVmac251 exposure of rhesus macaques infected with adenovirus type 5 (Ad5) and  
830 then immunized with a replication-defective Ad5-based SIV gag/pol/nef vaccine recapitulates  
831 the results of the phase IIb step trial of a similar HIV-1 vaccine. *J Virol.* 2012;86(4):2239-50.
- 832 6. Adnan S, Reeves RK, Gillis J, Wong FE, Yu Y, Camp JV, et al. Persistent Low-Level  
833 Replication of SIVDeltanef Drives Maturation of Antibody and CD8 T Cell Responses to Induce  
834 Protective Immunity against Vaginal SIV Infection. *PLoS pathogens.* 2016;12(12):e1006104.
- 835 7. Alpert MD, Harvey JD, Lauer WA, Reeves RK, Piatak M, Jr., Carville A, et al. ADCC  
836 develops over time during persistent infection with live-attenuated SIV and is associated with  
837 complete protection against SIV(mac)251 challenge. *PLoS pathogens.* 2012;8(8):e1002890.
- 838 8. Fukazawa Y, Park H, Cameron MJ, Lefebvre F, Lum R, Coombes N, et al. Lymph node  
839 T cell responses predict the efficacy of live attenuated SIV vaccines. *Nat Med.*  
840 2012;18(11):1673-81.
- 841 9. Li Q, Zeng M, Duan L, Voss JE, Smith AJ, Pambuccian S, et al. Live simian  
842 immunodeficiency virus vaccine correlate of protection: local antibody production and  
843 concentration on the path of virus entry. *J Immunol.* 2014;193(6):3113-25.

- 844 10. Connor RI, Montefiori DC, Binley JM, Moore JP, Bonhoeffer S, Gettie A, et al. Temporal  
845 analyses of virus replication, immune responses, and efficacy in rhesus macaques immunized  
846 with a live, attenuated simian immunodeficiency virus vaccine. *J Virol.* 1998;72(9):7501-9.
- 847 11. Daniel MD, Kirchhoff F, Czajak SC, Sehgal PK, Desrosiers RC. Protective effects of a  
848 live attenuated SIV vaccine with a deletion in the nef gene. *Science.* 1992;258(5090):1938-41.
- 849 12. Reynolds MR, Weiler AM, Piaskowski SM, Kolar HL, Hessel AJ, Weiker M, et al.  
850 Macaques vaccinated with simian immunodeficiency virus SIVmac239Delta nef delay  
851 acquisition and control replication after repeated low-dose heterologous SIV challenge. *J Virol.*  
852 2010;84(18):9190-9.
- 853 13. Reynolds MR, Weiler AM, Weisgrau KL, Piaskowski SM, Furlott JR, Weinfurter JT, et al.  
854 Macaques vaccinated with live-attenuated SIV control replication of heterologous virus. *The*  
855 *Journal of experimental medicine.* 2008;205(11):2537-50.
- 856 14. Tenner-Racz K, Stahl Hennig C, Uberla K, Stoiber H, Ignatius R, Heeney J, et al. Early  
857 protection against pathogenic virus infection at a mucosal challenge site after vaccination with  
858 attenuated simian immunodeficiency virus. *Proc Natl Acad Sci U S A.* 2004;101(9):3017-22.
- 859 15. Aravantinou M, Frank I, Hallor M, Singer R, Tharinger H, Kenney J, et al. PolyICLC  
860 Exerts Pro- and Anti-HIV Effects on the DC-T Cell Milieu In Vitro and In Vivo. *PloS one.*  
861 2016;11(9):e0161730.
- 862 16. Fukazawa Y, Lum R, Okoye AA, Park H, Matsuda K, Bae JY, et al. B cell follicle  
863 sanctuary permits persistent productive simian immunodeficiency virus infection in elite  
864 controllers. *Nat Med.* 2015;21(2):132-9.
- 865 17. Guerra-Perez N, Aravantinou M, Veglia F, Goode D, Truong R, Derby N, et al. Rectal  
866 HSV-2 Infection May Increase Rectal SIV Acquisition Even in the Context of SIVDeltanef  
867 Vaccination. *PloS one.* 2016;11(2):e0149491.

- 868 18. Trapp S, Derby NR, Singer R, Shaw A, Williams VG, Turville SG, et al. Double-stranded  
869 RNA analog poly(I:C) inhibits human immunodeficiency virus amplification in dendritic cells via  
870 type I interferon-mediated activation of APOBEC3G. *J Virol.* 2009;83(2):884-95.
- 871 19. Jasny E, Geer S, Frank I, Vagenas P, Aravantinou M, Salazar AM, et al.  
872 Characterization of peripheral and mucosal immune responses in rhesus macaques on long-  
873 term tenofovir and emtricitabine combination antiretroviral therapy. *J Acquir Immune Defic*  
874 *Syndr.* 2012;61(4):425-35.
- 875 20. Vagenas P, Aravantinou M, Williams VG, Jasny E, Piatak M, Jr., Lifson JD, et al. A  
876 tonsillar PolyI:CLC/AT-2 SIV therapeutic vaccine maintains low viremia following antiretroviral  
877 therapy cessation. *PloS one.* 2010;5(9):e12891.
- 878 21. Looker KJ, Elmes JAR, Gottlieb SL, Schiffer JT, Vickerman P, Turner KME, et al. Effect  
879 of HSV-2 infection on subsequent HIV acquisition: an updated systematic review and meta-  
880 analysis. *Lancet Infect Dis.* 2017;17(12):1303-16.
- 881 22. Crostarosa F, Aravantinou M, Akpogheneta OJ, Jasny E, Shaw A, Kenney J, et al. A  
882 macaque model to study vaginal HSV-2/immunodeficiency virus co-infection and the impact of  
883 HSV-2 on microbicide efficacy. *PloS one.* 2009;4(11):e8060.
- 884 23. Goode D, Truong R, Villegas G, Calenda G, Guerra-Perez N, Piatak M, et al. HSV-2-  
885 driven increase in the expression of alpha4beta7 correlates with increased susceptibility to  
886 vaginal SHIV(SF162P3) infection. *PLoS pathogens.* 2014;10(12):e1004567.
- 887 24. Martinelli E, Tharinger H, Frank I, Arthos J, Piatak M, Jr., Lifson JD, et al. HSV-2  
888 infection of dendritic cells amplifies a highly susceptible HIV-1 cell target. *PLoS pathogens.*  
889 2011;7(6):e1002109.
- 890 25. Zhu J, Hladik F, Woodward A, Klock A, Peng T, Johnston C, et al. Persistence of HIV-1  
891 receptor-positive cells after HSV-2 reactivation is a potential mechanism for increased HIV-1  
892 acquisition. *Nat Med.* 2009;15(8):886-92.

- 893 26. Marsden V, Donaghy H, Bertram KM, Harman AN, Nasr N, Keoshkerian E, et al. Herpes  
894 simplex virus type 2-infected dendritic cells produce TNF-alpha, which enhances CCR5  
895 expression and stimulates HIV production from adjacent infected cells. *J Immunol.*  
896 2015;194(9):4438-45.
- 897 27. Rollenhagen C, Lathrop MJ, Macura SL, Doncel GF, Asin SN. Herpes simplex virus  
898 type-2 stimulates HIV-1 replication in cervical tissues: implications for HIV-1 transmission and  
899 efficacy of anti-HIV-1 microbicides. *Mucosal Immunol.* 2014;7(5):1165-74.
- 900 28. Shannon B, Yi TJ, Thomas-Pavanel J, Chieza L, Janakiram P, Saunders M, et al. Impact  
901 of asymptomatic herpes simplex virus type 2 infection on mucosal homing and immune cell  
902 subsets in the blood and female genital tract. *J Immunol.* 2014;192(11):5074-82.
- 903 29. Derby N, Aravantinou M, Kenney J, Ugaonkar SR, Wesenberg A, Wilk J, et al. An  
904 intravaginal ring that releases three antiviral agents and a contraceptive blocks SHIV-RT  
905 infection, reduces HSV-2 shedding, and suppresses hormonal cycling in rhesus macaques.  
906 *Drug Deliv Transl Res.* 2017.
- 907 30. Kenney J, Derby N, Aravantinou M, Kleinbeck K, Frank I, Gettie A, et al. Short  
908 communication: a repeated simian human immunodeficiency virus reverse transcriptase/herpes  
909 simplex virus type 2 cochallenge macaque model for the evaluation of microbicides. *AIDS*  
910 *research and human retroviruses.* 2014;30(11):1117-24.
- 911 31. Lo M, Zhu J, Hansen SG, Carroll T, Farr Zuend C, Noel-Romas L, et al. Acute Infection  
912 and Subsequent Subclinical Reactivation of Herpes Simplex Virus 2 after Vaginal Inoculation of  
913 Rhesus Macaques. *J Virol.* 2019;93(2).
- 914 32. Salisch NC, Kaufmann DE, Awad AS, Reeves RK, Tighe DP, Li Y, et al. Inhibitory TCR  
915 coreceptor PD-1 is a sensitive indicator of low-level replication of SIV and HIV-1. *J Immunol.*  
916 2010;184(1):476-87.

- 917 33. Wyand MS, Manson K, Montefiori DC, Lifson JD, Johnson RP, Desrosiers RC.  
918 Protection by live, attenuated simian immunodeficiency virus against heterologous challenge. *J*  
919 *Virology*. 1999;73(10):8356-63.
- 920 34. Wyand MS, Manson KH, Garcia-Moll M, Montefiori D, Desrosiers RC. Vaccine protection  
921 by a triple deletion mutant of simian immunodeficiency virus. *J Virology*. 1996;70(6):3724-33.
- 922 35. Manrique J, Piatak M, Lauer W, Johnson W, Mansfield K, Lifson J, et al. Influence of  
923 mismatch of Env sequences on vaccine protection by live attenuated simian immunodeficiency  
924 virus. *J Virology*. 2013;87(13):7246-54.
- 925 36. Honda K, Yanai H, Negishi H, Asagiri M, Sato M, Mizutani T, et al. IRF-7 is the master  
926 regulator of type-I interferon-dependent immune responses. *Nature*. 2005;434(7034):772-7.
- 927 37. Honda K, Taniguchi T. IRFs: master regulators of signalling by Toll-like receptors and  
928 cytosolic pattern-recognition receptors. *Nat Rev Immunol*. 2006;6(9):644-58.
- 929 38. Murphy AA, Rosato PC, Parker ZM, Khalenkov A, Leib DA. Synergistic control of herpes  
930 simplex virus pathogenesis by IRF-3, and IRF-7 revealed through non-invasive bioluminescence  
931 imaging. *Virology*. 2013;444(1-2):71-9.
- 932 39. Monroe KM, Yang Z, Johnson JR, Geng X, Doitsh G, Krogan NJ, et al. IFI16 DNA  
933 sensor is required for death of lymphoid CD4 T cells abortively infected with HIV. *Science*.  
934 2014;343(6169):428-32.
- 935 40. Stremlau M, Owens CM, Perron MJ, Kiessling M, Autissier P, Sodroski J. The  
936 cytoplasmic body component TRIM5alpha restricts HIV-1 infection in Old World monkeys.  
937 *Nature*. 2004;427(6977):848-53.
- 938 41. Reszka N, Zhou C, Song B, Sodroski JG, Knipe DM. Simian TRIM5alpha proteins  
939 reduce replication of herpes simplex virus. *Virology*. 2010;398(2):243-50.
- 940 42. Orzalli MH, DeLuca NA, Knipe DM. Nuclear IFI16 induction of IRF-3 signaling during  
941 herpesviral infection and degradation of IFI16 by the viral ICP0 protein. *Proc Natl Acad Sci U S*  
942 *A*. 2012;109(44):E3008-17.

- 943 43. Unterholzner L, Keating SE, Baran M, Horan KA, Jensen SB, Sharma S, et al. IFI16 is  
944 an innate immune sensor for intracellular DNA. *Nat Immunol.* 2010;11(11):997-1004.
- 945 44. Adnan S, Colantonio AD, Yu Y, Gillis J, Wong FE, Becker EA, et al. CD8 T cell response  
946 maturation defined by anentropic specificity and repertoire depth correlates with SIVDelta-  
947 induced protection. *PLoS pathogens.* 2015;11(2):e1004633.
- 948 45. Martin-Gayo E, Cronin J, Hickman T, Ouyang Z, Lindqvist M, Kolb KE, et al. Circulating  
949 CXCR5(+)CXCR3(+)PD-1(lo) Tfh-like cells in HIV-1 controllers with neutralizing antibody  
950 breadth. *JCI Insight.* 2017;2(2):e89574.
- 951 46. Cunningham AL, Donaghy H, Harman AN, Kim M, Turville SG. Manipulation of dendritic  
952 cell function by viruses. *Curr Opin Microbiol.* 2010;13(4):524-9.
- 953 47. Jones CA, Fernandez M, Herc K, Bosnjak L, Miranda-Saksena M, Boadle RA, et al.  
954 Herpes simplex virus type 2 induces rapid cell death and functional impairment of murine  
955 dendritic cells in vitro. *J Virol.* 2003;77(20):11139-49.
- 956 48. Kruse M, Rosorius O, Kratzer F, Stelz G, Kuhnt C, Schuler G, et al. Mature dendritic  
957 cells infected with herpes simplex virus type 1 exhibit inhibited T-cell stimulatory capacity. *J*  
958 *Virol.* 2000;74(15):7127-36.
- 959 49. Mikloska Z, Bosnjak L, Cunningham AL. Immature monocyte-derived dendritic cells are  
960 productively infected with herpes simplex virus type 1. *J Virol.* 2001;75(13):5958-64.
- 961 50. Peretti S, Shaw A, Blanchard J, Bohm R, Morrow G, Lifson JD, et al. Immunomodulatory  
962 effects of HSV-2 infection on immature macaque dendritic cells modify innate and adaptive  
963 responses. *Blood.* 2005;106(4):1305-13.
- 964 51. Pollara G, Jones M, Handley ME, Rajpopat M, Kwan A, Coffin RS, et al. Herpes simplex  
965 virus type-1-induced activation of myeloid dendritic cells: the roles of virus cell interaction and  
966 paracrine type I IFN secretion. *J Immunol.* 2004;173(6):4108-19.
- 967 52. Salio M, Cella M, Suter M, Lanzavecchia A. Inhibition of dendritic cell maturation by  
968 herpes simplex virus. *European journal of immunology.* 1999;29(10):3245-53.

- 969 53. Sandler NG, Bosinger SE, Estes JD, Zhu RT, Tharp GK, Boritz E, et al. Type I interferon  
970 responses in rhesus macaques prevent SIV infection and slow disease progression. *Nature*.  
971 2014;511(7511):601-5.
- 972 54. Abel K, Alegria-Hartman MJ, Rothausler K, Marthas M, Miller CJ. The relationship  
973 between simian immunodeficiency virus RNA levels and the mRNA levels of alpha/beta  
974 interferons (IFN-alpha/beta) and IFN-alpha/beta-inducible Mx in lymphoid tissues of rhesus  
975 macaques during acute and chronic infection. *J Virol*. 2002;76(16):8433-45.
- 976 55. Fernandez S, Tanaskovic S, Helbig K, Rajasuriar R, Kramski M, Murray JM, et al. CD4+  
977 T-cell deficiency in HIV patients responding to antiretroviral therapy is associated with increased  
978 expression of interferon-stimulated genes in CD4+ T cells. *The Journal of infectious diseases*.  
979 2011;204(12):1927-35.
- 980 56. Fraietta JA, Mueller YM, Yang G, Boesteanu AC, Gracias DT, Do DH, et al. Type I  
981 interferon upregulates Bak and contributes to T cell loss during human immunodeficiency virus  
982 (HIV) infection. *PLoS pathogens*. 2013;9(10):e1003658.
- 983 57. Haas DW, Lavelle J, Nadler JP, Greenberg SB, Frame P, Mustafa N, et al. A  
984 randomized trial of interferon alpha therapy for HIV type 1 infection. *AIDS research and human  
985 retroviruses*. 2000;16(3):183-90.
- 986 58. Levin D, Schneider WM, Hoffmann HH, Yarden G, Busetto AG, Manor O, et al.  
987 Multifaceted activities of type I interferon are revealed by a receptor antagonist. *Sci Signal*.  
988 2014;7(327):ra50.
- 989 59. Li Q, Estes JD, Schlievert PM, Duan L, Brosnahan AJ, Southern PJ, et al. Glycerol  
990 monolaurate prevents mucosal SIV transmission. *Nature*. 2009;458(7241):1034-8.
- 991 60. Stacey AR, Norris PJ, Qin L, Haygreen EA, Taylor E, Heitman J, et al. Induction of a  
992 striking systemic cytokine cascade prior to peak viremia in acute human immunodeficiency virus  
993 type 1 infection, in contrast to more modest and delayed responses in acute hepatitis B and C  
994 virus infections. *J Virol*. 2009;83(8):3719-33.



- 995 61. Derby N, Martinelli E, Robbiani M. Myeloid dendritic cells in HIV-1 infection. *Curr Opin*  
996 *HIV AIDS*. 2011;6(5):379-84.
- 997 62. Martins KA, Bavari S, Salazar AM. Vaccine adjuvant uses of poly-IC and derivatives.  
998 *Expert review of vaccines*. 2015;14(3):447-59.
- 999 63. Zhou L, Li JL, Zhou Y, Liu JB, Zhuang K, Gao JF, et al. Induction of interferon-lambda  
1000 contributes to TLR3 and RIG-I activation-mediated inhibition of herpes simplex virus type 2  
1001 replication in human cervical epithelial cells. *Mol Hum Reprod*. 2015;21(12):917-29.
- 1002 64. Ashkar AA, Yao XD, Gill N, Sajic D, Patrick AJ, Rosenthal KL. Toll-like receptor (TLR)-3,  
1003 but not TLR4, agonist protects against genital herpes infection in the absence of inflammation  
1004 seen with CpG DNA. *The Journal of infectious diseases*. 2004;190(10):1841-9.
- 1005 65. Vagenas P, Williams VG, Piatak M, Jr., Bess JW, Jr., Lifson JD, Blanchard JL, et al.  
1006 Tonsillar application of AT-2 SIV affords partial protection against rectal challenge with  
1007 SIVmac239. *J Acquir Immune Defic Syndr*. 2009;52(4):433-42.
- 1008 66. Morse MA, Chapman R, Powderly J, Blackwell K, Keler T, Green J, et al. Phase I study  
1009 utilizing a novel antigen-presenting cell-targeted vaccine with Toll-like receptor stimulation to  
1010 induce immunity to self-antigens in cancer patients. *Clinical cancer research : an official journal*  
1011 *of the American Association for Cancer Research*. 2011;17(14):4844-53.
- 1012 67. Hartman LL, Crawford JR, Makale MT, Milburn M, Joshi S, Salazar AM, et al. Pediatric  
1013 phase II trials of poly-ICLC in the management of newly diagnosed and recurrent brain tumors.  
1014 *Journal of pediatric hematology/oncology*. 2014;36(6):451-7.
- 1015 68. Okada H, Kalinski P, Ueda R, Hoji A, Kohanbash G, Donegan TE, et al. Induction of  
1016 CD8+ T-cell responses against novel glioma-associated antigen peptides and clinical activity by  
1017 vaccinations with  $\alpha$ -type 1 polarized dendritic cells and polyinosinic-polycytidylic acid  
1018 stabilized by lysine and carboxymethylcellulose in patients with recurrent malignant glioma.  
1019 *Journal of clinical oncology : official journal of the American Society of Clinical Oncology*.  
1020 2011;29(3):330-6.



- 1021 69. Caskey M, Lefebvre F, Filali-Mouhim A, Cameron MJ, Goulet JP, Haddad EK, et al.  
1022 Synthetic double-stranded RNA induces innate immune responses similar to a live viral vaccine  
1023 in humans. *The Journal of experimental medicine*. 2011;208(12):2357-66.
- 1024 70. Longhi MP, Trumfheller C, Idoyaga J, Caskey M, Matos I, Kluger C, et al. Dendritic  
1025 cells require a systemic type I interferon response to mature and induce CD4+ Th1 immunity  
1026 with poly IC as adjuvant. *The Journal of experimental medicine*. 2009;206(7):1589-602.
- 1027 71. Park H, Adamson L, Ha T, Mullen K, Hagen SI, Nogueron A, et al. Polyinosinic-  
1028 polycytidylic acid is the most effective TLR adjuvant for SIV Gag protein-induced T cell  
1029 responses in nonhuman primates. *J Immunol*. 2013;190(8):4103-15.
- 1030 72. Stahl-Hennig C, Eisenblatter M, Jasny E, Rzehak T, Tenner-Racz K, Trumfheller C, et  
1031 al. Synthetic double-stranded RNAs are adjuvants for the induction of T helper 1 and humoral  
1032 immune responses to human papillomavirus in rhesus macaques. *PLoS pathogens*.  
1033 2009;5(4):e1000373.
- 1034 73. Thompson EA, Liang F, Lindgren G, Sandgren KJ, Quinn KM, Darrah PA, et al. Human  
1035 Anti-CD40 Antibody and Poly IC:LC Adjuvant Combination Induces Potent T Cell Responses in  
1036 the Lung of Nonhuman Primates. *J Immunol*. 2015;195(3):1015-24.
- 1037 74. Saxena M, Sabado RL, La Mar M, Mohri H, Salazar AM, Dong H, et al. Poly-ICLC, a  
1038 TLR3 Agonist, Induces Transient Innate Immune Responses in Patients With Treated HIV-  
1039 Infection: A Randomized Double-Blinded Placebo Controlled Trial. *Front Immunol*. 2019;10:725.
- 1040 75. Denton AE, Innocentin S, Carr EJ, Bradford BM, Lafouresse F, Mabbott NA, et al. Type I  
1041 interferon induces CXCL13 to support ectopic germinal center formation. *The Journal of*  
1042 *experimental medicine*. 2019;216(3):621-37.
- 1043 76. Billingsley JM, Rajakumar PA, Connole MA, Salisch NC, Adnan S, Kuzmichev YV, et al.  
1044 Characterization of CD8+ T cell differentiation following SIVDelta nef vaccination by transcription  
1045 factor expression profiling. *PLoS pathogens*. 2015;11(3):e1004740.

- 1046 77. Genesca M, Skinner PJ, Bost KM, Lu D, Wang Y, Rourke TL, et al. Protective  
1047 attenuated lentivirus immunization induces SIV-specific T cells in the genital tract of rhesus  
1048 monkeys. *Mucosal Immunol.* 2008;1(3):219-28.
- 1049 78. Frentsch M, Stark R, Matzmohr N, Meier S, Durlanik S, Schulz AR, et al. CD40L  
1050 expression permits CD8+ T cells to execute immunologic helper functions. *Blood.*  
1051 2013;122(3):405-12.
- 1052 79. Animal Welfare Act and Regulation of 2001. In: Code of Federal Regulations t, chapter  
1053 1, subchapter A: animals and animal products, editor. Beltsville, MD: U.S. Department of  
1054 Agriculture; 2001.
- 1055 80. Guide for the Care and Use of Laboratory Animals: Eighth Edition: The National  
1056 Academies Press; 2011.
- 1057 81. Aurelian. Herpes Simplex Virus. 2nd ed. New York, NY: Elsevier Science Publishers;  
1058 1992.
- 1059 82. Aravantinou M, Frank I, Arrode-Bruses G, Szpara M, Grasperge B, Blanchard J, et al. A  
1060 model of genital herpes simplex virus Type 1 infection in Rhesus Macaques. *J Med Primatol.*  
1061 2017;46(4):121-8.
- 1062 83. Aravantinou M, Mizenina O, Calenda G, Kenney J, Frank I, Lifson JD, et al.  
1063 Experimental Oral Herpes Simplex Virus-1 (HSV-1) Co-infection in Simian Immunodeficiency  
1064 Virus (SIV)-Infected Rhesus Macaques. *Front Microbiol.* 2017;8:2342.
- 1065 84. Goode D, Aravantinou M, Jarl S, Truong R, Derby N, Guerra-Perez N, et al. Sex  
1066 hormones selectively impact the endocervical mucosal microenvironment: implications for HIV  
1067 transmission. *PloS one.* 2014;9(5):e97767.

1068

1069

1070 **TABLE LEGENDS**

1071 **Table 1. SIV $\Delta$ Nef uptake and SIV protection outcomes stratified by treatment group.**

1072 SIV $\Delta$ Nef take ( $\Delta$ NEF+) is indicated as a fraction of LAV-challenged macaques that became  
1073 infected with the vaccine. Within the  $\Delta$ NEF+ macaque populations, the proportion protected at  
1074 different levels is shown (“Protection from WT”). “Complete” protection is defined herein as no  
1075 detectable SIV RNA in plasma above the limit of detection of the assay at any time. “Control” is  
1076 defined as sustained SIV viremia  $<10^4$  copies/ml. “Any” protection refers to a group comprising  
1077 both the completely protected and controller macaques. “No control” is defined as sustained  
1078 viremia  $>10^4$  copies/ml. At each level of protection, the number of macaques in the group is also  
1079 segmented by the time of SIV challenge post-LAV (i.e. 13 vs. 31 weeks). “MHC censored”  
1080 indicates that animals with protective alleles Mamu A\*01, B\*08, and B\*17 were excluded from  
1081 analysis.

1082

1083

1084 **FIGURE LEGENDS**

1085 **Figure 1. Mucosal immune stimulation promotes SIV $\Delta$ Nef vaccine take and improves**

1086 **protection. (A)** Schematic of the study design. Thirty-one macaques were divided in 4  
1087 treatment groups for 20 treatments in rectal mucosa over 10 weeks. Untreated control group  
1088 (UNTREAT) animals received PBS (n=10); HSV-2 group (HSV-2) animals received  $10^7$  pfu  
1089 HSV-2 per treatment (n=11); polyICLC group (PICLC) animals received 1 mg polyICLC  
1090 (Hiltonol®) per treatment (n=4); HSV-2/polyICLC group (HSV-2/PICLC) animals received  $10^7$   
1091 pfu HSV-2 and 1 mg polyICLC per treatment (n=6). **(B)** Uptake of SIV $\Delta$ Nef. Comparison of all  
1092 treated (TREAT) vs UNTREAT macaques (left panel) was assessed by Fisher’s Exact test and  
1093 comparison between the four treatment groups (right panel) was assessed by Chi Square test  
1094 for trend. **(C)** Protection from SIV in SIV $\Delta$ Nef+ animals. Complete protection (left panel),  
1095 controllers (middle panel), and the combination of complete protection and controllers (“Any  
1096 protection”, right panel) are shown. Comparison of all groups was made by Chi Square test for

1097 trend. **(D)** Plasma viral loads for all macaques following SIV challenge according to extent of  
1098 protection. Macaques that were exposed to but did not become infected with the LAV are  
1099 designated as “Non Vaccinated”. Treatment groups are indicated by color: HSV-2 (red), PICLC  
1100 (blue), HSV-2/PICLC (purple), UNTREAT (black). **(E)** Mean  $\pm$  SEM for the plasma viral load of  
1101 all animals at each level of protection. **(F)** SIV plasma viremia in different protection groups at  
1102 distinct phases of SIV infection. Peak viral load indicates the highest viremia between weeks 1  
1103 and 4 post-infection. Comparison between groups was made with Kruskal-Wallis test ( $P < x$ ) and  
1104 Dunns post-test for Kruskal-Wallis  $P < 0.05$ . Approximate Kruskal-Wallis p values are indicated  
1105 by ~. Dunns p values are \* $< 0.05$ , \*\* $< 0.01$ , \*\*\* $< 0.001$ .

1106

1107 **Figure 2. SIV loads in tissues segregate by level of protection.** Cell associated SIV *nef* DNA  
1108 in tissues at necropsy. Tissues examined were axillary (AX), mesenteric (MES), and iliac  
1109 (ILIAC) lymph nodes (LN) and sections of gut mucosa as shown. Bars and whiskers indicate  
1110 median  $\pm$  interquartile range (IQR). SIV copy numbers less than 1 per  $10^4$  cells are shown at 1  
1111 per  $10^4$  cells as the lower limit of detection. Jejunum and ileum were not available from IR67 or  
1112 HP47. Treatment groups are color coded as in Figure 1. Comparison between groups was  
1113 made with Kruskal-Wallis test and Dunns post-test as in Figure 1.

1114

1115 **Figure 3. Control of SIV infection is associated with preservation of functional CD4 T cell**  
1116 **subsets in the gastrointestinal tract. (A)** Peripheral blood CD4 T cell counts are shown over  
1117 time relative to treatment, vaccination, and SIV challenge for macaques at each level of  
1118 protection. The mean  $\pm$  SEM is shown for the animals in each protection group. **(B-D)**  
1119 Functional profiling of T cells in gastrointestinal mucosa by flow cytometry in absence (No Stim)  
1120 and presence (PMA/iono) of phorbol 12-myristate 13-acetate (PMA)/ionomycin stimulation. **(B)**  
1121 Phenotype of unstimulated cells showing from left to right – the frequency of live cells  
1122 (LIVE/DEAD AQUA<sup>-</sup>) within the singlet gate, frequency of CD4 T cells (AQUA<sup>-</sup>CD3<sup>+</sup>CD4<sup>+</sup>), and

1123 geometric mean fluorescence intensity (GMFI) of CD69 on CD4 T cells. Bars and whiskers  
1124 indicate median  $\pm$  IQR. **(C)** Flow cytometry for IL-17 and CD69 in unstimulated vs PMA/iono-  
1125 stimulated cells in representative SIV $\Delta$ Nef-vaccinated macaques at each of the three levels of  
1126 protection from SIV (complete protection, controller, and non-controller). **(D)** Frequency of cells  
1127 secreting IFN- $\gamma$ , IL-17, and IL-22 alone and in combination across the protection groups based  
1128 on data from **(C)**. Bars and whiskers indicate median  $\pm$  IQR. In **(B)** and **(D)**, differences between  
1129 the 3 groups were assessed by Kruskal-Wallis test ( $P=x$  shown for  $P<0.1$  and considered  
1130 significant for  $P<0.05$ ). In **(D)**, comparison of non-controllers with the other groups was made  
1131 using the Mann-Whitney test (\* indicates Mann Whitney  $p<0.05$ ). Throughout, treatment groups  
1132 are color coded as in Figure 1 and symbols are as in Figure 1.

1133

1134 **Figure 4. HSV-2 rectal shedding is decreased by polyICLC and tends to be increased with**  
1135 **SIV pathogenesis.** HSV-2 shedding in rectal mucosa was assessed in uncleared rectal swabs  
1136 collected over the course of infection comprising both the LAV (Weeks post SIV $\Delta$ Nef) and SIV  
1137 (Weeks post SIV) phases of the study. **(A)** Heat map depicting the relative quantities of HSV-2  
1138 gD detected in swabs over time by nested PCR (nPCR). Each row represents a macaque and  
1139 each column a time point. The legend indicates the number of PCR reactions (of 6 total) that  
1140 produced an HSV-2 amplicon. “nd” indicates that no sample was available for testing. **(B)** The  
1141 relative level of shedding (number of amplicon-producing reactions of 6 total) detected in  
1142 macaques 24 hours after the 20<sup>th</sup> HSV-2/polyICLC exposure. Each symbol is a macaque;  
1143 symbols are as in Figure 1. **(C)** Characteristics of shedding throughout the remainder of the  
1144 study. Frequency of shedding (left) was calculated as the number of time points with shedding  
1145 divided by all time points tested. Level of shedding (right) was calculated as the number of  
1146 positive nPCR reactions divided by the number of time points on which shedding was detected.  
1147 Each symbol represents a time point. **(D)** Shedding during the SIV phase: (Left) proportion of  
1148 animals shedding at any post-SIV time point. (Center) Proportion of post-SIV time points with

1149 shedding. (Right) Number of PCR reactions with amplicon on post-SIV time points with  
1150 shedding. Each symbol is an animal as in Figure 1. **(E)** Frequency of shedding during the SIV  
1151 phase stratified by protection group. In **(B)**, **(C)**, and **(D)**, groups were compared by Mann  
1152 Whitney test. In **(E)**, groups were compared by Chi squared test. P values <0.05 were  
1153 considered significant.

1154

1155 **Figure 5. HSV-2 but not polyICLC elicits systemic type I IFN responses.** Messenger RNA  
1156 (mRNA) was measured in PBMCs for the genes indicated. Data are shown for **(A)** 7 days after  
1157 the last treatment, which was the day of vaccination, **(B)** 1 week post-LAV, and **(C)** 2 weeks  
1158 post-SIV. Bars and whiskers indicate mean  $\pm$  SEM. Throughout, treatment groups are color  
1159 coded as in Figure 1 and symbols are as in Figure 1. Comparison of all groups for each mRNA  
1160 was performed using the Kruskal Wallis test ( $P$ -x shown for  $P<0.05$ ) with Dunns post test for  
1161 Kruskal Wallis  $P<0.05$ . \* indicates Dunns  $p<0.05$ . The HSV-2/PICLC group was also compared  
1162 with UNTREAT by Mann Whitney test. In **(C)**, controllers were compared with the other groups  
1163 by Mann Whitney test.

1164

1165 **Figure 6. Absence of post-acute SIV $\Delta$ Nef viremia defines controller phenotype.** **(A)**  
1166 SIV $\Delta$ Nef loads in plasma of macaques according to their level of protection from SIV. Treatment  
1167 groups are color coded as in Figure 1 and symbols are as in Figure 1. **(B)** Mean  $\pm$  SEM for the  
1168 SIV $\Delta$ Nef plasma levels of all animals at each level of protection. **(C)** Comparison of SIV $\Delta$ Nef  
1169 viremia across protection groups at peak (highest viral load between weeks 2-4 post-  
1170 vaccination, left), week 8 (center), and the day of SIV challenge (right). Each symbol is an  
1171 animal as in (A). **(D)** Comparison of SIV $\Delta$ Nef plasma viral load across treatment groups at peak  
1172 viremia. **(E)** SIV $\Delta$ Nef plasma viral load following SIV challenge in vaccinated macaques. Fold  
1173 change within the first week after SIV challenge is shown on the top. Area under the curve  
1174 (AUC) of the SIV $\Delta$ Nef plasma viral load during the 16 weeks of follow up post-SIV challenge is

1175 on the bottom. **(F)** Cell associated SIV $\Delta$ Nef DNA in tissues at necropsy. Tissues examined are  
1176 the same as in Figure 1. **(G)** Cell associated SIV $\Delta$ Nef DNA in rectal tissue cells and PBMCs at 8  
1177 weeks post-LAV. In **(C-G)**, bars and whiskers indicate mean  $\pm$  SEM. Comparisons between  
1178 groups were made with Kruskal-Wallis test and Dunns post-test for Kruskal-Wallis  $P < 0.05$ .

1179

1180 **Figure 7. Persistent SIV $\Delta$ Nef replication in lymph nodes is not sufficient for protection.**

1181 SIV growth was measured in co-cultures of CEMx174 cells with LNMCs or PBMCs from  
1182 macaques 29 weeks post-LAV. Cells and supernatant were collected for analysis after 21 days  
1183 of co-culture. **(A)** Flow cytometry plots from representative co-cultures from each protection  
1184 group with axillary lymph node LNMCs (top) and PBMCs (bottom). Labeling for SIV gag p27 and  
1185 CD4 is shown. **(B)** The percentage of p27<sup>+</sup> cells is shown for all macaques tested (those  
1186 challenged 31 weeks post-LAV). **(C)** p27 in the culture supernatant was quantified by ELISA. In  
1187 **(B)** and **(C)**, bars and whiskers represent median  $\pm$  IQR. Groups were compared by Kruskal  
1188 Wallis test with Dunns post test for Kruskal-Wallis  $P < 0.05$ .

1189

1190 **Figure 8. Pre-challenge CD4 T cell phenotype predicts protection outcomes.** CD4 T cells

1191 within LNMCs and PBMCs from 29 weeks post-LAV were assessed by multicolor flow  
1192 cytometry. **(A)** Gating of CD4 T cells by CD3 and CD4 expression within the live (LIVE/DEAD  
1193 AQUA-) small cell singlet gate. **(B)** Gating of inguinal lymph node cells by PD-1 and CD200  
1194 expression. **(C)** CXCR5 and CD95 expression on PD-1<sup>high</sup>CD200<sup>+</sup> Tfh in lymph node. **(D)** PD-  
1195 1<sup>high</sup>CD200<sup>+</sup> Tfh frequencies in LNMCs and PBMCs by protection group. **(E)** Correlation  
1196 between Tfh frequency and concurrent SIV $\Delta$ Nef plasma viral load. Spearman  $r$  and  $p$  values are  
1197 shown. **(F)** CXCR5 and CD95 expression on PD-1<sup>low</sup>CD200<sup>+</sup> CD4 T cells from lymph node. **(G)**  
1198 PD-1<sup>low</sup>CD200<sup>+</sup> CD4 T cell frequencies in LNMCs by protection group. **(H)** CXCR5<sup>high</sup> cells within  
1199 total lymph node CD4 T cells. **(I)** CXCR5<sup>high</sup> CD4 T cell frequencies in LNMCs and PBMCs by  
1200 protection group. **(J)** Gating of CXCR5<sup>high</sup> CD4 T cells from lymph node by CXCR3 and CCR6



1201 expression. **(K)** Frequency of CXCR3<sup>+</sup>CCR6<sup>+</sup> Th1Th17 cells within LNMCs and PBMCs by  
1202 protection group. **(L)** Gating of CXCR3<sup>+</sup>CCR6<sup>+</sup> cells within total lymph node CD4 T cells. **(M)**  
1203 Frequency of CXCR3<sup>+</sup>CCR6<sup>+</sup> CD4 T cells within LNMCs and PBMCs by protection group.  
1204 Throughout, groups were compared by Kruskal Wallis test with Dunns post test unless  
1205 otherwise noted. Bars and whiskers indicate median  $\pm$  IQR. Treatment groups are color coded  
1206 as in Figure 1 and symbols are as in Figure 1.

1207

1208 **Figure 9. Neutralizing antibody frequency reflects the LAV load and does not predict**  
1209 **protection. (A)** The frequency of binding antibodies on the day of SIV challenge in plasma is  
1210 shown for all 31 macaques in the study. Binding antibodies are quantified as the optical density  
1211 (OD) in ELISA of plasma at a 1:2560 dilution binding to SIVmac1A11 gp140. **(B)** The frequency  
1212 of neutralizing antibodies on the day of SIV challenge in plasma for 31 macaques. Neutralizing  
1213 antibodies are quantified as the copy number of SIV *gag* detected in culture supernatants of  
1214 CEMx174 cells in the presence of baseline plasma minus the copy number in the presence of  
1215 immune plasma from day of SIV challenge divided by the copy number in the presence of  
1216 baseline plasma. All plasmas were used at 1:640 dilution. **(C)** Correlation between neutralizing  
1217 antibodies and the concurrent SIV $\Delta$ Nef plasma viremia. **(D)** Correlation between neutralizing  
1218 antibodies and the peak SIV plasma viremia in animals that became SIV+.

1219

1220 **Figure 10. Polyfunctionality and a CD8 helper phenotype correlate with protection**  
1221 **outcomes.** The frequency and phenotype of SIV *gag*- and *env*-specific T cells were analyzed  
1222 by intracellular cytokine flow cytometry using LNMCs isolated 7 days post-SIV challenge from  
1223 axillary lymph nodes of macaques challenged 31 weeks post-LAV. Data for CD8 T cells are  
1224 shown. **(A)** Production of IFN $\gamma$  (top) and TNF $\alpha$  (bottom) in response to SIV *gag* peptide pool vs  
1225 media (No peptide) shown for a representative macaque. Production of IL2 is not shown. **(B)**  
1226 Frequency of CD8 T cells expressing the indicated cytokine or surface marker in response to

1227 gag pool and env pool in each macaque shown by protection group. Each macaque is shown  
1228 twice – once for gag response and once for env response. Colors and symbols are as in Figure  
1229 1. **(C)** Proportion of total CD8 T cell response attributable to each cytokine. Each macaque is  
1230 shown twice, indicating the gag- and env-specific responses. **(D)** CD40L surface expression on  
1231 CD8 T cells in response to PMA/ionomycin stimulation.

1232

1233

### 1234 **SUPPORTING INFORMATION**

1235 **Figure S1. Plasma viral loads during the LAV and SIV phases of the study.** Plasma viral  
1236 loads for SIV $\Delta$ Nef (filled symbols) and SIV (open symbols) are shown for each animal. Both  
1237 viral loads were measured by PCR in *nef* or the region overlapping the *nef* deletion. Animals are  
1238 grouped in columns according to level of protection from SIV and color coded according to  
1239 treatment group as follows: HSV-2 (red), polyICLC (blue), HSV-2/polyICLC (purple), Untreated  
1240 (black). MHC haplotypes Mamu\*A01, \*B08, and \*B17 are indicated.

1241

1242 **Figure S2. MHC censored Figure 1.**

1243

1244 **Figure S3. MHC censored Figure 2.**

1245

1246 **Figure S4. MHC censored Figure 3.**

1247

1248 **Figure S5. Mucosal innate responses to low dose HSV-2 do not indicate immune**  
1249 **dysregulation. (A)** Luminex data for representative immune mediators in clarified rectal swabs  
1250 from 24 hours after the last HSV-2 and polyICLC treatment. **(B)** Luminex data for representative  
1251 immune mediators in plasma from the same time point. **(C)** Surface phenotype of rectal CD4 T  
1252 cells from 8 weeks post-SIV $\Delta$ Nef.

1253

1254 **Figure S6. MHC censored Figure 6.**

1255

1256 **Figure S7. MHC censored Figure 7.**

1257

1258 **Figure S8. MHC censored Figure 8.**

1259

1260 **Figure S9. MHC censored Figure 9.**

1261

1262 **Figure S10. SIV-specific CD4 T cell responses.** The frequency and phenotype of SIV gag-  
1263 and env-specific CD4 T cells were analyzed by intracellular cytokine flow cytometry as in Figure  
1264 10 for CD8 T cells using LNMCs isolated 7 days post-SIV challenge from axillary lymph nodes  
1265 of macaques challenged 31 weeks post-LAV. Data for CD4 T cells are shown. **(A)** Production of  
1266 IFN $\gamma$  (top), TNF $\alpha$  (middle), and IL2 (bottom) in response to SIV gag peptide pool vs media (No  
1267 peptide) shown for a representative macaque. **(B)** Frequency of CD4 T cells expressing the  
1268 indicated cytokine or surface marker in response to gag pool and env pool in each macaque  
1269 shown by protection group. Each macaque is shown twice – once for gag response and once  
1270 for env response. Colors and symbols are as in Figure 1. **(C)** Proportion of total CD4 T cell  
1271 response attributable to each cytokine. Each macaque is shown twice, indicating the gag- and  
1272 env-specific responses. **(D)** CD40L surface expression on CD8 T cells in response to  
1273 PMA/ionomycin stimulation.

1274

1275 **Figure S11. MHC censored Figure 10.**

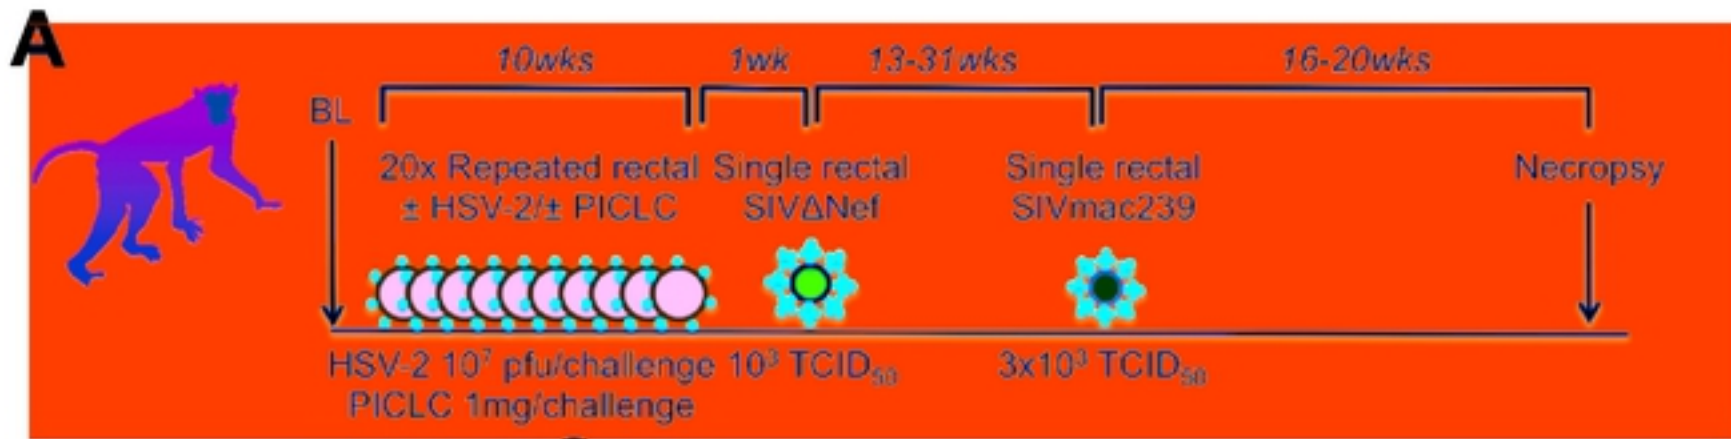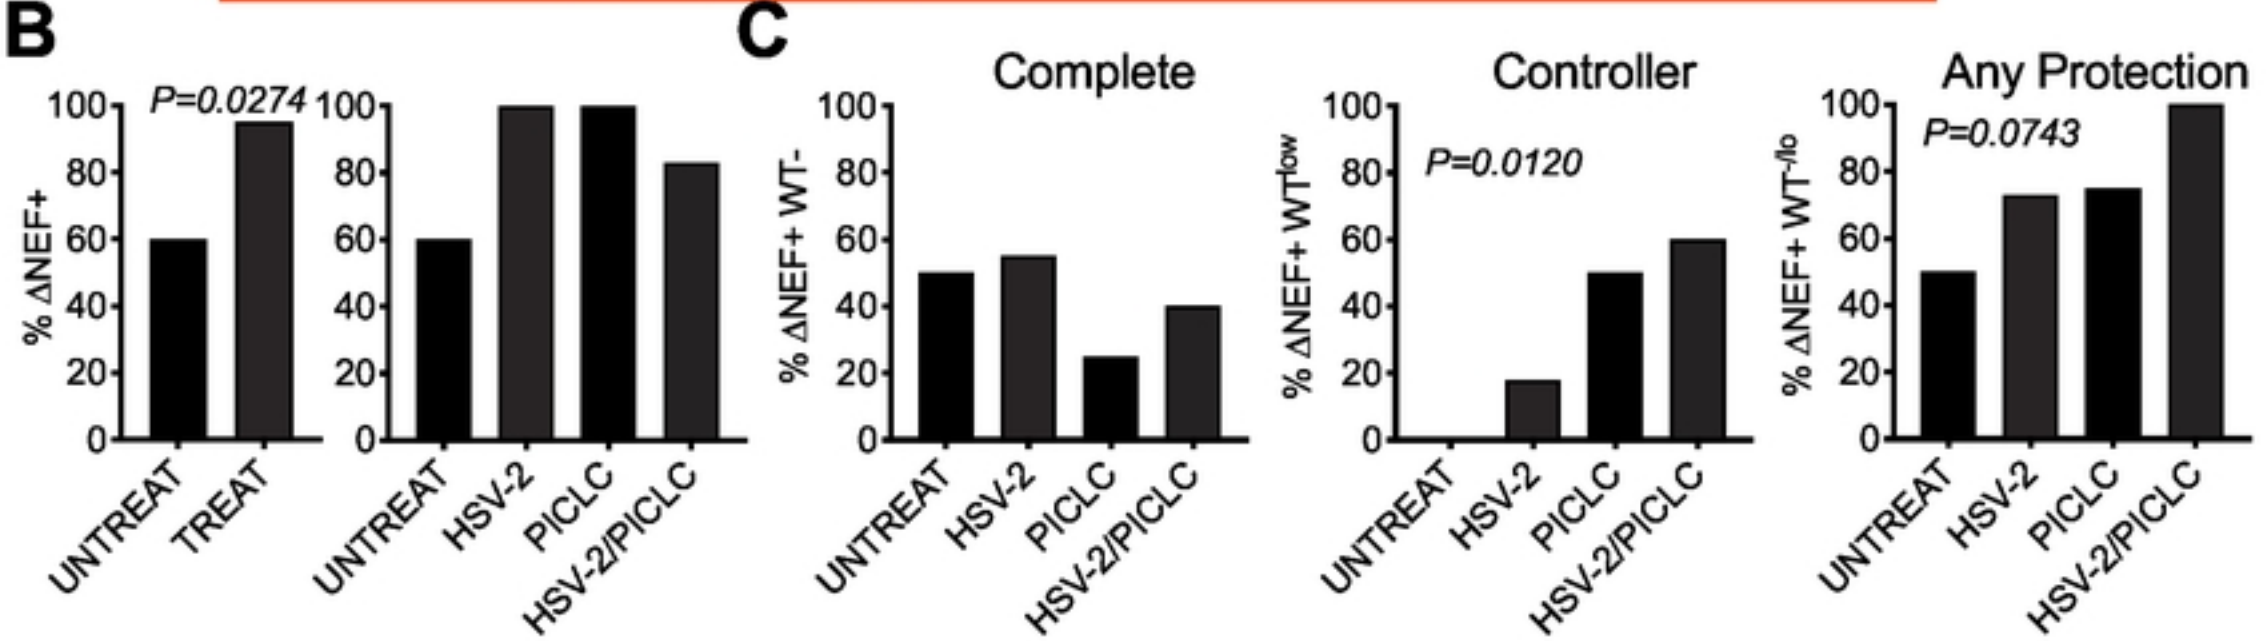

bioRxiv preprint doi: <https://doi.org/10.1101/2020.06.02.129494>; this version posted June 2, 2020. The copyright holder for this preprint (which was not certified by peer review) is the author/funder, who has granted bioRxiv a license to display the preprint in perpetuity. It is made available under aCC-BY 4.0 International license.

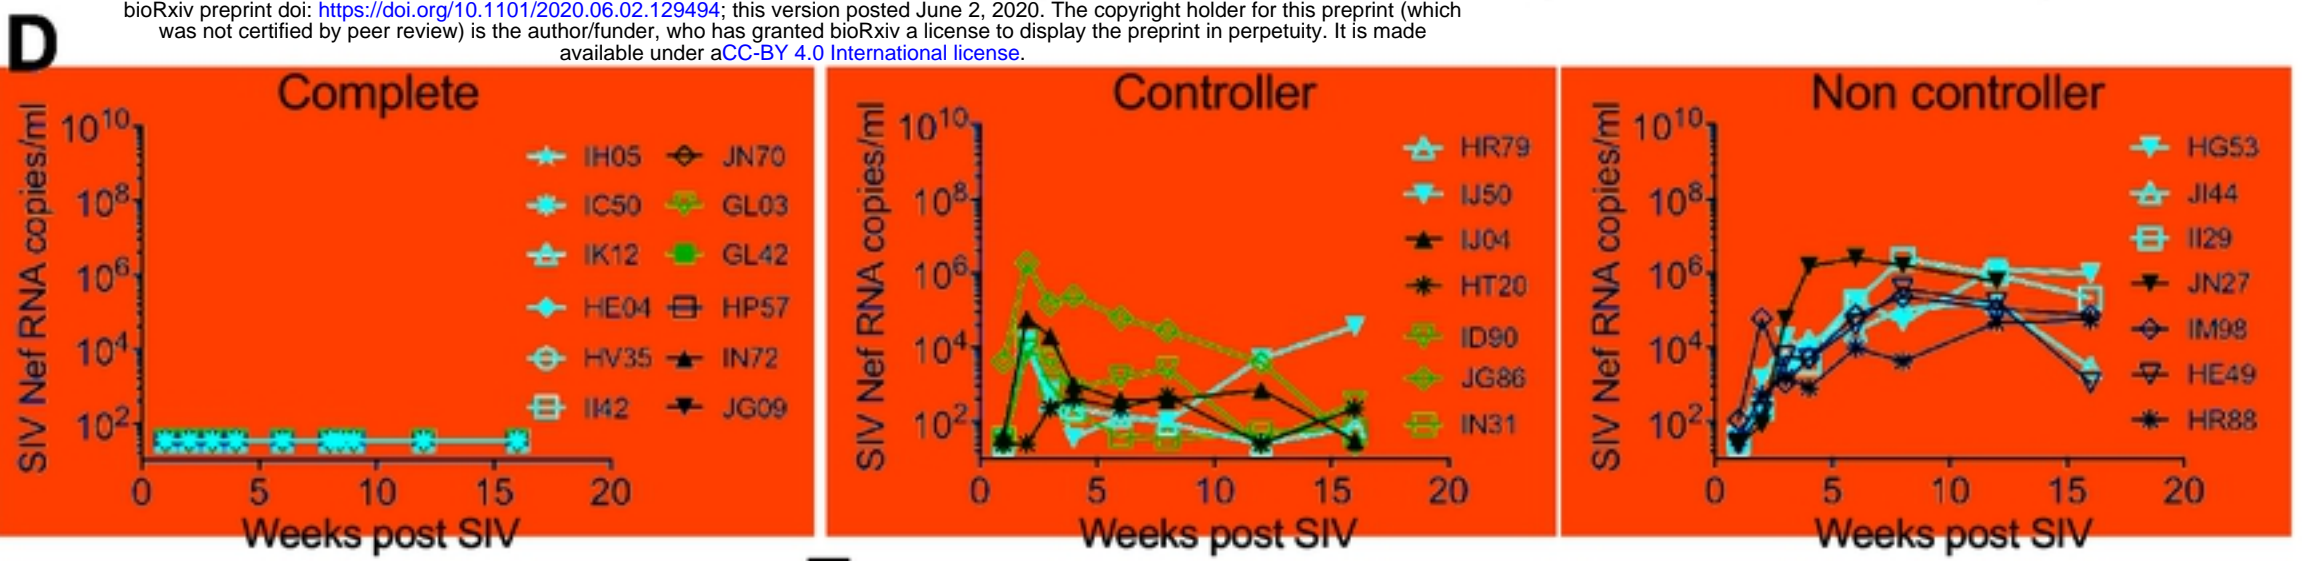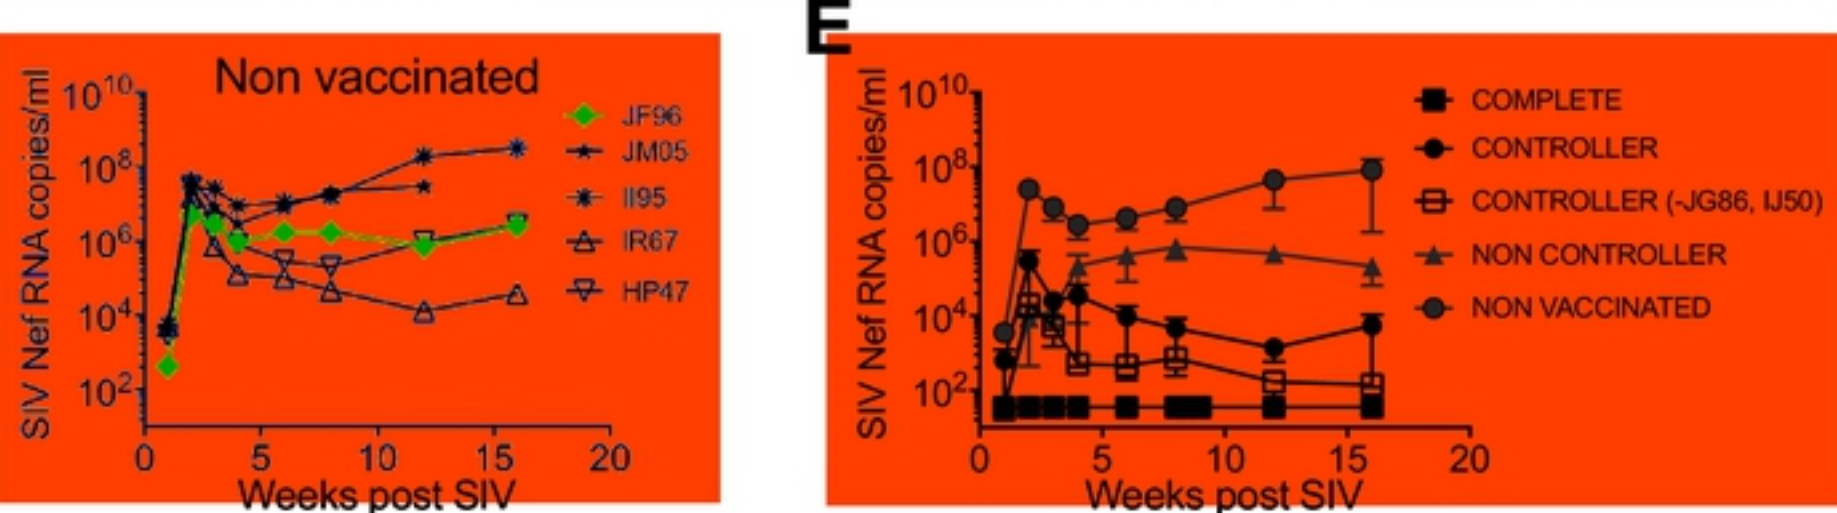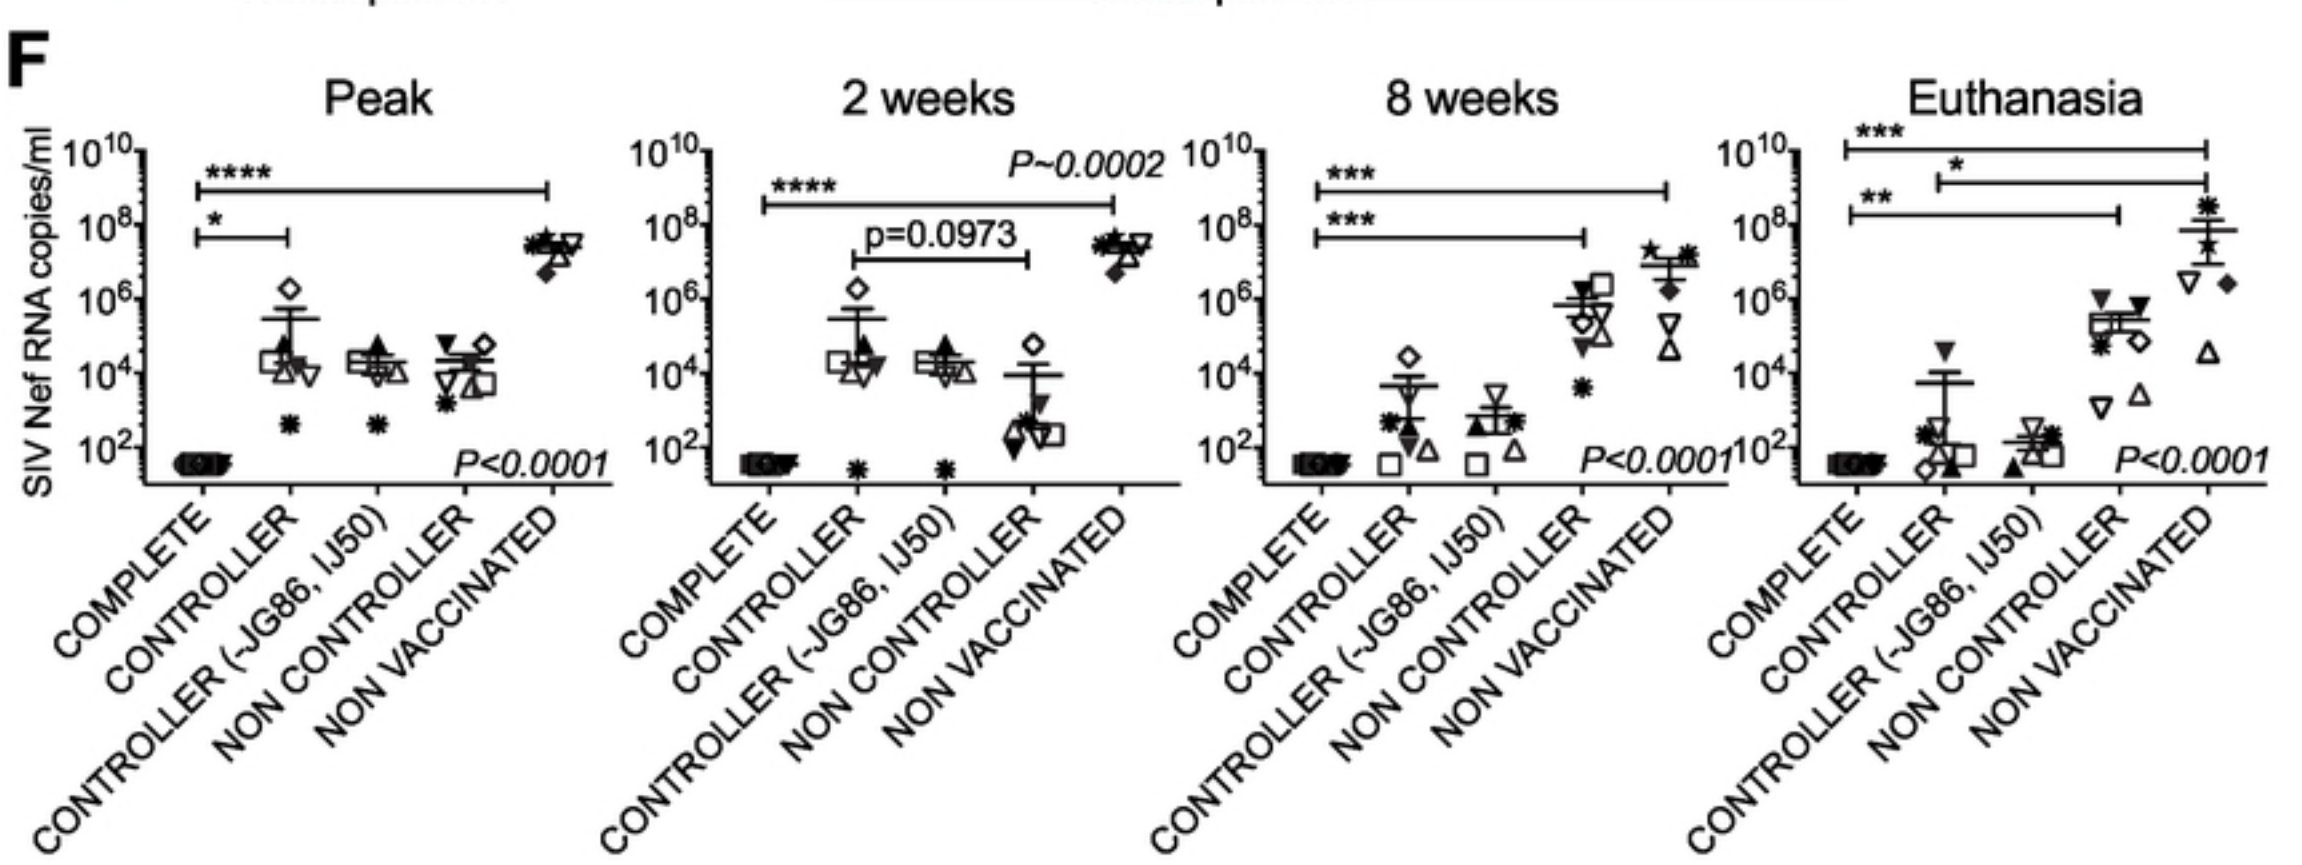

Figure 1



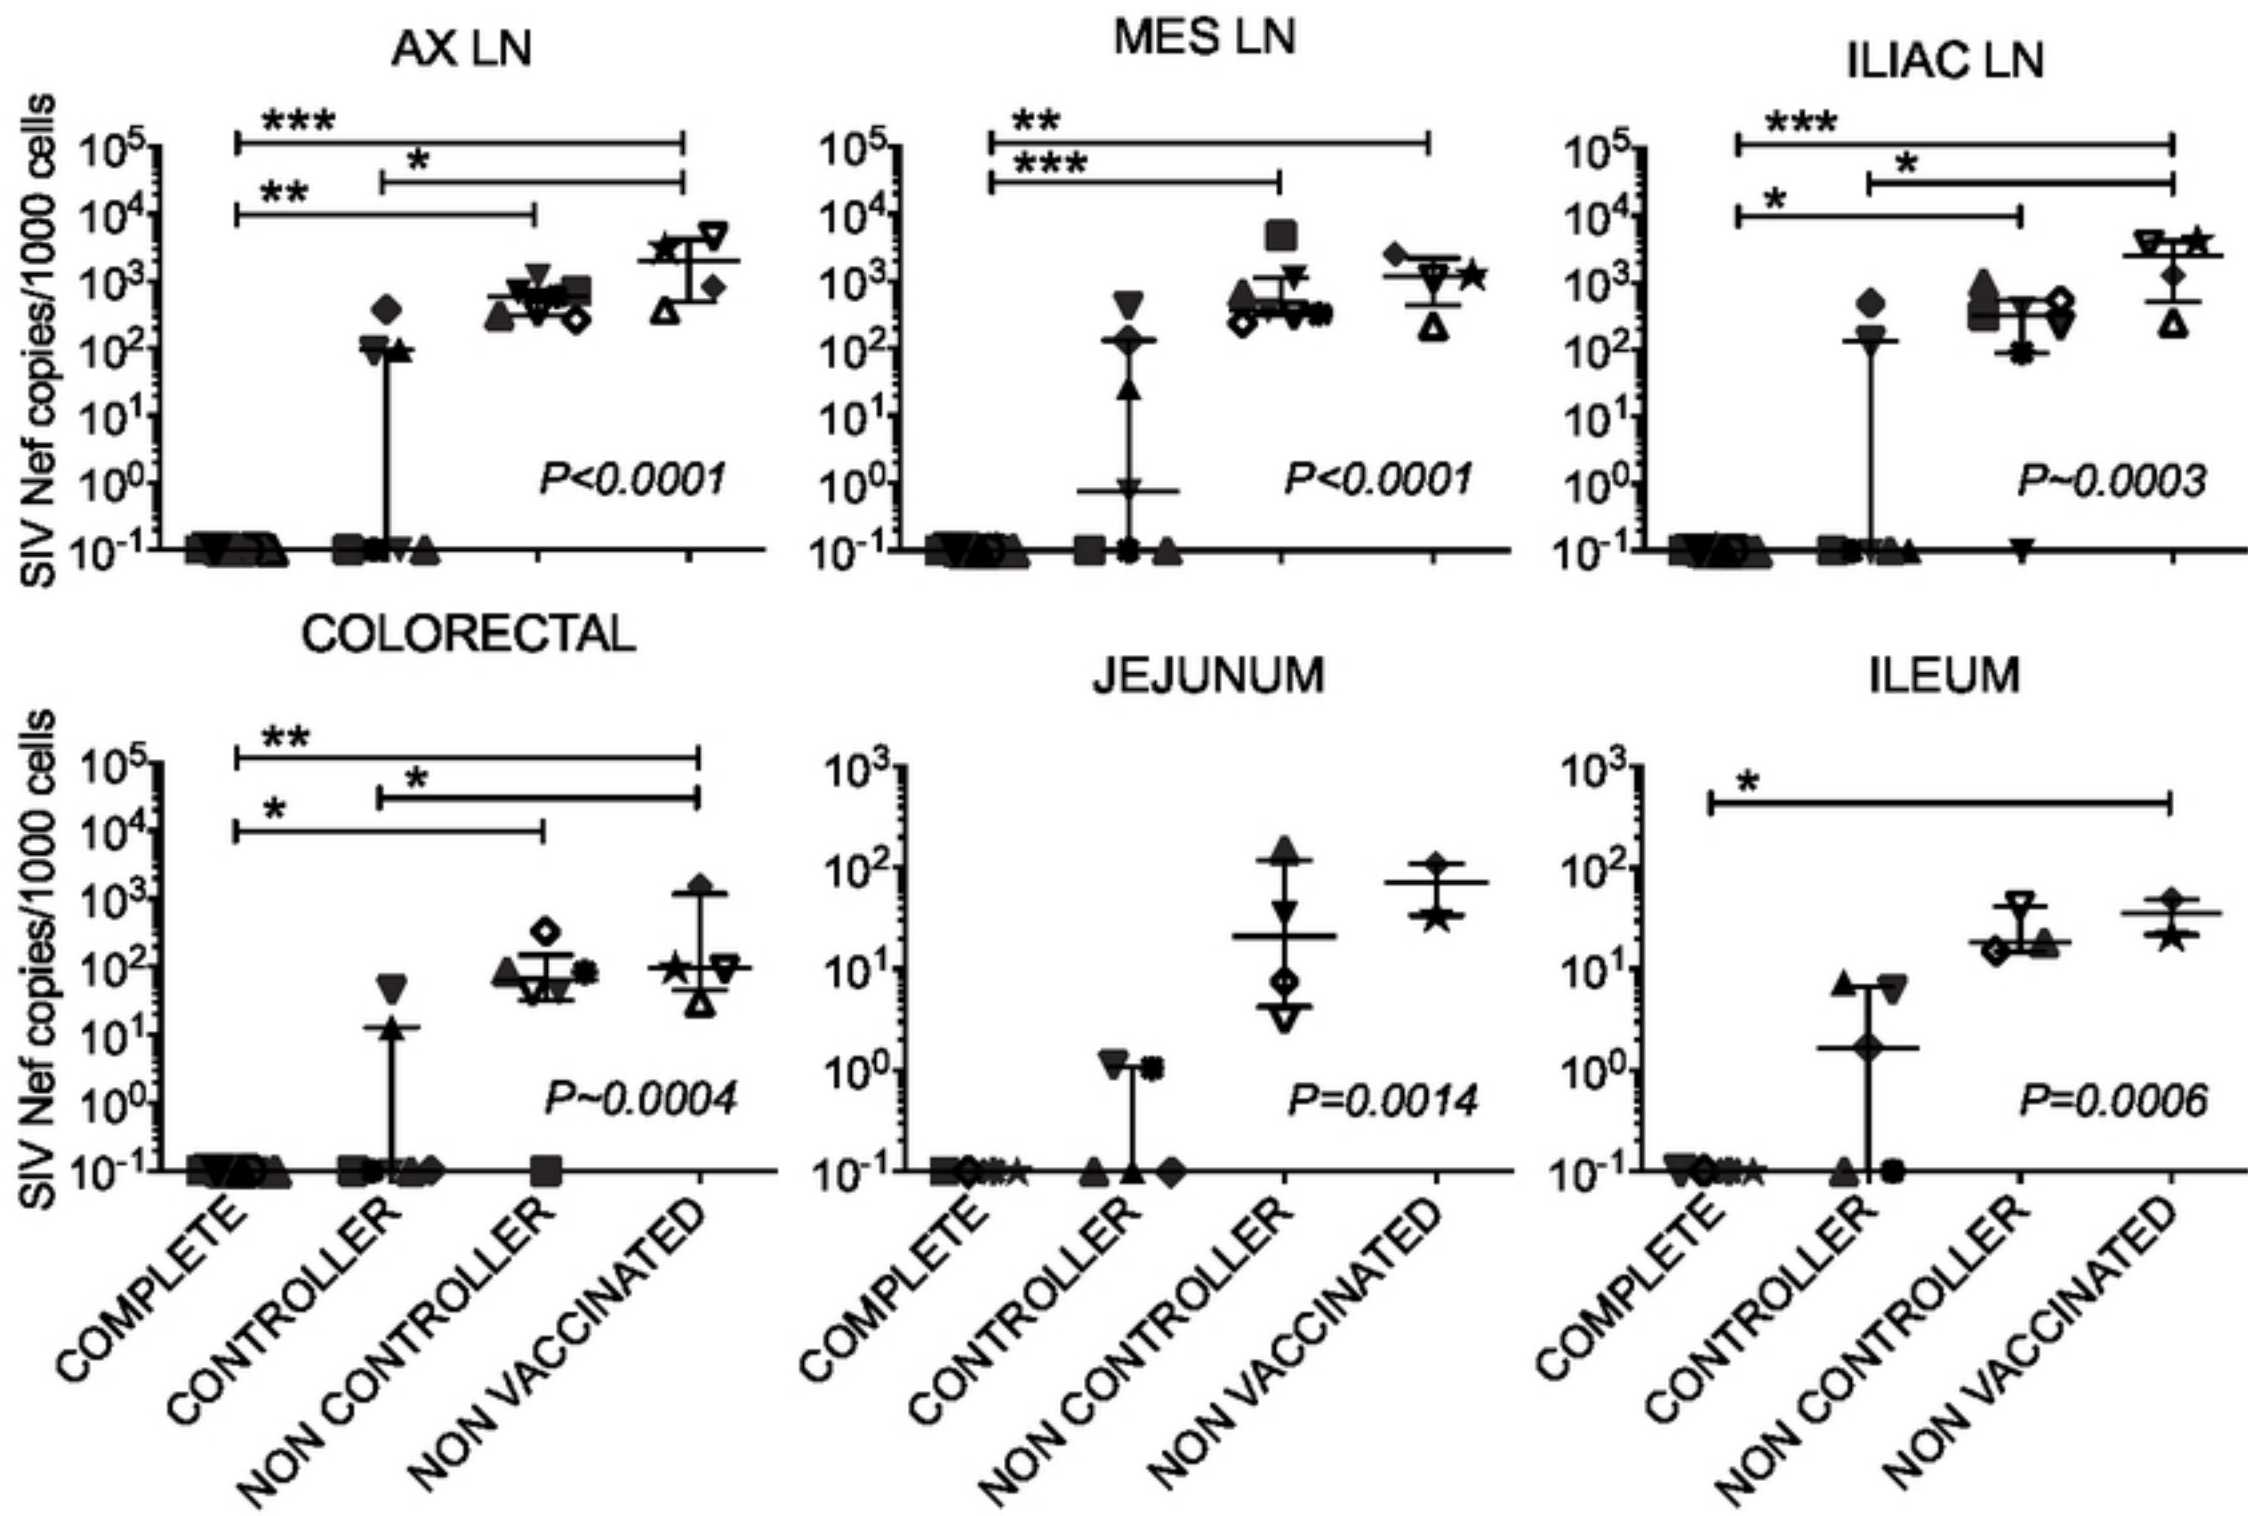

Figure 2

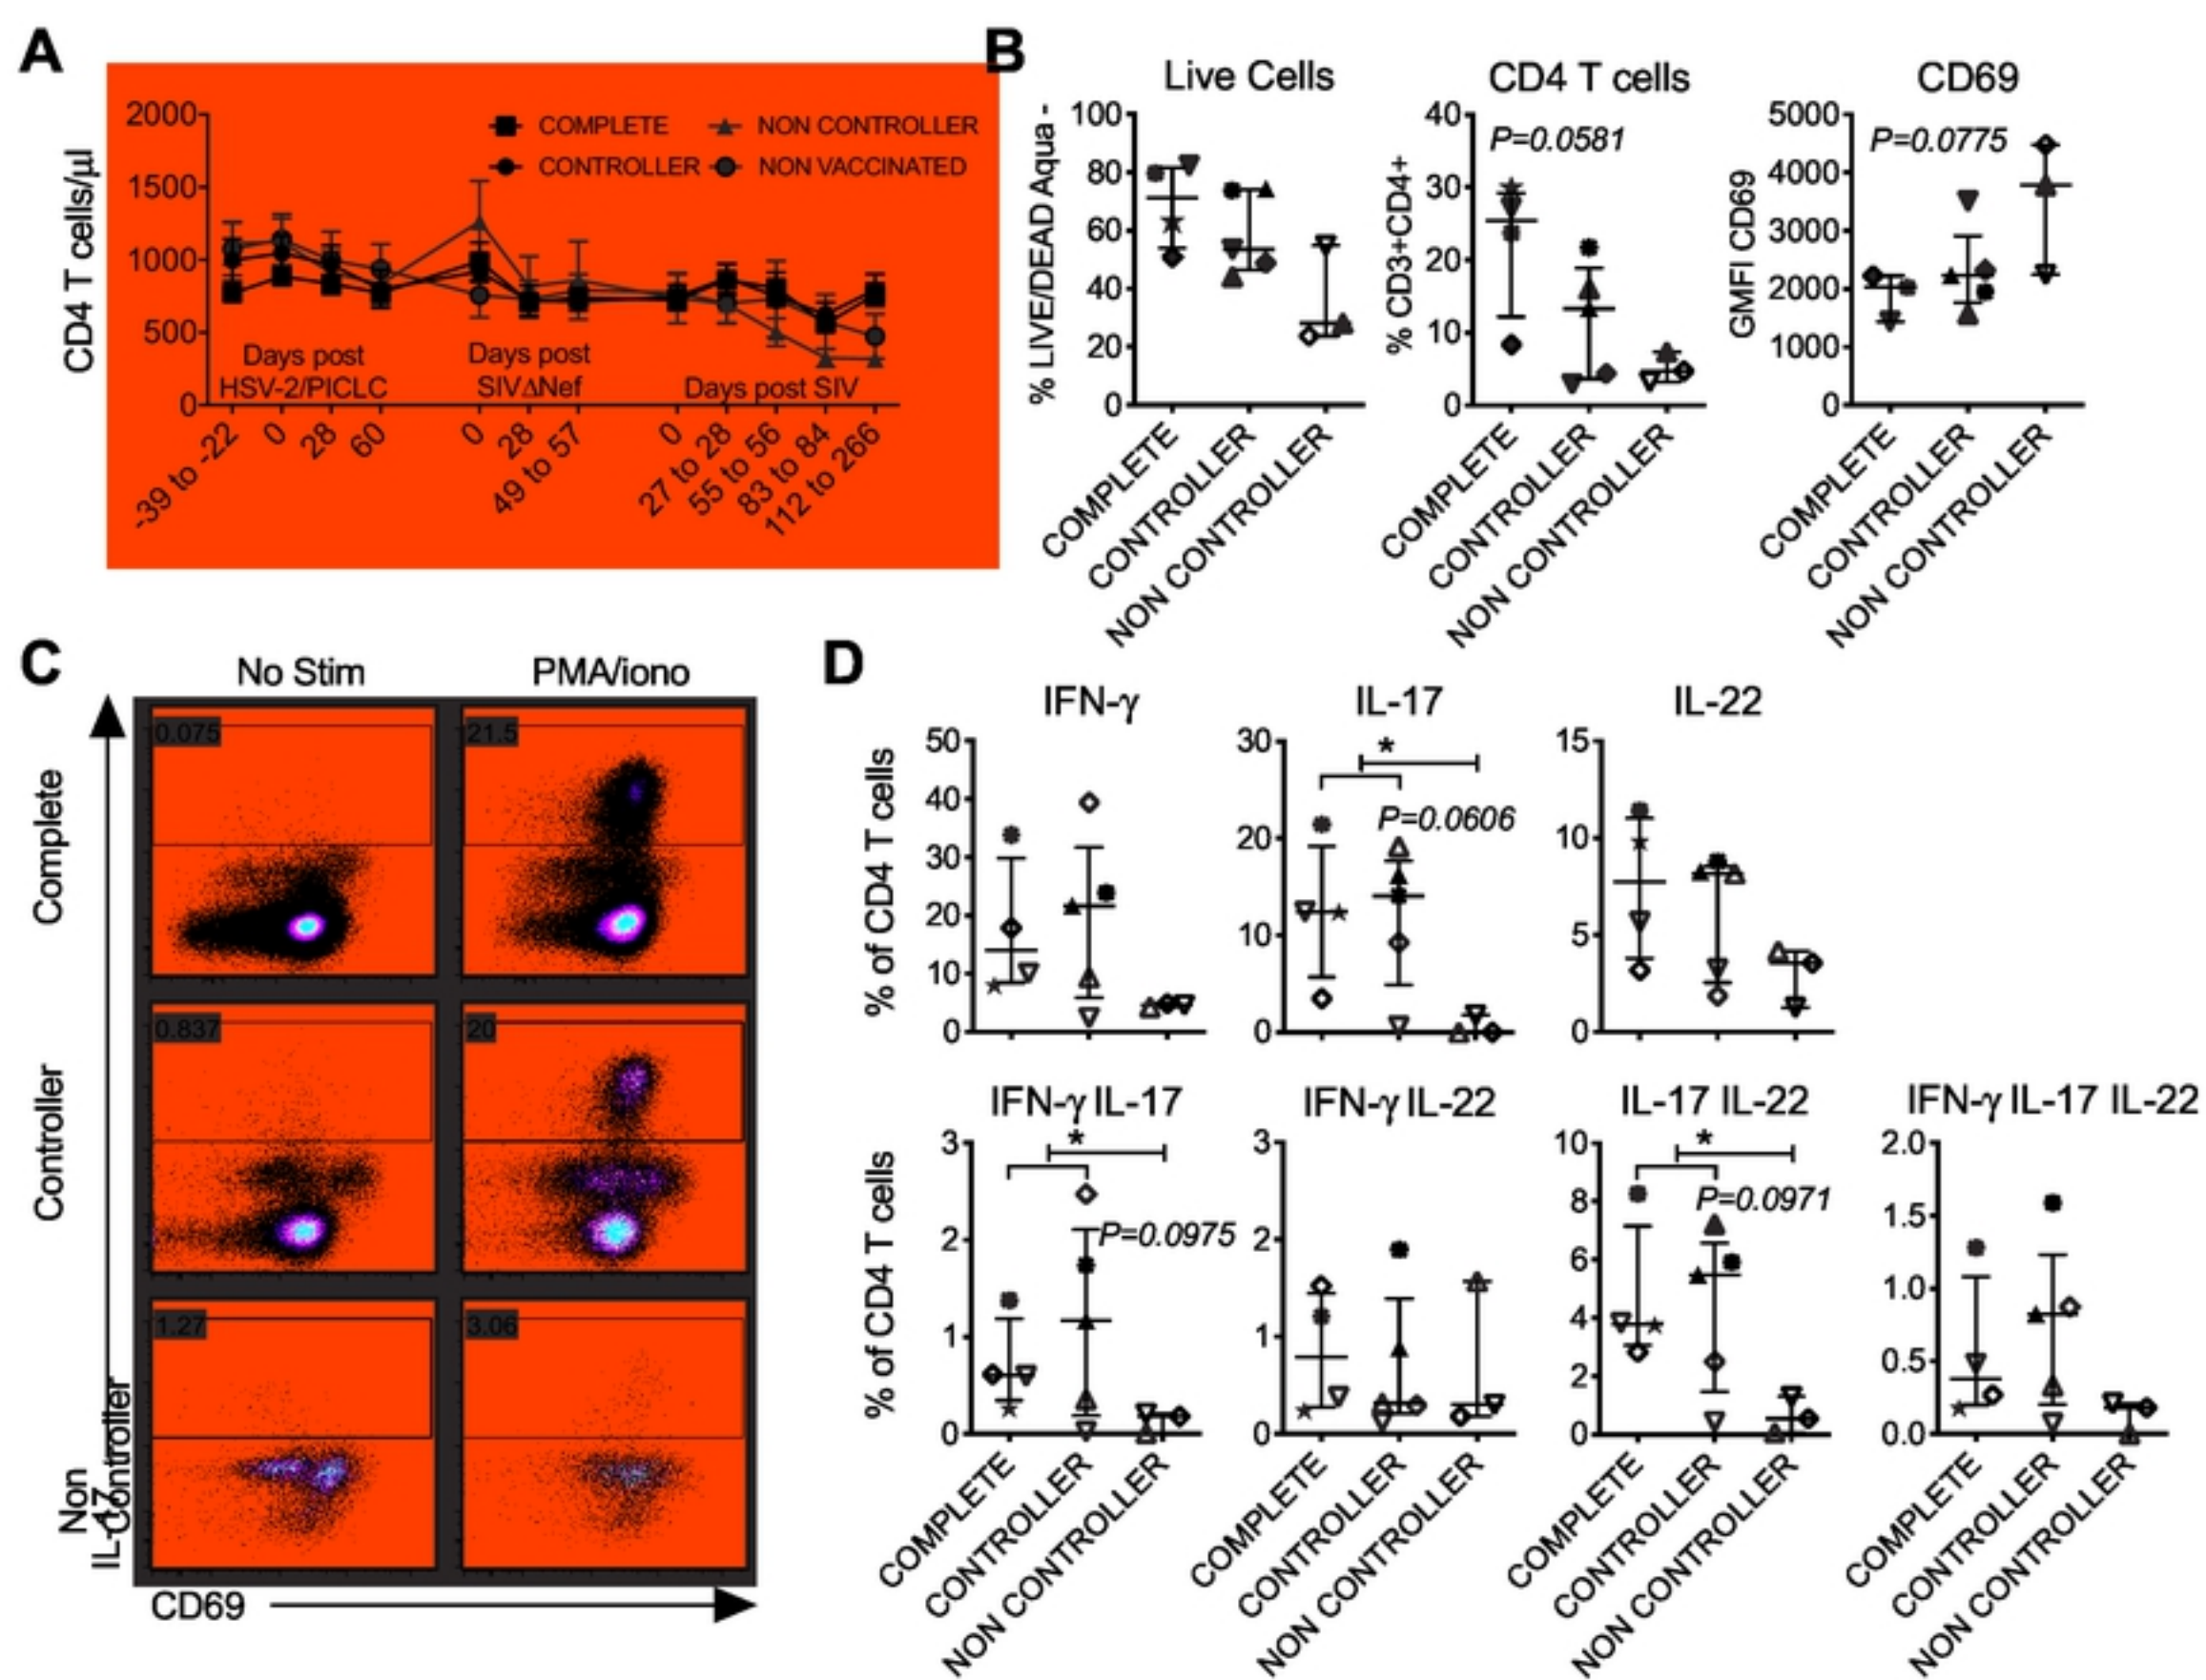

Figure 3





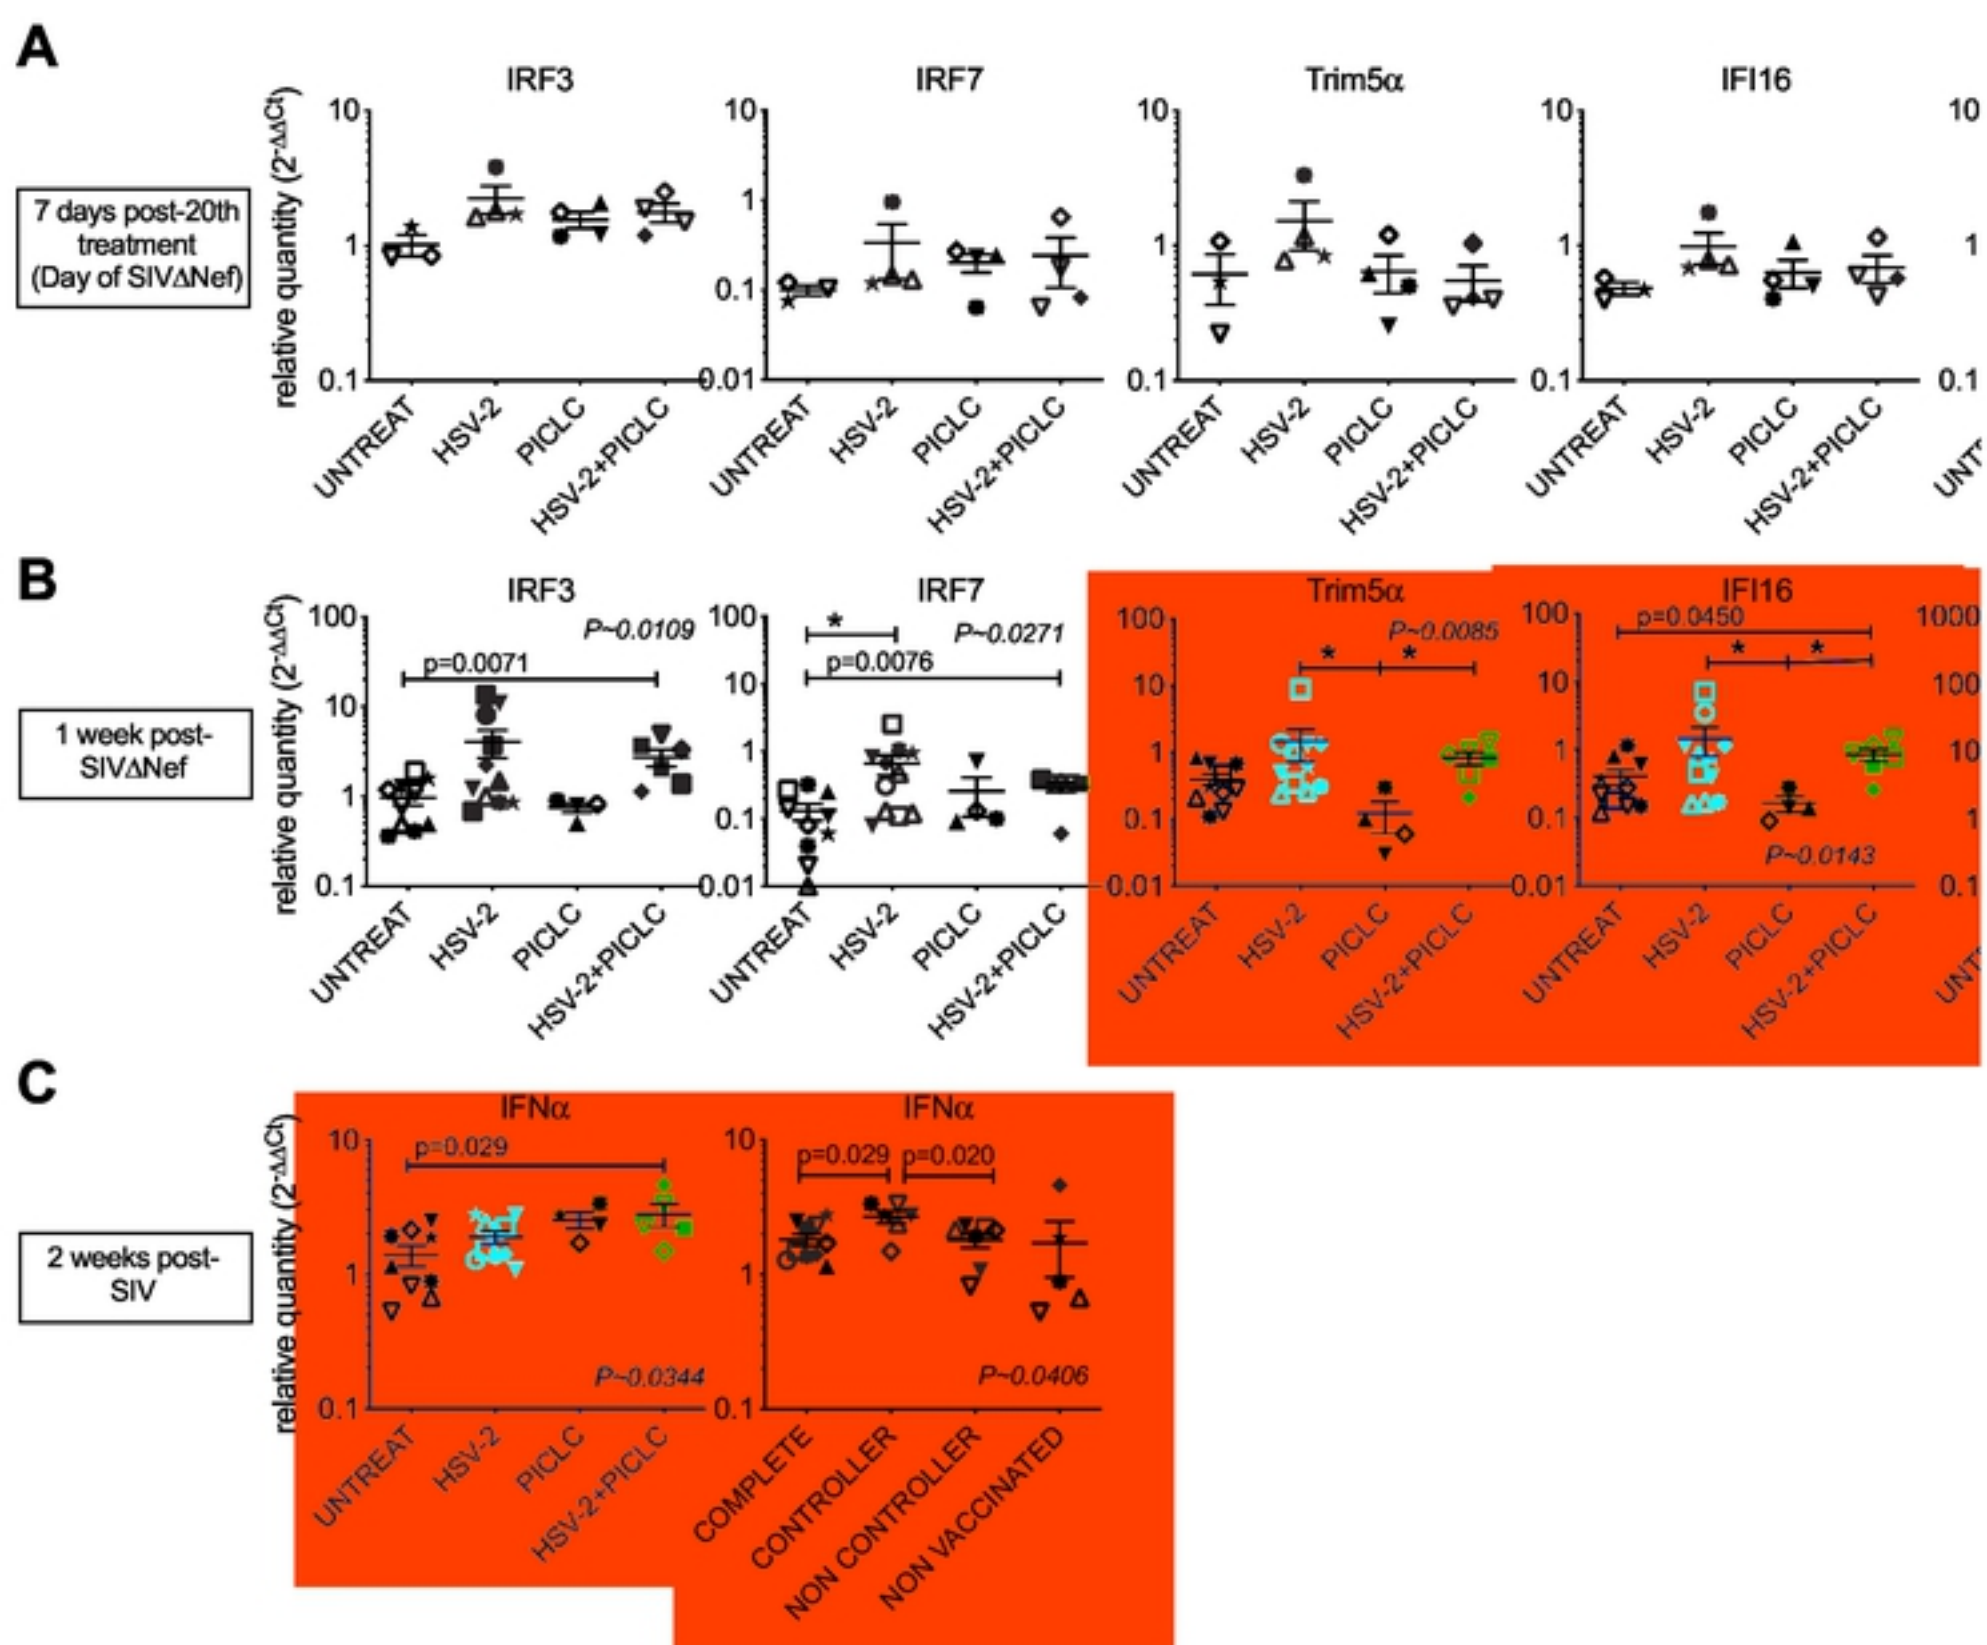

Figure 5

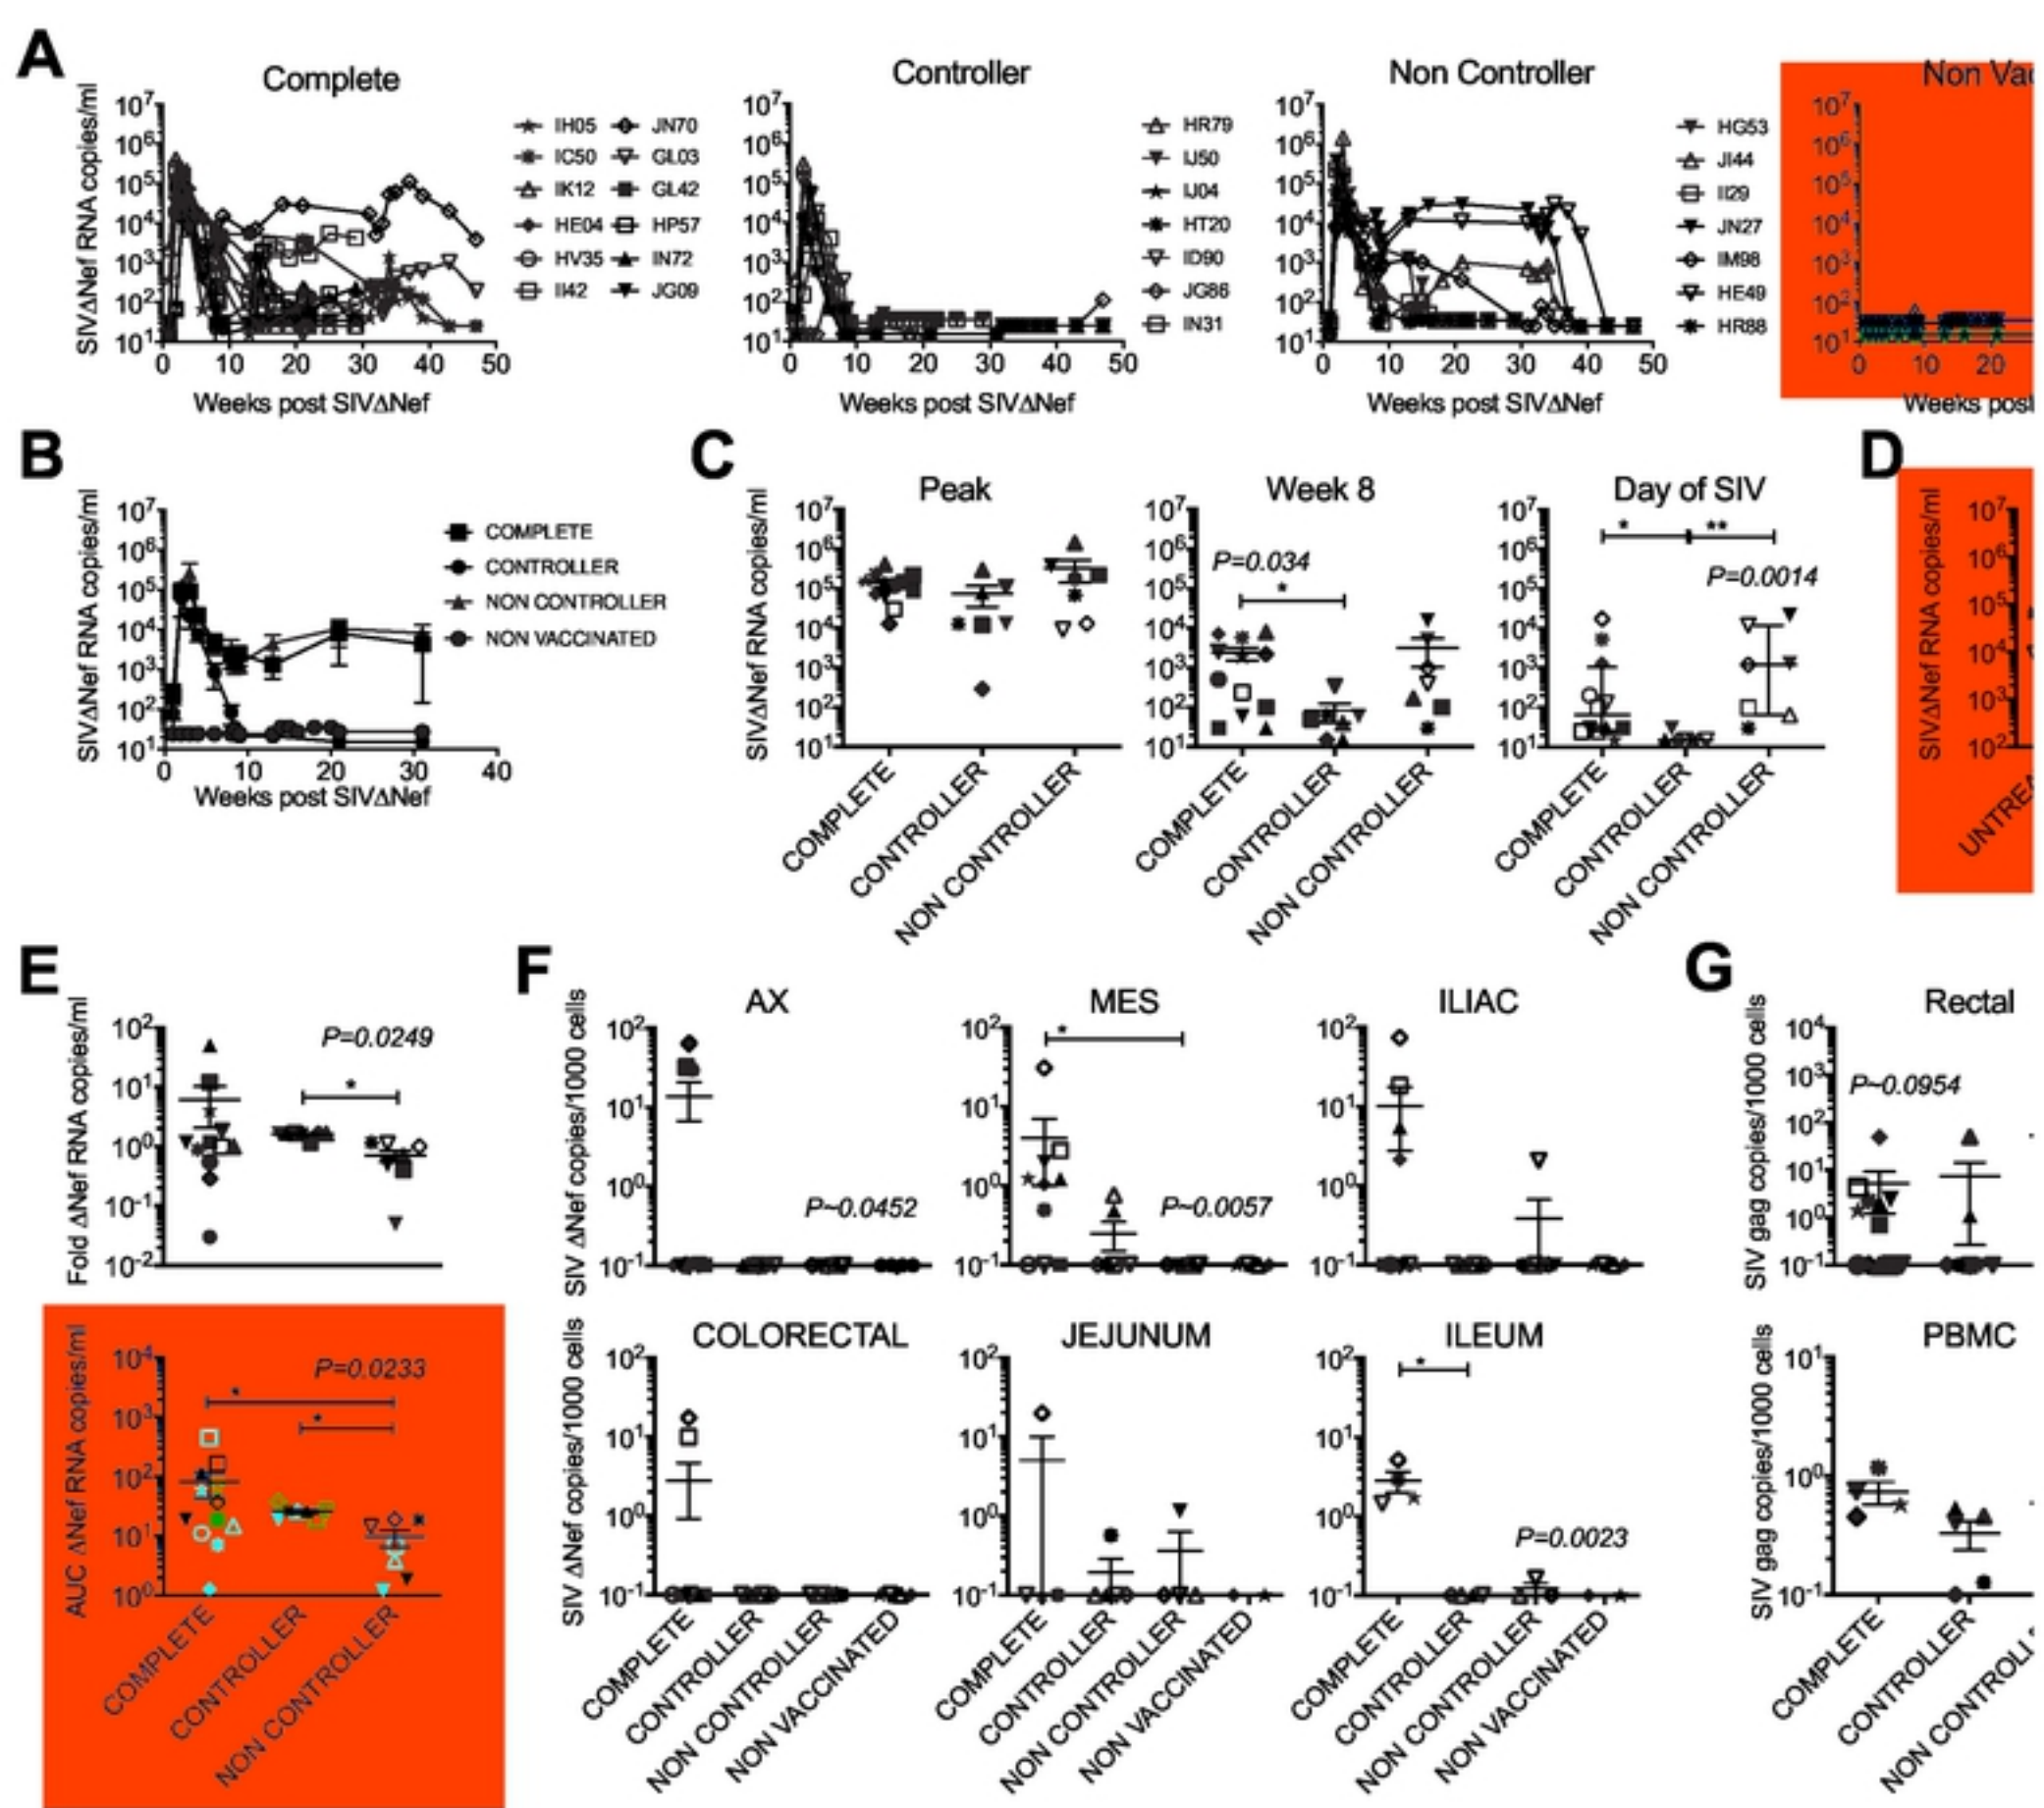

Figure 6

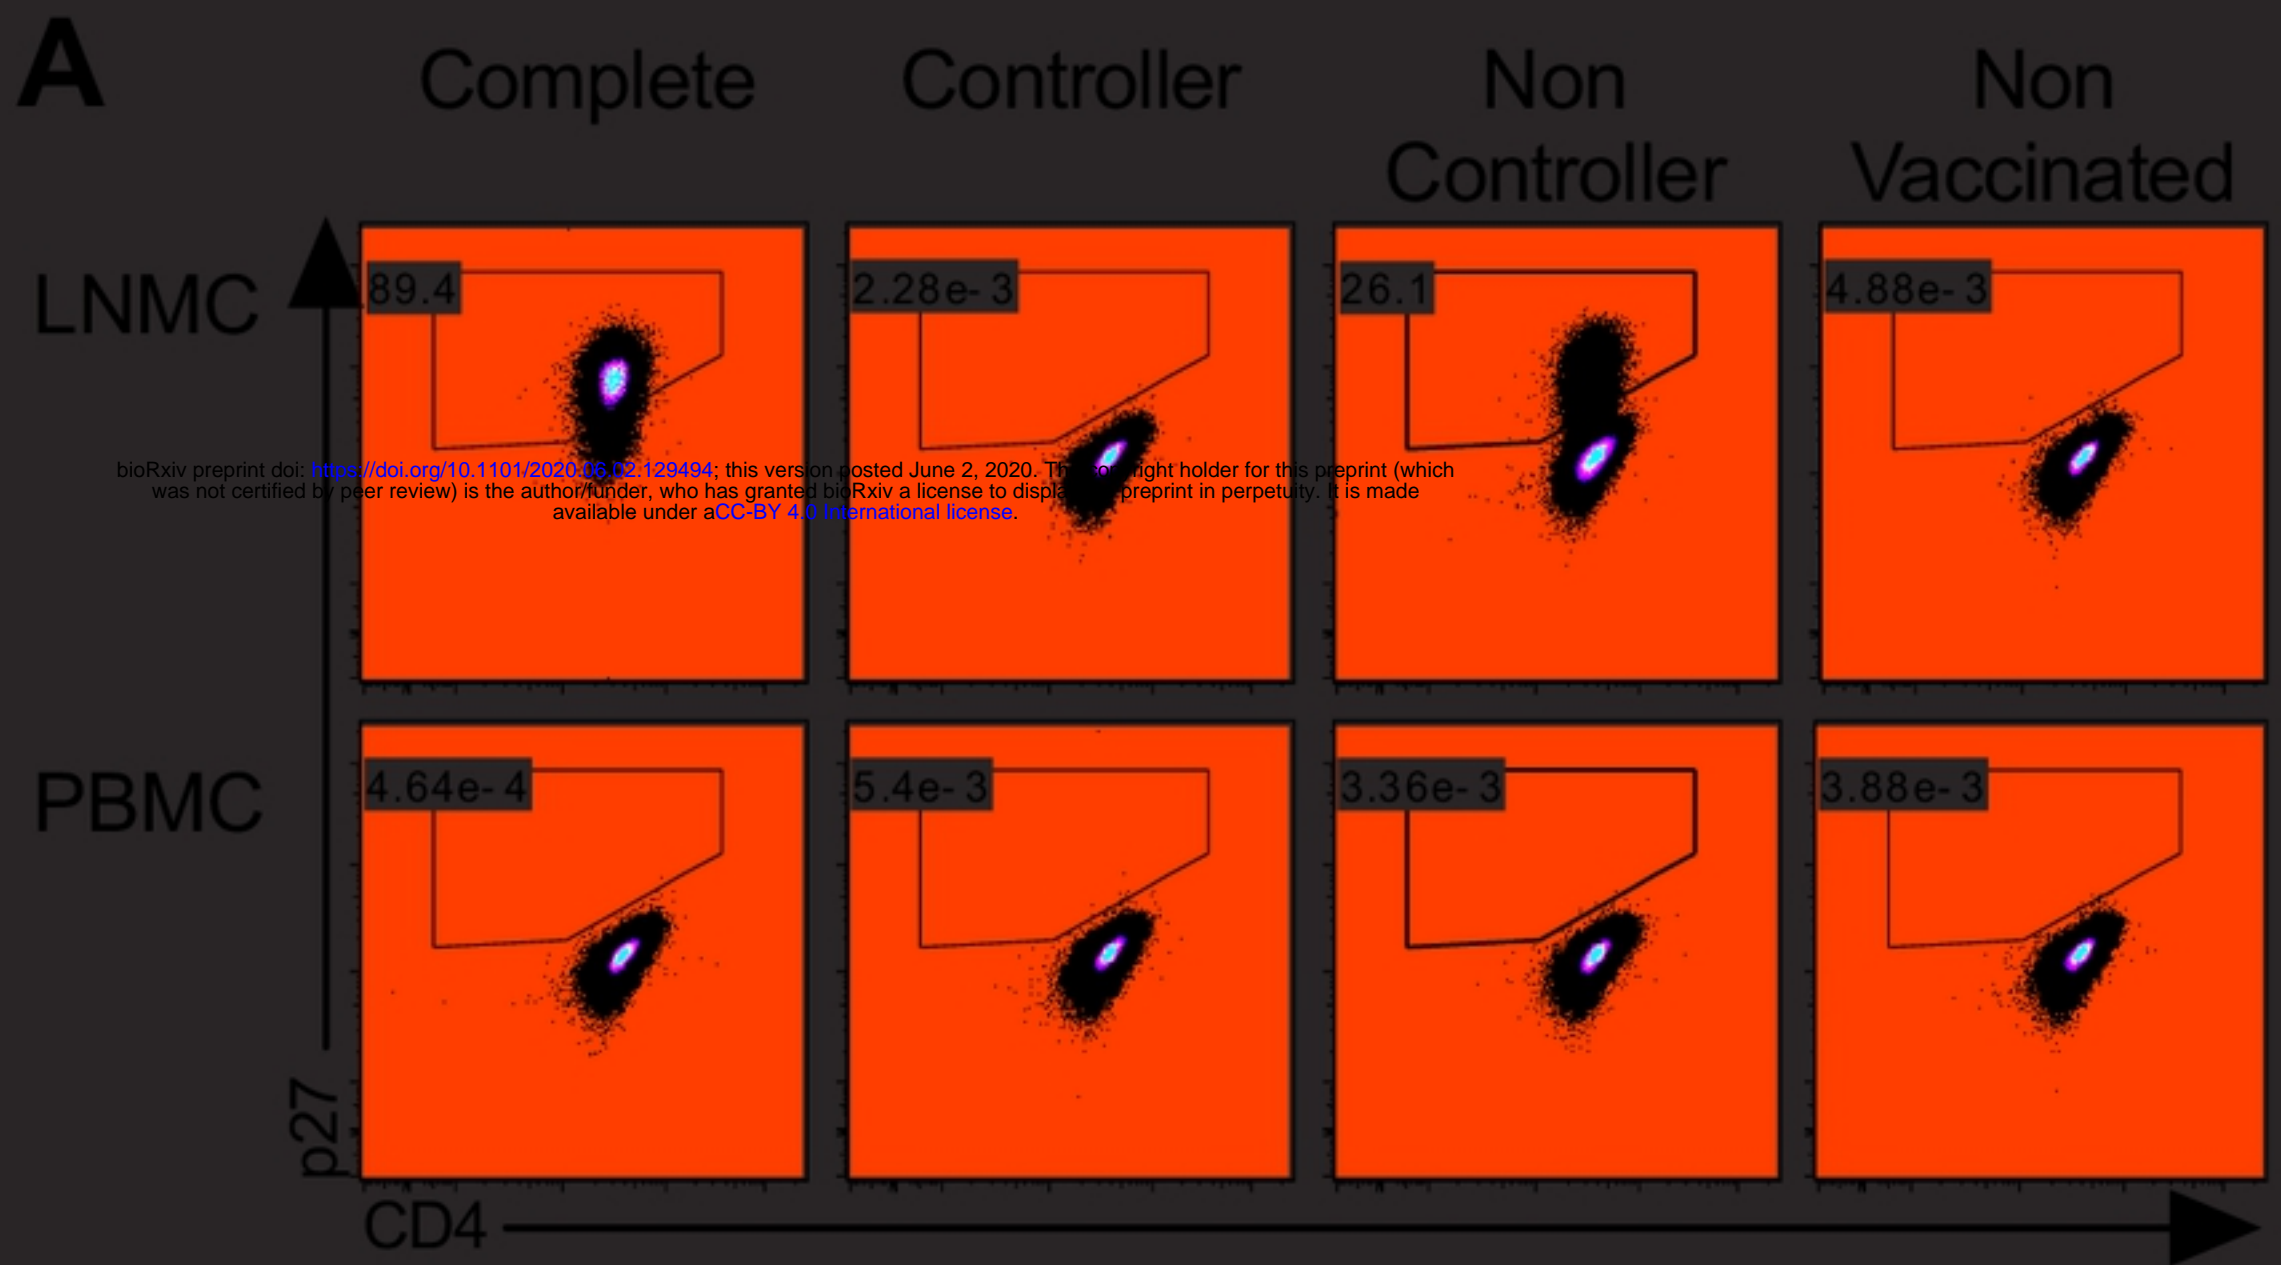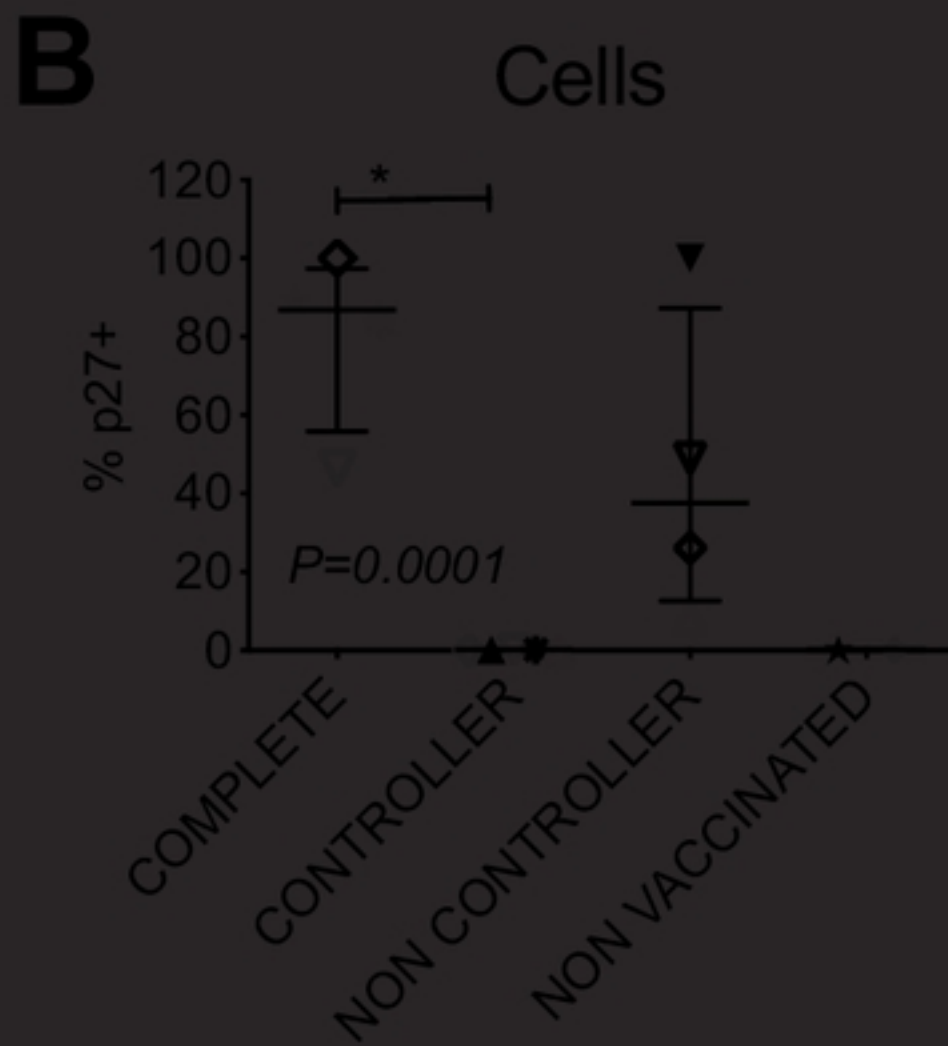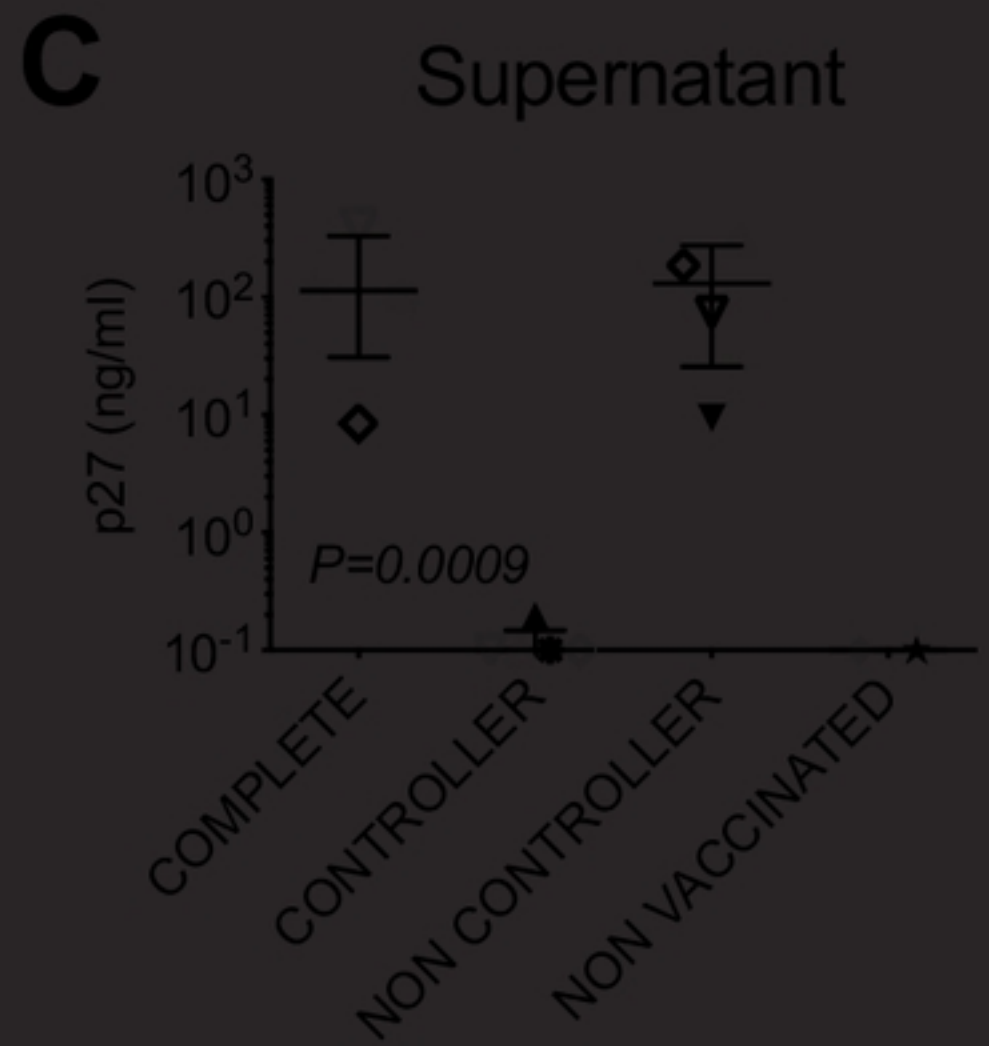

Figure 7



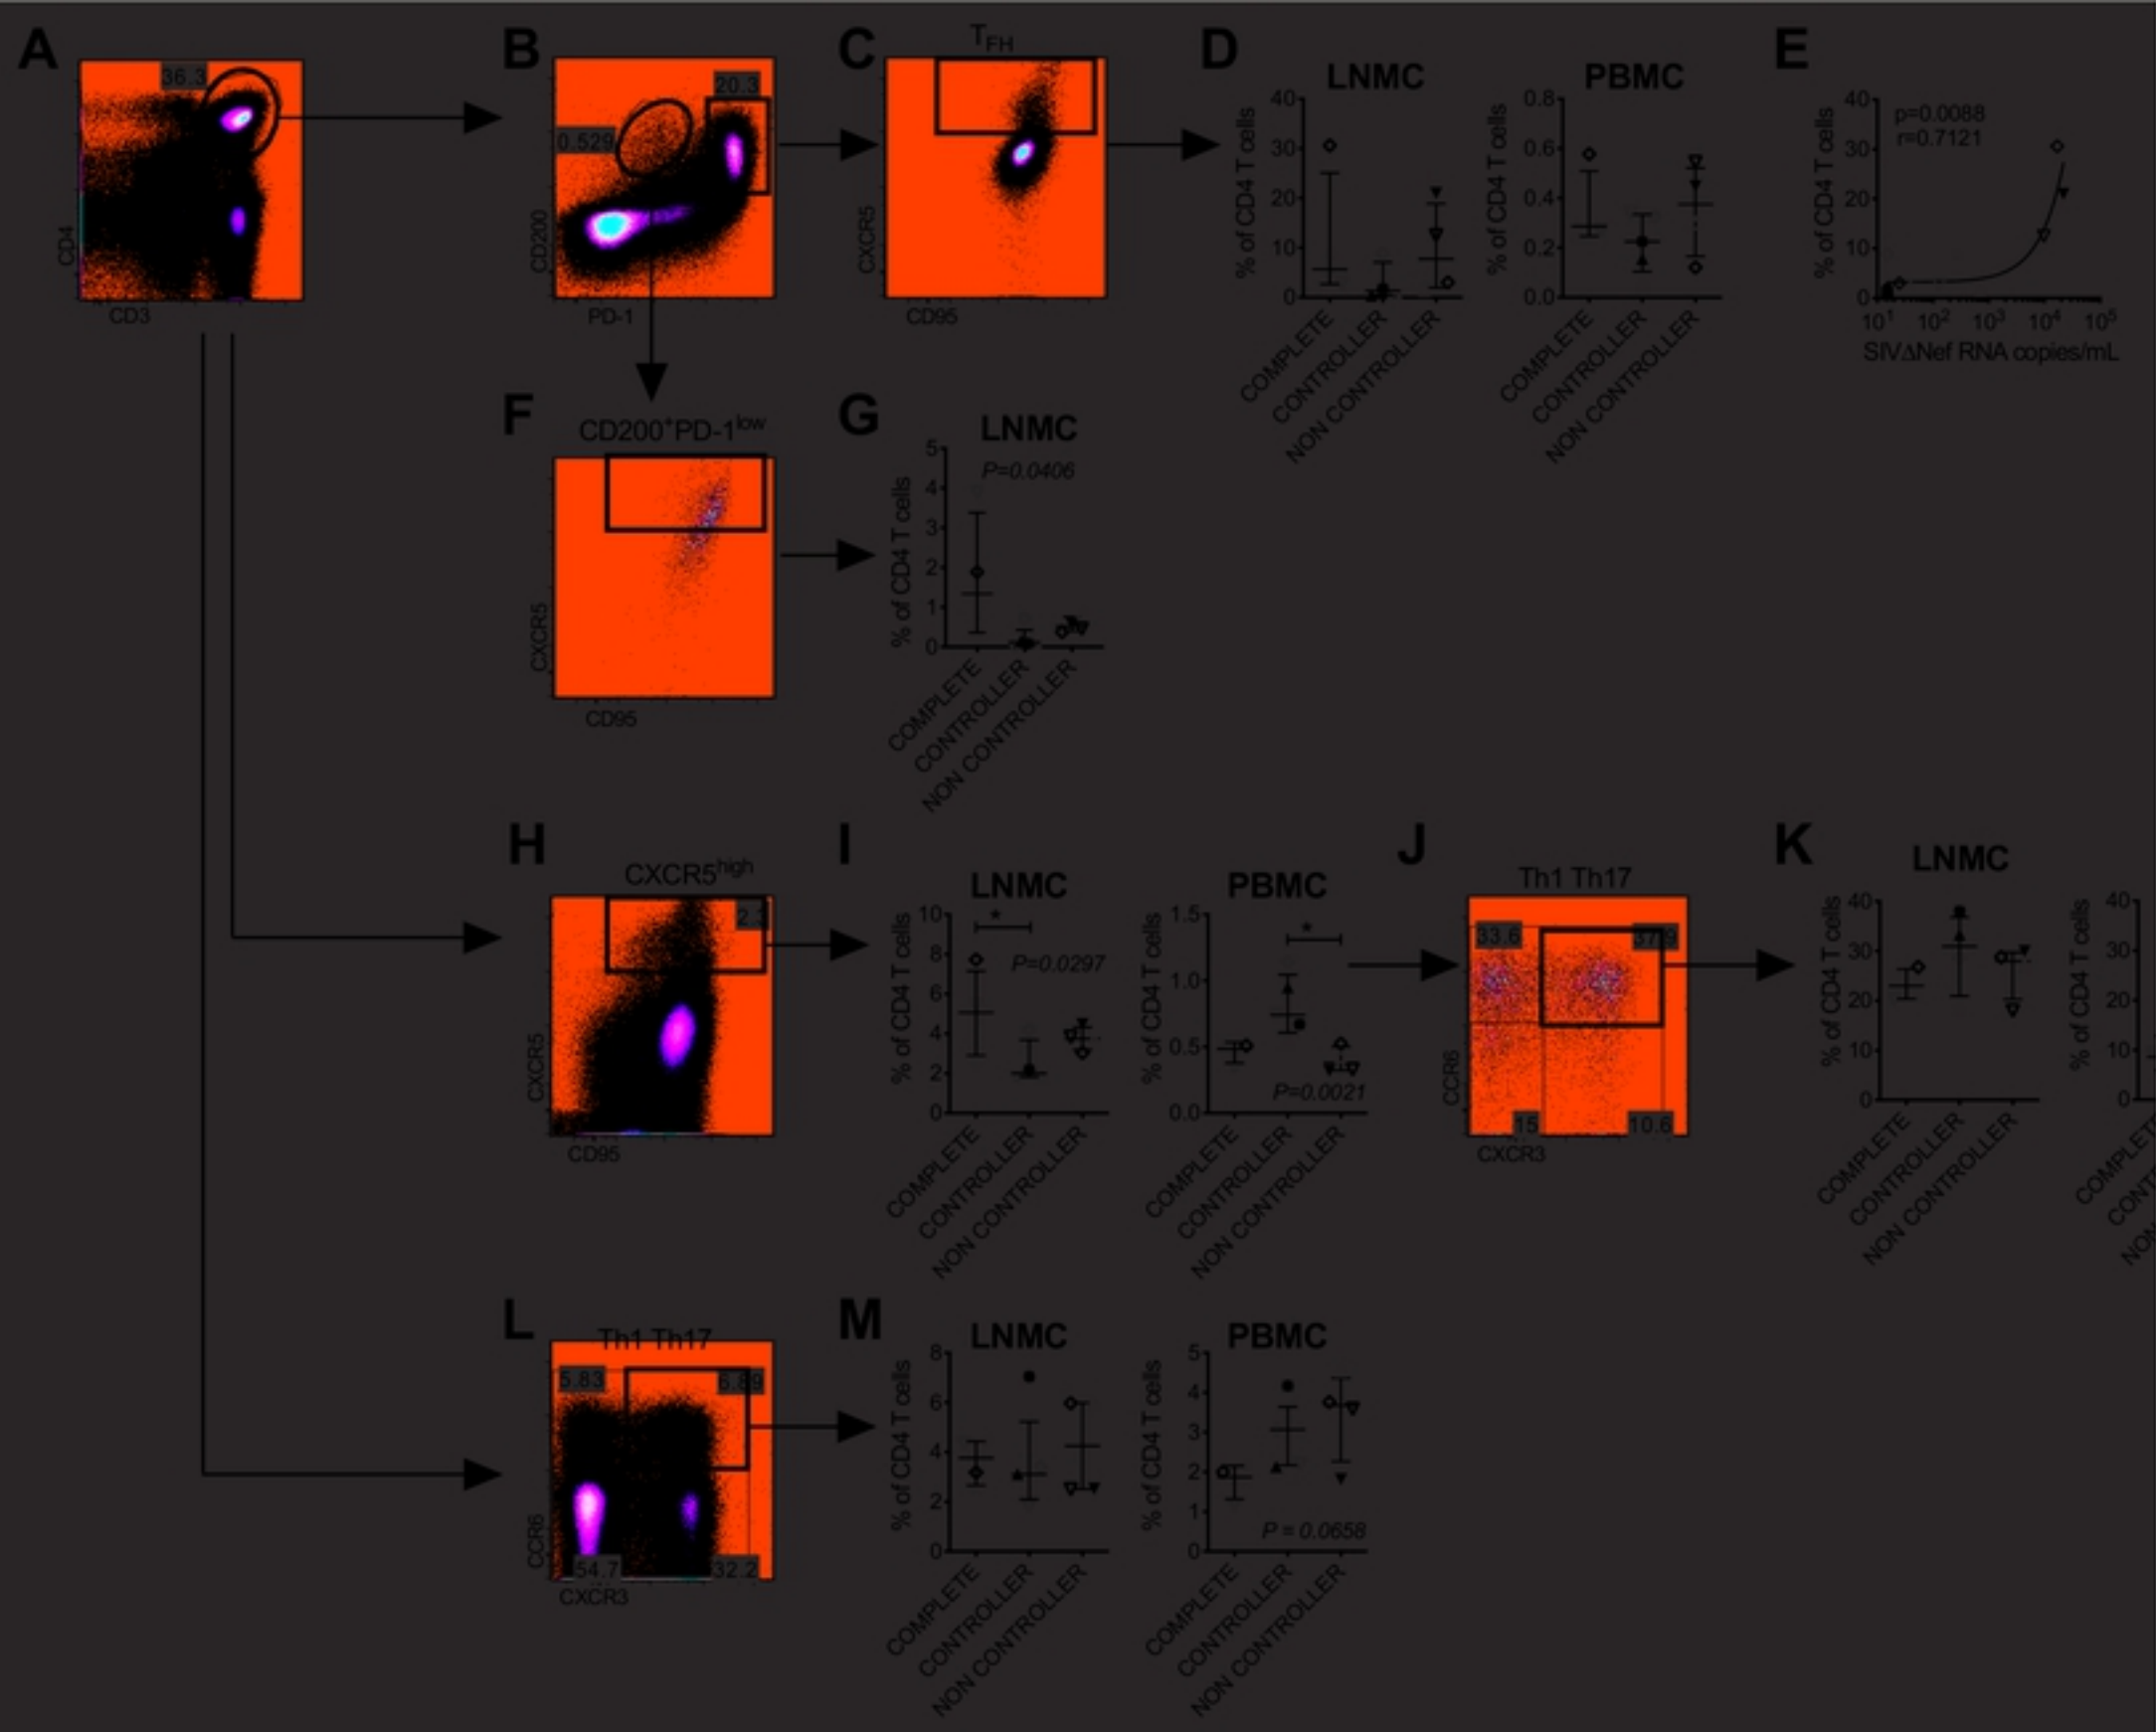

Figure 8

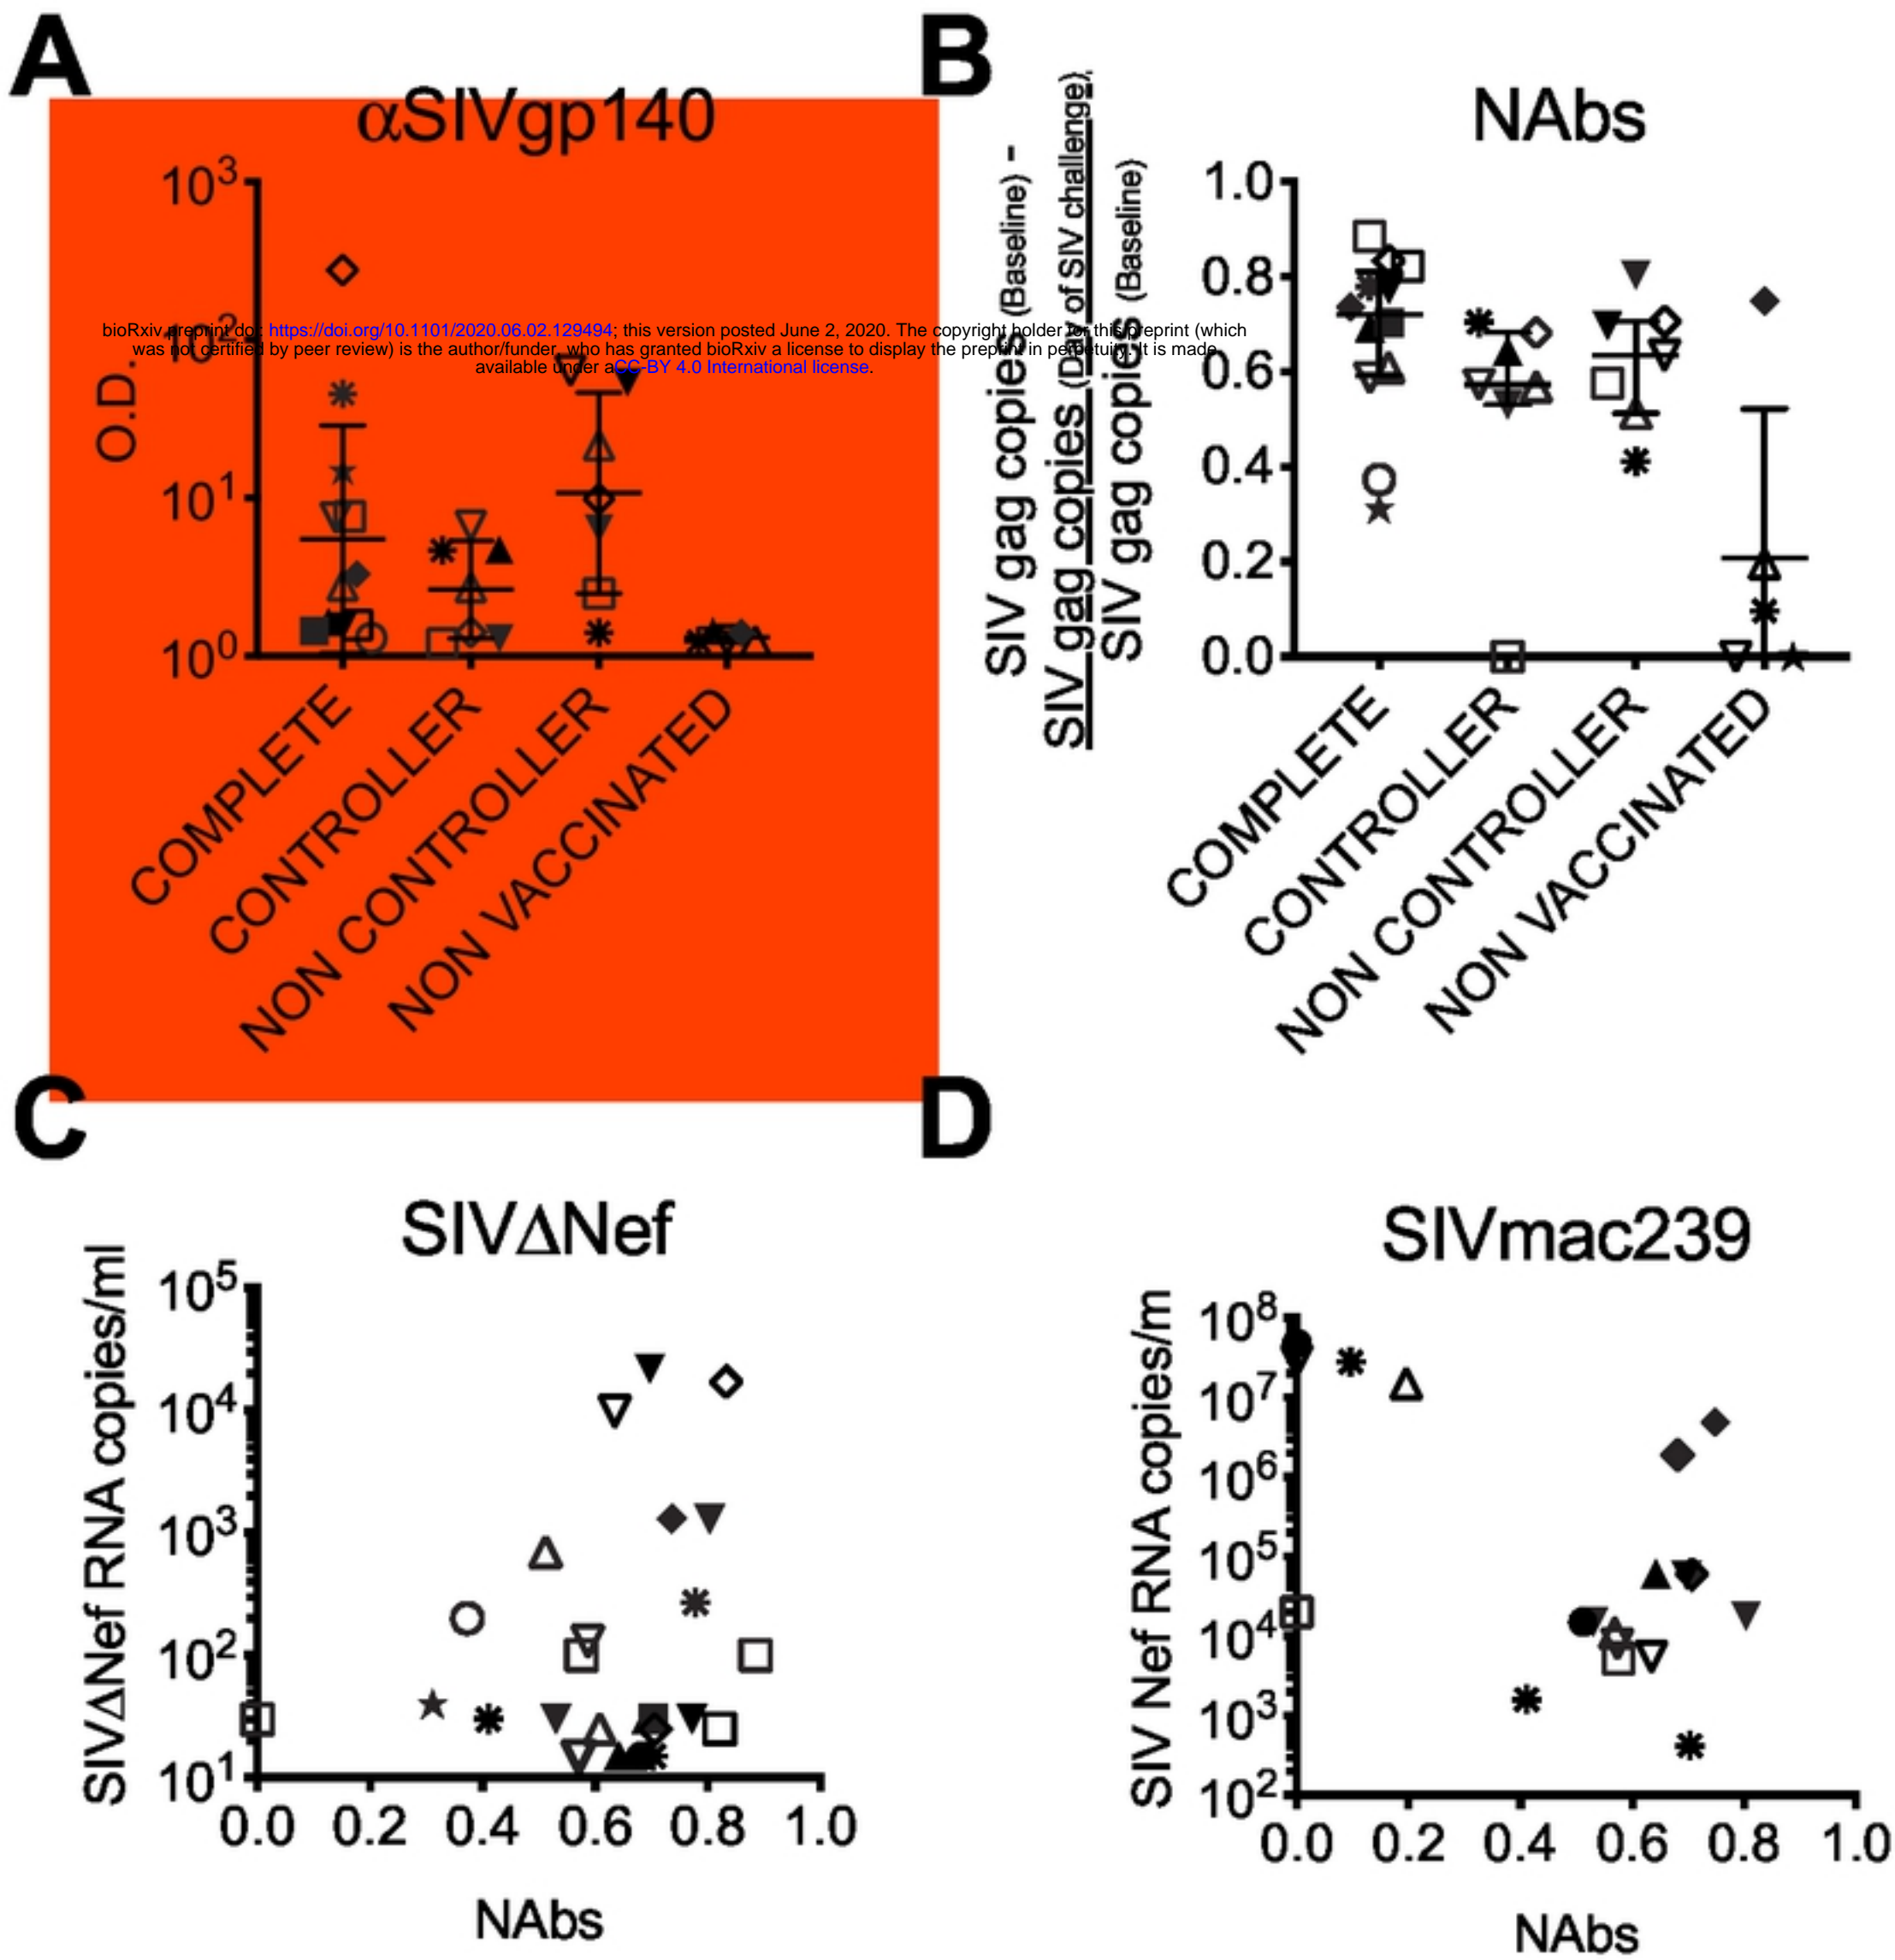

Figure 9

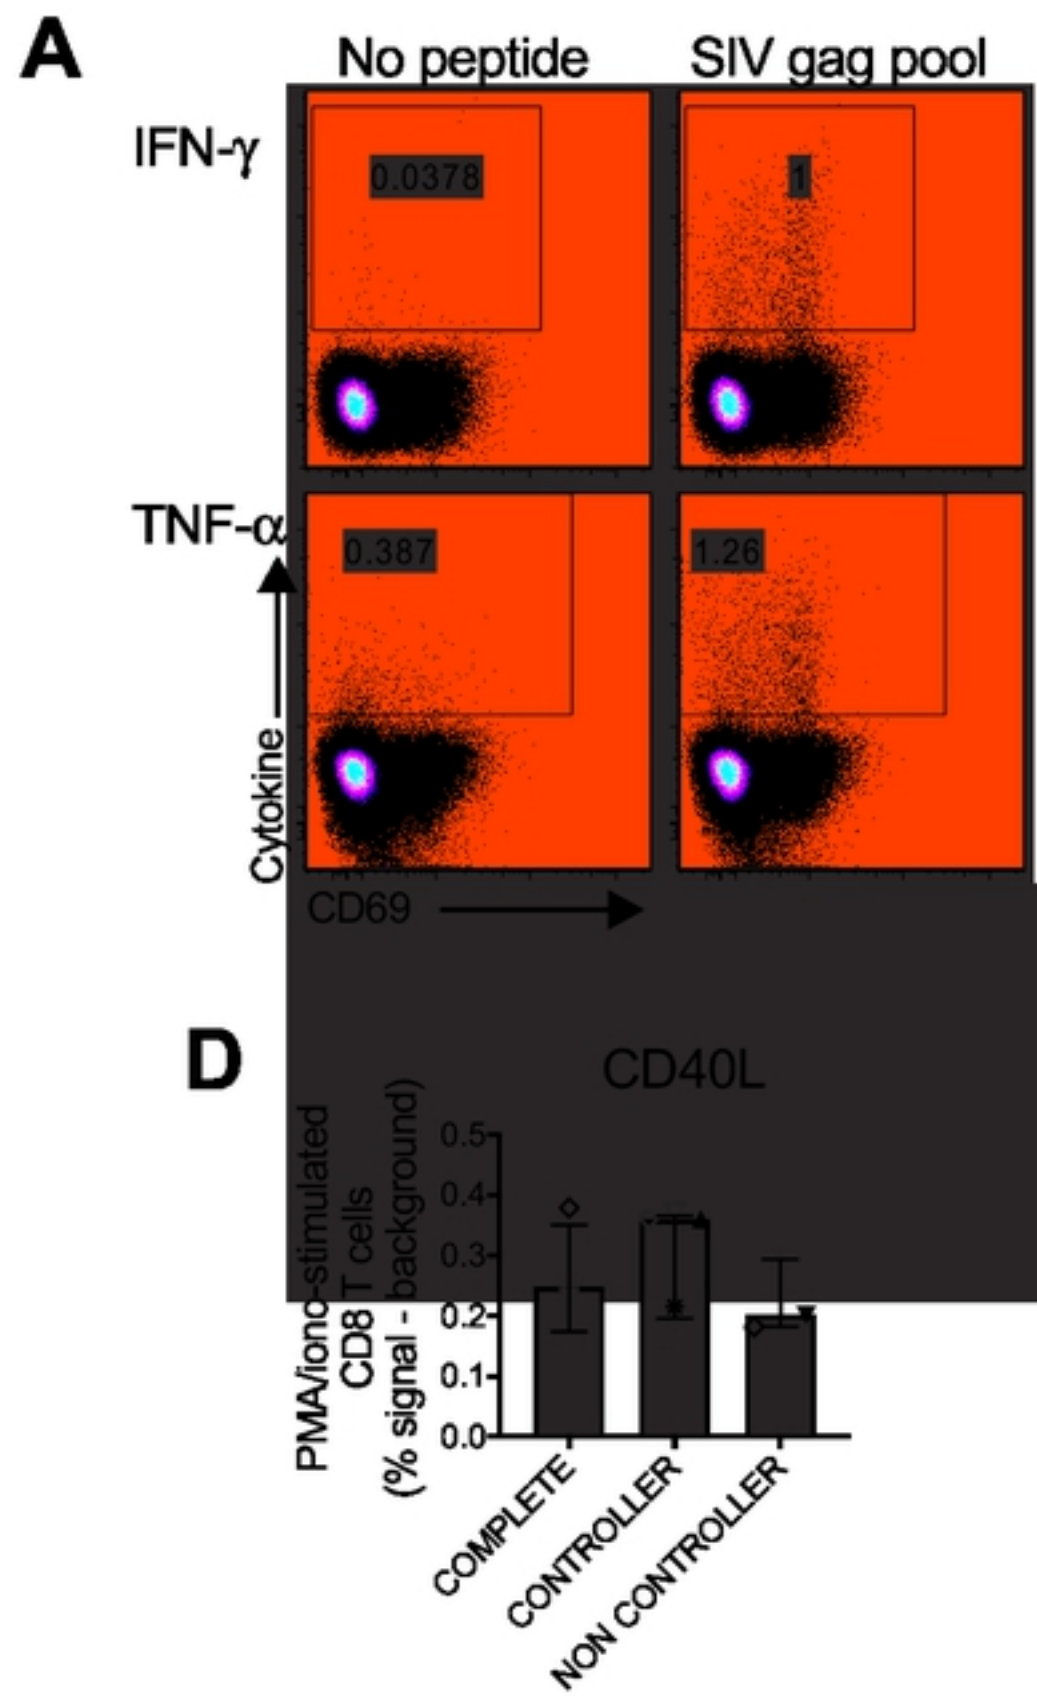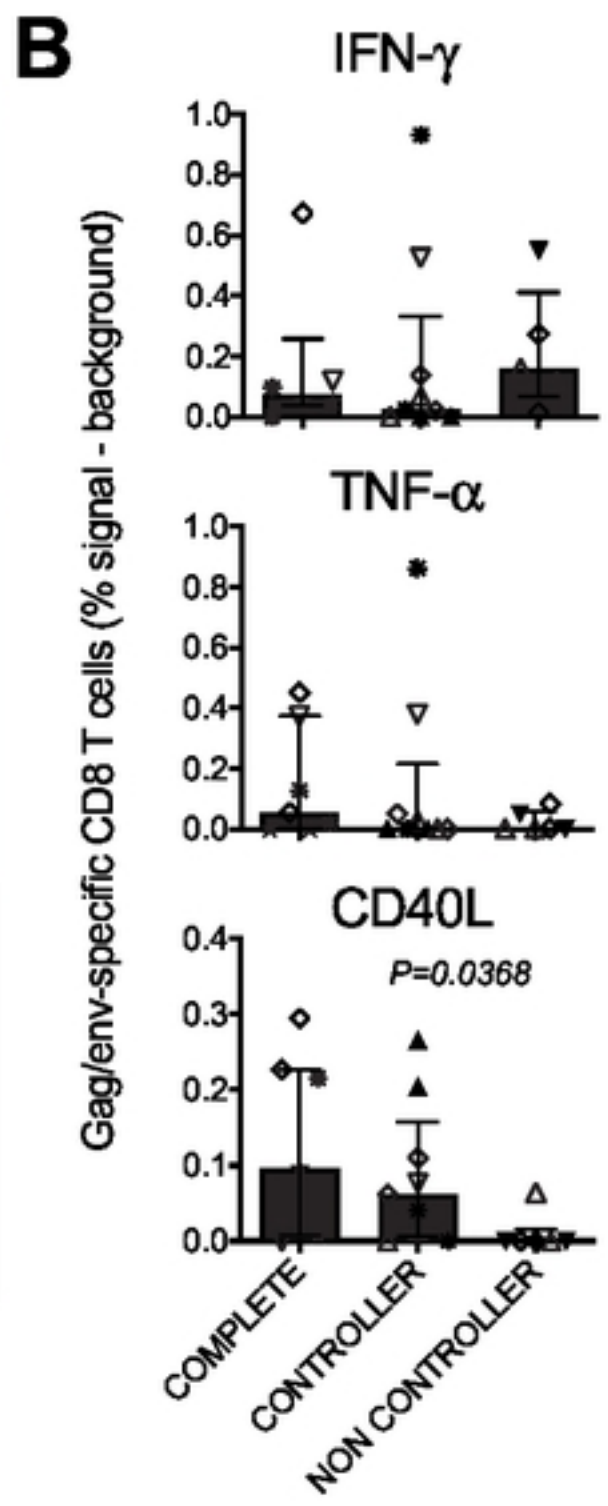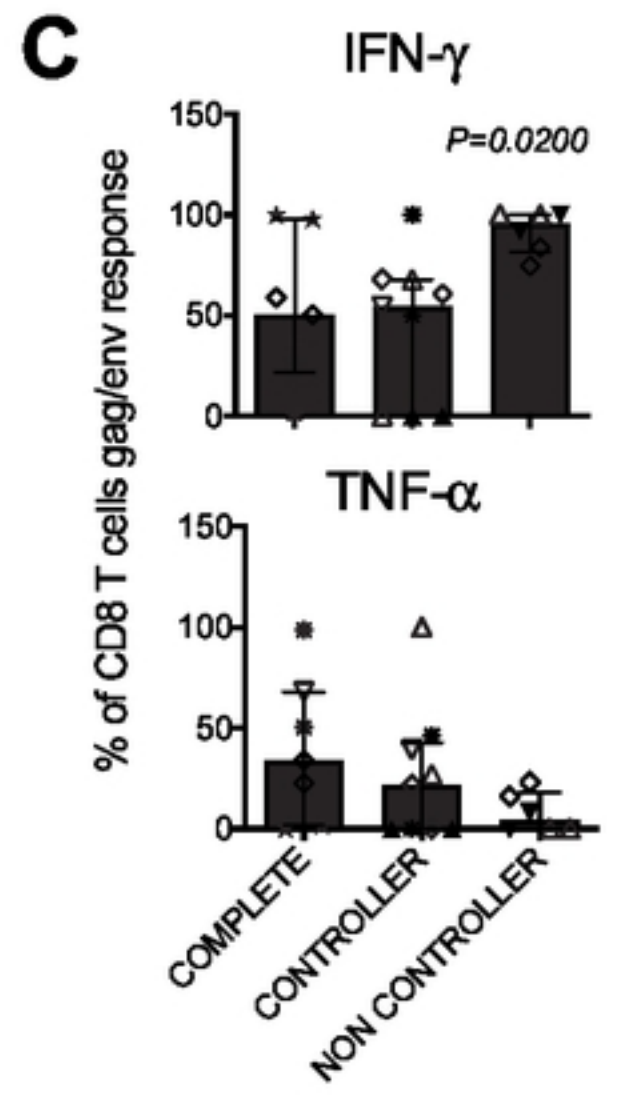

Figure 10
